# Supplementary material for: DFT computational insight into Pd(0)-catalyzed oxidative cross-coupling of 1,2-allenyl ketones and aryl boronic acids: Pd(ii)-carbenoid intermediate versus π-allyl-Pd(ii) intermediate
Source: Royal Society of Chemistry journal article supplement (doi:10.1039/d2cy01506d), 2022-11-10
Supplement: d2cy01506d1.pdf [file d2cy01506d1.pdf]

*Supplementary Information*

DFT Computational Insight into Pd(0)-Catalyzed Oxidative Cross-Couplings of 1,2-  
Allenyl Ketones and Aryl Boronic Acid: Pd(II)-Carbenoid Intermediate versus  $\pi$ -  
Allyl-Pd(II) Intermediate

Jihong Xu, Yanhong Liu, Chengbu Liu, and Dongju Zhang\*

Key Lab of Colloid and Interface Chemistry, Ministry of Education, Institute of  
Theoretical Chemistry, School of Chemistry and Chemical Engineering, Shandong  
University, Jinan 250100, P. R. China

Author E-mail Address:

zhangdj@sdu.edu.cn

## Table of Contents

|                                                                                      |    |
|--------------------------------------------------------------------------------------|----|
| 1. <i>i</i> Pr <sub>2</sub> NEt assisted oxidative transmetalation.....              | S3 |
| 2. Other transmetalation processes.....                                              | S4 |
| 3. Pd(0)-catalyzed nucleophilic cyclization.....                                     | S5 |
| 4. Possible migratory insertions of the phenyl group into the 1,2-allenyl ketone     | S5 |
| 5. 1,2-H shift process from Pd(II)-carbenoid intermediate <b>D<sub>a</sub></b> ..... | S6 |
| 6. Thermodynamic data.....                                                           | S6 |
| 7. Cartesian coordinates of all structures involved in this work.....                | S8 |

## 1. *iPr*<sub>2</sub>NEt assisted oxidative transmetalation

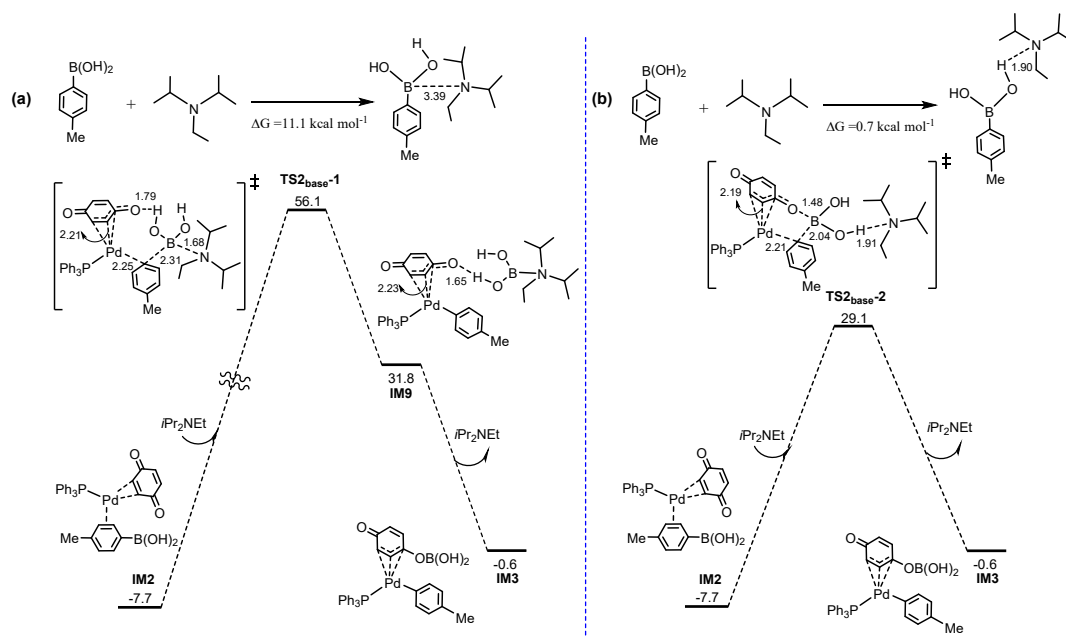

**Fig. S1** Calculated energy profile of *iPr*<sub>2</sub>NEt-assisted oxidative transmetalation processes. Selected bond distances are in Å.

Fig. S1a describes the pathway where *iPr*<sub>2</sub>NEt assists the oxidative transmetalation by forming a hypothetical acid-base adduct with aryl boronic acid. The calculated results indicate that the expected adduct cannot be formed due to the steric effect of two *iPr* groups and in this way the transmetalation barrier is found to be as high as 71.9 kcal mol<sup>-1</sup>. Fig. S1b shows the pathway where *iPr*<sub>2</sub>NEt assists the reaction by forming an H-bond complex with aryl boronic acid. The calculated barrier of the transmetalation process is 2.0 kcal mol<sup>-1</sup> higher than that (42.9 kcal/mol) without the *iPr*<sub>2</sub>NEt (TS2 relative to A' in Fig. 1).

## 2. Other possible transmetalation processes

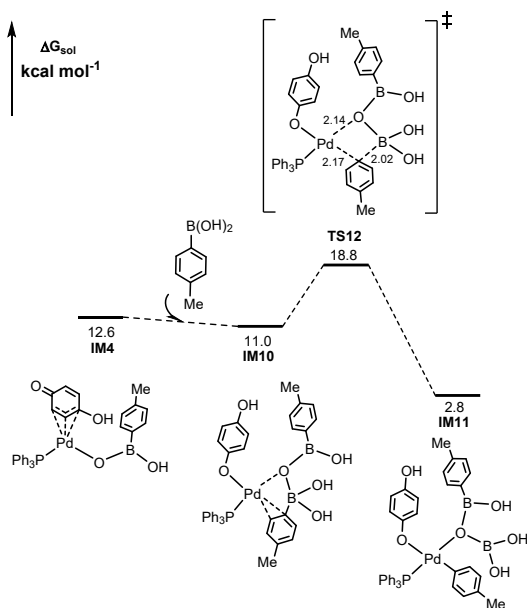

**Fig. S2** Calculated energy profile of transmetalation process followed by isomerization.

Selected bond distances are in Å.

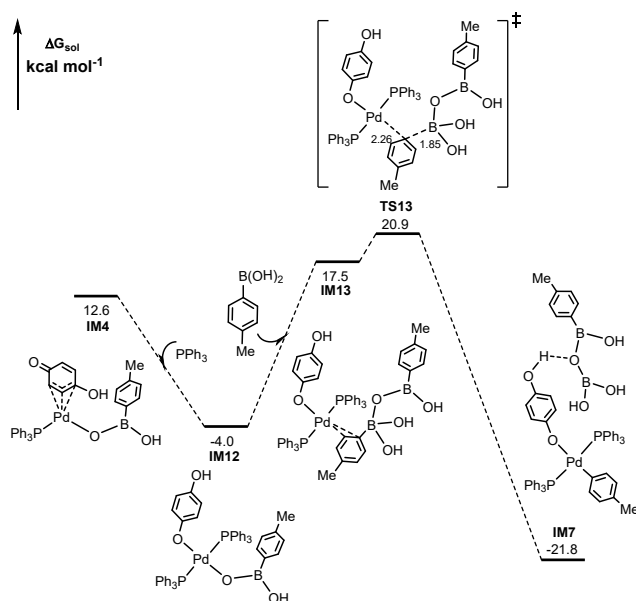

**Fig. S3** Calculated energy profile of transmetalation process followed by isomerization

with the addition of a  $\text{PPh}_3$ . Selected bond distances are in Å.

### 3. Pd(0)-catalyzed nucleophilic cyclization

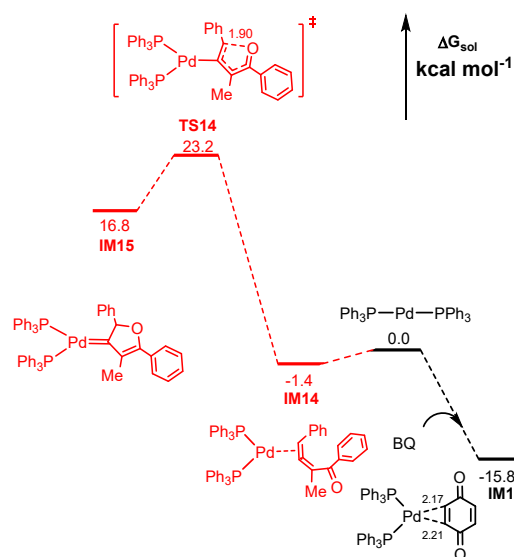

**Fig. S4** Calculated energy profiles of Pd(0)-catalyzed nucleophilic cyclization (red line) and the coordination of Pd(0) by BQ (black line). Selected bond distances are in Å.

### 4. Possible migratory insertions of the phenyl group to the 1,2-allenyl ketone

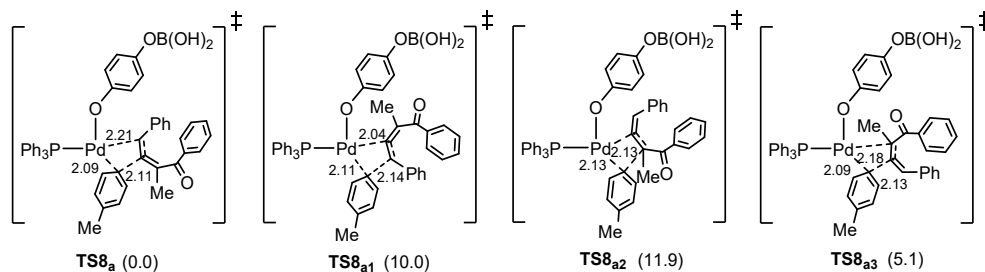

**Fig. S5** Calculated relative energies of several migratory-insertion transition states of the phenyl group to the allenyl ketone **1<sub>a</sub>**. The numbers in parenthesis are  $\Delta\Delta G^\ddagger$  (in kcal mol<sup>-1</sup>). Selected bond distances are in Å.



|                              |          |          |          |              |              |              |          |
|------------------------------|----------|----------|----------|--------------|--------------|--------------|----------|
| <b>IM1</b>                   | 0.792392 | 0.84524  | 0.707391 | -3028.619643 | -3027.774403 | -3027.912252 |          |
| <b>IM2</b>                   | 0.517051 | 0.553588 | 0.447917 | -1992.685919 | -1992.132331 | -1992.238002 |          |
| <b>TS2</b>                   | 0.515092 | 0.550755 | 0.449699 | -1992.632239 | -1992.081484 | -1992.18254  | -371.71  |
| <b>IM3</b>                   | 0.51707  | 0.553353 | 0.449096 | -1992.675749 | -1992.122396 | -1992.226653 |          |
| <b>TS3</b>                   | 0.511452 | 0.547247 | 0.443588 | -1992.648525 | -1992.101278 | -1992.204937 | -544.45  |
| <b>IM4</b>                   | 0.515046 | 0.55141  | 0.446481 | -1992.652107 | -1992.100697 | -1992.205626 |          |
| <b>IM5</b>                   | 0.67161  | 0.717673 | 0.594921 | -2440.098466 | -2439.380793 | -2439.503545 |          |
| <b>TS4</b>                   | 0.670956 | 0.717188 | 0.59321  | -2440.088152 | -2439.370964 | -2439.494942 | -271.34  |
| <b>IM6</b>                   | 0.673439 | 0.719827 | 0.593837 | -2440.121282 | -2439.401455 | -2439.527445 |          |
| <b>IM7</b>                   | 0.947733 | 1.011748 | 0.846497 | -3476.088788 | -3475.07704  | -3475.242291 |          |
| <b>TS5</b>                   | 0.941263 | 1.005076 | 0.838009 | -3476.029668 | -3475.024592 | -3475.191659 | -1193.37 |
| <b>B</b>                     | 0.791754 | 0.844632 | 0.702903 | -3028.642274 | -3027.797642 | -3027.939371 |          |
| <b>C<sub>a</sub></b>         | 0.773166 | 0.827158 | 0.681273 | -2723.761103 | -2722.933945 | -2723.07983  |          |
| <b>TS6<sub>a</sub></b>       | 0.774259 | 0.827143 | 0.682959 | -2723.744228 | -2722.917085 | -2723.061269 | -100.70  |
| <b>D<sub>a</sub></b>         | 0.776494 | 0.829193 | 0.684507 | -2723.764737 | -2722.935544 | -2723.08023  |          |
| <b>TS7<sub>a</sub></b>       | 0.775896 | 0.827922 | 0.686321 | -2723.747016 | -2722.919094 | -2723.060695 | -300.06  |
| <b>E<sub>a</sub></b>         | 0.777388 | 0.830131 | 0.683091 | -2723.809943 | -2722.979812 | -2723.126852 |          |
| <b>TS8<sub>a</sub></b>       | 0.774438 | 0.827071 | 0.684532 | -2723.747261 | -2722.92019  | -2723.062729 | -262.41  |
| <b>TS8<sub>r-1</sub></b>     | 0.774704 | 0.82722  | 0.686097 | -2723.732952 | -2722.905732 | -2723.046855 | -282.20  |
| <b>TS8<sub>r-2</sub></b>     | 0.773792 | 0.826683 | 0.682693 | -2723.726526 | -2722.899843 | -2723.043833 | -258.34  |
| <b>TS8<sub>r-3</sub></b>     | 0.774412 | 0.827002 | 0.685996 | -2723.740533 | -2722.913531 | -2723.054537 | -251.76  |
| <b>G<sub>a</sub></b>         | 0.77747  | 0.830154 | 0.688611 | -2723.818815 | -2722.988661 | -2723.130204 |          |
| <b>TS9<sub>a</sub></b>       | 0.775619 | 0.828033 | 0.686578 | -2723.772169 | -2722.944136 | -2723.085591 | -263.00  |
| <b>TS10<sub>a</sub></b>      | 0.773268 | 0.825398 | 0.683812 | -2723.784322 | -2722.958924 | -2723.10051  | -412.98  |
| <b>IM8</b>                   | 0.6814   | 0.727626 | 0.59946  | -2758.419013 | -2757.691387 | -2757.819553 |          |
| <b>F</b>                     | 0.681079 | 0.72836  | 0.596104 | -2758.410102 | -2757.681742 | -2757.813998 |          |
| <b>TS11</b>                  | 0.678298 | 0.724598 | 0.59666  | -2758.382545 | -2757.657947 | -2757.785885 | -998.62  |
| <b>TS2<sub>basic-1</sub></b> | 0.783589 | 0.830491 | 0.707882 | -2363.46111  | -2362.630619 | -2362.753228 | -373.16  |
| <b>IM9</b>                   | 0.785073 | 0.832488 | 0.707662 | -2363.499528 | -2362.66704  | -2362.791866 |          |
| <b>TS2<sub>basic-2</sub></b> | 0.77961  | 0.828278 | 0.698456 | -2363.494656 | -2362.666378 | -2362.7962   | -357.14  |
| <b>IM10</b>                  | 0.670616 | 0.716549 | 0.592531 | -2440.096083 | -2439.379534 | -2439.503552 |          |
| <b>TS12</b>                  | 0.668913 | 0.715702 | 0.588411 | -2440.079576 | -2439.363874 | -2439.491165 | -198.42  |
| <b>IM11</b>                  | 0.671805 | 0.71864  | 0.591978 | -2440.108562 | -2439.389922 | -2439.516584 |          |
| <b>IM12</b>                  | 0.790768 | 0.845013 | 0.697845 | -3028.616394 | -3027.771381 | -3027.918549 |          |
| <b>IM13</b>                  | 0.946912 | 1.010085 | 0.851163 | -3476.03075  | -3475.020665 | -3475.179587 |          |
| <b>TS13</b>                  | 0.945214 | 1.008752 | 0.847891 | -3476.02219  | -3475.013438 | -3475.174299 | -156.48  |
| <b>IM14</b>                  | 0.808699 | 0.860996 | 0.721013 | -2930.925966 | -2930.06497  | -2930.204953 |          |
| <b>TS14</b>                  | 0.807387 | 0.859254 | 0.718451 | -2930.884169 | -2930.024915 | -2930.165718 | -430.30  |
| <b>IM15</b>                  | 0.809883 | 0.861539 | 0.721156 | -2930.897146 | -2930.035607 | -2930.17599  |          |
| <b>TS15</b>                  | 0.77239  | 0.824706 | 0.683864 | -2723.731453 | -2722.906747 | -2723.047589 | -807.65  |
| <b>3<sub>a</sub></b>         | 0.367949 | 0.390002 | 0.316018 | -1001.33305  | -1000.943048 | -1001.017032 |          |
| <b>3<sub>a</sub>'</b>        | 0.259584 | 0.275113 | 0.216498 | -731.1054366 | -730.8303236 | -730.8889386 |          |
| <b>1<sub>b</sub></b>         | 0.147172 | 0.157681 | 0.111644 | -460.8312447 | -460.6735637 | -460.7196007 |          |
| <b>C<sub>b</sub></b>         | 0.663839 | 0.711835 | 0.576778 | -2453.527033 | -2452.8152   | -2452.95026  |          |

|                         |          |           |          |              |              |              |         |
|-------------------------|----------|-----------|----------|--------------|--------------|--------------|---------|
| <b>TS6<sub>b</sub></b>  | 0.663019 | 0.710257  | 0.577073 | -2453.508192 | -2452.797935 | -2452.931119 | -283.41 |
| <b>D<sub>b</sub></b>    | 0.667958 | 0.714354  | 0.584937 | -2453.537567 | -2452.823213 | -2452.95263  |         |
| <b>TS7<sub>b</sub></b>  | 0.666607 | 0.712715  | 0.582739 | -2453.522015 | -2452.8093   | -2452.939276 | -290.66 |
| <b>E<sub>b</sub></b>    | 0.669708 | 0.71479   | 0.589664 | -2453.587654 | -2452.872864 | -2452.99799  |         |
| <b>TS8<sub>b</sub></b>  | 0.66442  | 0.711217  | 0.580466 | -2453.510861 | -2452.799644 | -2452.930395 | -345.76 |
| <b>G<sub>b</sub></b>    | 0.667675 | 0.714506  | 0.582264 | -2453.600518 | -2452.886012 | -2453.018254 |         |
| <b>TS9<sub>b</sub></b>  | 0.666779 | 0.712798  | 0.585075 | -2453.53761  | -2452.824812 | -2452.952535 | -463.85 |
| <b>TS10<sub>b</sub></b> | 0.664006 | 0.709885  | 0.582178 | -2453.558193 | -2452.848308 | -2452.976015 | -570.84 |
| <b>3<sub>b</sub></b>    | 0.258839 | 0.2737520 | 0.216663 | -731.1002944 | -730.8265424 | -730.8836314 |         |

## 7. Cartesian coordinates of all structures involved in this work

### PPh<sub>3</sub>

|   |             |             |             |
|---|-------------|-------------|-------------|
| P | -0.00103600 | -0.00127200 | -1.27980700 |
| C | 0.36221100  | 1.60166800  | -0.44680800 |
| C | 1.38325100  | 2.38096500  | -1.00236600 |
| C | -0.29728200 | 2.06821100  | 0.69362600  |
| C | 1.74930700  | 3.59092600  | -0.42455700 |
| H | 1.89626200  | 2.02951500  | -1.89942600 |
| C | 0.06111800  | 3.28564100  | 1.26591300  |
| H | -1.09552600 | 1.47360600  | 1.13908700  |
| C | 1.08510700  | 4.04702000  | 0.71094700  |
| H | 2.54892500  | 4.18405300  | -0.86605000 |
| H | -0.46128200 | 3.63929200  | 2.15390200  |
| H | 1.36400300  | 4.99842600  | 1.16146800  |
| C | -1.57120900 | -0.48655100 | -0.44694200 |
| C | -2.75430800 | 0.02739200  | -0.99000100 |
| C | -1.64871400 | -1.30908800 | 0.68007800  |
| C | -3.98556600 | -0.25863700 | -0.41223300 |
| H | -2.70449000 | 0.66171200  | -1.87691300 |
| C | -2.88287900 | -1.60551500 | 1.25217700  |
| H | -0.73668400 | -1.71827700 | 1.11562300  |
| C | -4.05163800 | -1.07982600 | 0.71029500  |
| H | -4.89697200 | 0.15289000  | -0.84359500 |
| H | -2.93012100 | -2.24886100 | 2.12985600  |
| H | -5.01537400 | -1.31232600 | 1.16097700  |
| C | 1.20505200  | -1.11817900 | -0.44724900 |
| C | 1.97196900  | -0.76587500 | 0.66636200  |
| C | 1.34068900  | -2.40548500 | -0.97996200 |
| C | 2.85255100  | -1.68276500 | 1.23421000  |
| H | 1.87889600  | 0.23254000  | 1.09431100  |
| C | 2.20988900  | -3.32526100 | -0.40549500 |
| H | 0.75334700  | -2.68652300 | -1.85610500 |
| C | 2.97155200  | -2.96286400 | 0.70248400  |
| H | 3.44651300  | -1.39500500 | 2.10073600  |



|                      |             |             |             |
|----------------------|-------------|-------------|-------------|
| H                    | 2.30094400  | -4.32450900 | -0.82889300 |
| H                    | 3.66050600  | -3.67811600 | 1.14926200  |
| <b>BQ</b>            |             |             |             |
| C                    | -0.66937700 | 1.26411600  | 0.00028400  |
| C                    | 0.66931600  | 1.26402000  | 0.00014900  |
| C                    | 1.44135700  | -0.00003800 | 0.00001100  |
| C                    | 0.66939200  | -1.26413100 | 0.00029200  |
| C                    | -0.66933600 | -1.26402300 | 0.00006600  |
| C                    | -1.44136100 | 0.00005000  | -0.00001900 |
| H                    | 1.26189300  | 2.17767000  | -0.00004300 |
| O                    | -2.66020900 | -0.00006000 | -0.00033100 |
| H                    | -1.26172900 | 2.17790300  | 0.00035300  |
| O                    | 2.66020800  | 0.00005400  | -0.00036700 |
| H                    | -1.26197800 | -2.17764100 | 0.00003600  |
| H                    | 1.26187100  | -2.17784100 | 0.00053400  |
| <b>2</b>             |             |             |             |
| B                    | -2.21540100 | 0.00002100  | 0.00302600  |
| O                    | -2.86285000 | -1.20818200 | 0.00461400  |
| H                    | -3.82447700 | -1.15394800 | 0.00762200  |
| O                    | -2.86280100 | 1.20824100  | 0.00528500  |
| H                    | -3.82443000 | 1.15404400  | 0.00814600  |
| C                    | -0.66055500 | -0.00000600 | -0.00072000 |
| C                    | 0.06458400  | -1.19817500 | -0.00445500 |
| C                    | 0.06466300  | 1.19814300  | -0.00487600 |
| C                    | 1.45297100  | -1.19933500 | -0.01085300 |
| H                    | -0.47660400 | -2.14446000 | -0.00640800 |
| C                    | 1.45301800  | 1.19926700  | -0.01112500 |
| H                    | -0.47651400 | 2.14443800  | -0.00719900 |
| C                    | 2.16923400  | -0.00006800 | -0.01027500 |
| H                    | 1.99868600  | -2.14433600 | -0.01790700 |
| H                    | 1.99876000  | 2.14426400  | -0.01809400 |
| C                    | 3.66854400  | 0.00002000  | 0.01670000  |
| H                    | 4.04801300  | 0.00610300  | 1.04874700  |
| H                    | 4.08194600  | -0.89092000 | -0.47264000 |
| H                    | 4.08208600  | 0.88516100  | -0.48297300 |
| <b>1<sub>a</sub></b> |             |             |             |
| C                    | -0.69341100 | 1.90532300  | -0.49493300 |
| C                    | 0.26774100  | 1.10521900  | -0.90085600 |
| C                    | 1.24913600  | 0.32270400  | -1.28172100 |
| H                    | 1.21381200  | -0.08589600 | -2.29700500 |
| C                    | -1.87598000 | 1.39212900  | 0.26979500  |

|   |             |             |             |
|---|-------------|-------------|-------------|
| O | -2.46126700 | 2.15401000  | 1.02254500  |
| C | 2.40459700  | -0.07735100 | -0.47046000 |
| C | 3.33884100  | -0.96771100 | -1.00791000 |
| C | 2.60311100  | 0.40519400  | 0.82912700  |
| C | 4.44404800  | -1.37037200 | -0.26726100 |
| H | 3.19053000  | -1.34745700 | -2.01940500 |
| C | 3.70640700  | 0.00349800  | 1.56712400  |
| H | 1.88014400  | 1.10173400  | 1.25393000  |
| C | 4.63141600  | -0.88624300 | 1.02284700  |
| H | 5.16141600  | -2.06583600 | -0.70007200 |
| H | 3.84819500  | 0.38808500  | 2.57593700  |
| H | 5.49686700  | -1.19847300 | 1.60480300  |
| C | -2.31735300 | -0.02271800 | 0.12810200  |
| C | -2.11719500 | -0.77532400 | -1.03258500 |
| C | -3.02899500 | -0.58431900 | 1.19316500  |
| C | -2.60584500 | -2.07374600 | -1.11754200 |
| H | -1.60184300 | -0.33222300 | -1.88223500 |
| C | -3.49973000 | -1.88651200 | 1.11508500  |
| H | -3.20100600 | 0.02725800  | 2.07679500  |
| C | -3.28766500 | -2.63391200 | -0.04180000 |
| H | -2.45667800 | -2.64924000 | -2.02951700 |
| H | -4.03943700 | -2.32180900 | 1.95434300  |
| H | -3.66319400 | -3.65393500 | -0.10781200 |
| C | -0.60854400 | 3.40199800  | -0.62230600 |
| H | -0.60792800 | 3.86121000  | 0.37331300  |
| H | 0.29434100  | 3.70292000  | -1.16244500 |
| H | -1.48857000 | 3.79444700  | -1.14821900 |

***i*Pr<sub>2</sub>NEt**

|   |             |             |             |
|---|-------------|-------------|-------------|
| N | 0.01610600  | 0.26094400  | 0.11917000  |
| C | 0.45761800  | 1.37461500  | -0.69969700 |
| C | 0.20863700  | 2.71476500  | -0.02680700 |
| H | -0.01165400 | 1.35912800  | -1.70553100 |
| H | 1.53675300  | 1.27374400  | -0.87863700 |
| H | 0.54369000  | 3.54814600  | -0.65862400 |
| H | -0.85709100 | 2.87050600  | 0.18853700  |
| H | 0.74806900  | 2.75702400  | 0.92841300  |
| C | -1.41606500 | -0.01601200 | 0.04475100  |
| C | -1.94281000 | -0.54727000 | 1.37162000  |
| C | -1.83679600 | -0.91966700 | -1.11455300 |
| H | -1.89194900 | 0.96546700  | -0.11731800 |
| H | -1.64828900 | 0.11858500  | 2.19205300  |
| H | -3.03813300 | -0.62645800 | 1.35411200  |
| H | -1.55025400 | -1.55025200 | 1.59158200  |

|   |             |             |             |
|---|-------------|-------------|-------------|
| H | -1.47444400 | -0.53594000 | -2.07834900 |
| H | -1.44785200 | -1.93996400 | -0.98453900 |
| H | -2.93135300 | -0.99256000 | -1.17438000 |
| C | 0.92139700  | -0.88284000 | 0.22294600  |
| C | 2.01384000  | -0.58044700 | 1.24149500  |
| C | 1.53020400  | -1.37107200 | -1.09408000 |
| H | 0.31883500  | -1.71223400 | 0.62556900  |
| H | 1.56872300  | -0.33547800 | 2.21391800  |
| H | 2.69683900  | -1.43211800 | 1.36708600  |
| H | 2.61737700  | 0.28306000  | 0.92343100  |
| H | 0.76559400  | -1.54922900 | -1.86029600 |
| H | 2.25145900  | -0.64878700 | -1.50122000 |
| H | 2.07478100  | -2.31167900 | -0.93405800 |

**Pd(PPh<sub>3</sub>)<sub>2</sub>**

|    |             |             |             |
|----|-------------|-------------|-------------|
| Pd | 0.00215800  | 0.01107600  | 0.57829300  |
| P  | -2.29020400 | -0.01608800 | 0.21694600  |
| P  | 2.29238400  | 0.01574900  | 0.21301000  |
| C  | 2.90691800  | 1.57661300  | -0.53314800 |
| C  | 2.33391100  | 2.77000000  | -0.08140800 |
| C  | 3.91343000  | 1.62833800  | -1.50138400 |
| C  | 2.77376100  | 3.99415600  | -0.57200100 |
| H  | 1.52795600  | 2.72456500  | 0.65400900  |
| C  | 4.34548100  | 2.85408300  | -1.99997600 |
| H  | 4.35915600  | 0.70348600  | -1.87008300 |
| C  | 3.77996400  | 4.03702800  | -1.53344900 |
| H  | 2.32360000  | 4.91722300  | -0.20973500 |
| H  | 5.12755000  | 2.88502200  | -2.75730400 |
| H  | 4.12046100  | 4.99444300  | -1.92516500 |
| C  | 2.78976500  | -1.25309300 | -1.01958600 |
| C  | 3.98791900  | -1.96848100 | -0.95910000 |
| C  | 1.90028700  | -1.50194800 | -2.07117500 |
| C  | 4.28905100  | -2.91635000 | -1.93426100 |
| H  | 4.68826500  | -1.78809800 | -0.14289000 |
| C  | 2.20595500  | -2.44125800 | -3.04816000 |
| H  | 0.95439200  | -0.95618100 | -2.10521400 |
| C  | 3.40135800  | -3.15319200 | -2.97869900 |
| H  | 5.22292800  | -3.47371900 | -1.87521200 |
| H  | 1.50354400  | -2.62346000 | -3.86048900 |
| H  | 3.63799200  | -3.89803400 | -3.73713500 |
| C  | 3.47096300  | -0.27184400 | 1.59036800  |
| C  | 3.08347100  | -1.18337300 | 2.57808600  |
| C  | 4.71767900  | 0.35116800  | 1.69023300  |
| C  | 3.93325300  | -1.48113700 | 3.63663700  |

|    |             |             |             |
|----|-------------|-------------|-------------|
| H  | 2.09953000  | -1.65159600 | 2.50978800  |
| C  | 5.56372500  | 0.05980300  | 2.75635000  |
| H  | 5.02726400  | 1.07085700  | 0.93128800  |
| C  | 5.17490000  | -0.85747100 | 3.72792800  |
| H  | 3.62097300  | -2.19328900 | 4.39894000  |
| H  | 6.53187900  | 0.55339900  | 2.82920900  |
| H  | 5.83779900  | -1.08207200 | 4.56217100  |
| C  | -3.03239000 | 1.61876100  | -0.17376800 |
| C  | -2.23424500 | 2.53240600  | -0.87097600 |
| C  | -4.33898600 | 1.97803900  | 0.16680500  |
| C  | -2.74042700 | 3.77310400  | -1.23976200 |
| H  | -1.20439200 | 2.25863300  | -1.11326000 |
| C  | -4.84110300 | 3.22536800  | -0.19416800 |
| H  | -4.96795000 | 1.27982700  | 0.72021100  |
| C  | -4.04542900 | 4.12150700  | -0.90072200 |
| H  | -2.11112500 | 4.47417200  | -1.78599600 |
| H  | -5.85991400 | 3.49727500  | 0.07856800  |
| H  | -4.44039900 | 5.09650400  | -1.18244200 |
| C  | -3.42888500 | -0.67666200 | 1.49667200  |
| C  | -4.57275600 | -1.42695600 | 1.21276500  |
| C  | -3.12453100 | -0.37549300 | 2.82813400  |
| C  | -5.40226200 | -1.85846300 | 2.24403000  |
| H  | -4.81571600 | -1.67572400 | 0.17917100  |
| C  | -3.95913300 | -0.79747800 | 3.85623600  |
| H  | -2.21730400 | 0.18967700  | 3.05049400  |
| C  | -5.09940800 | -1.54138800 | 3.56459500  |
| H  | -6.28977600 | -2.44603100 | 2.01303600  |
| H  | -3.71388100 | -0.55455000 | 4.88902600  |
| H  | -5.74982900 | -1.88086600 | 4.36933300  |
| C  | -2.70386600 | -1.00870600 | -1.27414100 |
| C  | -1.89893000 | -2.11893100 | -1.55079300 |
| C  | -3.76683700 | -0.71050200 | -2.13142100 |
| C  | -2.15733400 | -2.92237700 | -2.65588400 |
| H  | -1.05198100 | -2.33328000 | -0.89475100 |
| C  | -4.02273900 | -1.51271800 | -3.23965600 |
| H  | -4.39521700 | 0.15897800  | -1.93435700 |
| C  | -3.22017500 | -2.61903800 | -3.50259400 |
| H  | -1.52019100 | -3.78181300 | -2.86105500 |
| H  | -4.85127400 | -1.26914600 | -3.90325400 |
| H  | -3.42042000 | -3.24170500 | -4.37334300 |
| A  |             |             |             |
| P  | -1.86001000 | 0.28360500  | -0.11395600 |
| Pd | 0.02517400  | -1.12487900 | -0.67048900 |

|   |             |             |             |
|---|-------------|-------------|-------------|
| P | 1.91163400  | 0.22805700  | -0.04309100 |
| C | 1.56491700  | 1.28556400  | 1.41511400  |
| C | 1.10357600  | 0.61996300  | 2.55834000  |
| C | 1.70708000  | 2.67226700  | 1.45596900  |
| C | 0.79392600  | 1.32175400  | 3.71546600  |
| H | 0.99447500  | -0.46667100 | 2.53924300  |
| C | 1.39128200  | 3.37708900  | 2.61533900  |
| H | 2.04888100  | 3.21454300  | 0.57509300  |
| C | 0.93800000  | 2.70707300  | 3.74587600  |
| H | 0.43198400  | 0.78581000  | 4.59187300  |
| H | 1.49246500  | 4.46170600  | 2.62587000  |
| H | 0.68991200  | 3.26297800  | 4.64874900  |
| C | 2.46762300  | 1.35751200  | -1.37774600 |
| C | 3.56613700  | 2.21057000  | -1.22505600 |
| C | 1.80292900  | 1.32013100  | -2.60538000 |
| C | 3.95763700  | 3.04450600  | -2.26552200 |
| H | 4.12453700  | 2.21255300  | -0.28781900 |
| C | 2.19892200  | 2.14923200  | -3.65139400 |
| H | 0.97242900  | 0.62114100  | -2.73410400 |
| C | 3.27008200  | 3.01920000  | -3.47726500 |
| H | 4.80977300  | 3.70975800  | -2.13585900 |
| H | 1.67415600  | 2.10918800  | -4.60460700 |
| H | 3.58228100  | 3.66894800  | -4.29340800 |
| C | 3.50441500  | -0.55535100 | 0.42972700  |
| C | 4.01578400  | -1.52870600 | -0.43217200 |
| C | 4.23043900  | -0.20329200 | 1.57195700  |
| C | 5.23011400  | -2.14549100 | -0.15713100 |
| H | 3.44951600  | -1.82854200 | -1.31407100 |
| C | 5.44855100  | -0.81864100 | 1.84179100  |
| H | 3.84536200  | 0.55500700  | 2.25345700  |
| C | 5.94939200  | -1.78959600 | 0.97955500  |
| H | 5.59956700  | -2.91964100 | -0.82711400 |
| H | 6.00881100  | -0.53742100 | 2.73252500  |
| H | 6.89908200  | -2.27556600 | 1.19849600  |
| C | -2.66175200 | -0.20738800 | 1.45777900  |
| C | -3.92700500 | 0.25810700  | 1.83190100  |
| C | -1.98534600 | -1.09007400 | 2.30069500  |
| C | -4.48793700 | -0.13492900 | 3.04122900  |
| H | -4.47691100 | 0.92632100  | 1.16728700  |
| C | -2.54731100 | -1.48835100 | 3.50904000  |
| H | -1.01684200 | -1.47934000 | 1.98029800  |
| C | -3.79717900 | -1.00552700 | 3.88184800  |
| H | -5.47289600 | 0.23131100  | 3.32635700  |
| H | -2.01325900 | -2.18467800 | 4.15392400  |

|   |             |             |             |
|---|-------------|-------------|-------------|
| H | -4.24297200 | -1.31852600 | 4.82475200  |
| C | -1.51690500 | 2.07664500  | 0.07297500  |
| C | -0.85913300 | 2.70419300  | -0.99135400 |
| C | -1.87089800 | 2.83645000  | 1.18807800  |
| C | -0.56782700 | 4.06113700  | -0.95080400 |
| H | -0.57755200 | 2.11921600  | -1.86802800 |
| C | -1.57858800 | 4.19787500  | 1.23025000  |
| H | -2.37314300 | 2.36454400  | 2.03200700  |
| C | -0.93136300 | 4.81336700  | 0.16460600  |
| H | -0.05087300 | 4.52876800  | -1.78854200 |
| H | -1.85614900 | 4.77875800  | 2.10912600  |
| H | -0.70483200 | 5.87794800  | 0.20361500  |
| C | -3.28466700 | 0.29099900  | -1.28198200 |
| C | -3.84004200 | -0.94827300 | -1.62748000 |
| C | -3.84214900 | 1.45879100  | -1.80970500 |
| C | -4.92672900 | -1.00931200 | -2.49146400 |
| H | -3.44098900 | -1.87500500 | -1.20639500 |
| C | -4.92604000 | 1.38922000  | -2.68156500 |
| H | -3.43582100 | 2.43235600  | -1.53866500 |
| C | -5.46825400 | 0.15679900  | -3.02654300 |
| H | -5.35284300 | -1.97850100 | -2.74587900 |
| H | -5.34897000 | 2.30748200  | -3.08692300 |
| H | -6.31667200 | 0.10454600  | -3.70732600 |
| C | 1.39949300  | -3.78978200 | -0.69522300 |
| C | 0.58490300  | -3.02591100 | -1.64542300 |
| C | -0.81853500 | -2.94961300 | -1.50405800 |
| C | -1.49061700 | -3.59976900 | -0.36802100 |
| C | -0.61767100 | -4.19456100 | 0.67550000  |
| C | 0.71230200  | -4.27529400 | 0.52992100  |
| H | 1.06073900  | -2.82710100 | -2.60697200 |
| H | -1.45638100 | -2.70739400 | -2.35544500 |
| H | -1.14129700 | -4.59796300 | 1.54289600  |
| H | 1.35567500  | -4.75446500 | 1.26753900  |
| O | -2.71159000 | -3.67493200 | -0.25926900 |
| O | 2.58122400  | -4.05807600 | -0.88570400 |

**TS1**

|   |             |             |             |
|---|-------------|-------------|-------------|
| C | -0.00967300 | -1.71936700 | -3.30227500 |
| C | -0.97315200 | -0.74922500 | -3.00419300 |
| C | -0.72440700 | 0.66970000  | -3.35883100 |
| C | 0.63361100  | 0.99349300  | -3.76803700 |
| C | 1.60224500  | 0.03781500  | -3.81260500 |
| C | 1.29550600  | -1.33799000 | -3.53985200 |
| H | -2.01340800 | -1.04685000 | -2.89790400 |

|    |             |             |             |
|----|-------------|-------------|-------------|
| O  | 2.23350500  | -2.26077700 | -3.36504900 |
| H  | -0.22810500 | -2.77529800 | -3.16897900 |
| O  | -1.62493500 | 1.52315500  | -3.29263400 |
| H  | 2.63592700  | 0.28477500  | -4.04700100 |
| H  | 0.83827200  | 2.03578500  | -4.00823500 |
| C  | 0.71128300  | -4.50785300 | 0.34655600  |
| C  | 0.81354500  | -3.60823700 | -0.71849400 |
| C  | 1.60315200  | -2.44372200 | -0.66429300 |
| C  | 2.29673900  | -2.26201100 | 0.54905500  |
| C  | 2.20328200  | -3.14419000 | 1.61849900  |
| C  | 1.40441500  | -4.28950800 | 1.53634000  |
| H  | 0.08454200  | -5.39827300 | 0.25027700  |
| H  | 0.26933200  | -3.85867100 | -1.63246700 |
| H  | 2.97754400  | -1.41300000 | 0.64558000  |
| H  | 2.76974400  | -2.95089000 | 2.53476800  |
| B  | 3.09632400  | -2.18178600 | -2.21965700 |
| O  | 3.67593800  | -0.94550200 | -1.98315500 |
| H  | 4.37900800  | -1.03462400 | -1.32824200 |
| O  | 3.86295800  | -3.30430400 | -1.95332600 |
| H  | 3.33599000  | -4.10428000 | -2.06020800 |
| Pd | -0.03738400 | -0.64580500 | -0.89985200 |
| P  | 1.39668800  | 1.12057800  | 0.49562100  |
| P  | -2.18237300 | -0.07815200 | 0.01800600  |
| C  | 1.09263700  | 2.82672800  | -0.11974700 |
| C  | 1.86854700  | 3.92878200  | 0.26987100  |
| C  | 0.08385900  | 3.01983700  | -1.06057100 |
| C  | 1.61219400  | 5.18902700  | -0.25533200 |
| H  | 2.68945600  | 3.79703500  | 0.97545500  |
| C  | -0.16477800 | 4.27779400  | -1.60158100 |
| H  | -0.51418900 | 2.17705400  | -1.39435100 |
| C  | 0.59611800  | 5.36596700  | -1.19499700 |
| H  | 2.21933900  | 6.03748000  | 0.05749200  |
| H  | -0.94882000 | 4.37905500  | -2.35140800 |
| H  | 0.41232100  | 6.35352300  | -1.61608600 |
| C  | 3.23839200  | 1.14219900  | 0.55126800  |
| C  | 3.96898200  | 0.73662000  | 1.67186100  |
| C  | 3.92797800  | 1.53980900  | -0.59923000 |
| C  | 5.36068900  | 0.72761100  | 1.64104000  |
| H  | 3.44914400  | 0.42165600  | 2.57723700  |
| C  | 5.31667100  | 1.54827100  | -0.62295400 |
| H  | 3.36903700  | 1.82741100  | -1.48970500 |
| C  | 6.03729900  | 1.13617600  | 0.49623500  |
| H  | 5.91722400  | 0.40715900  | 2.52041500  |
| H  | 5.83847100  | 1.85974700  | -1.52632100 |

|   |             |             |             |
|---|-------------|-------------|-------------|
| H | 7.12580200  | 1.13285300  | 0.47404100  |
| C | 0.99212700  | 1.18118100  | 2.29315200  |
| C | 0.89370300  | 2.36389700  | 3.03245500  |
| C | 0.77900300  | -0.03875800 | 2.94387300  |
| C | 0.57059500  | 2.32609600  | 4.38489000  |
| H | 1.03705200  | 3.32720000  | 2.54473000  |
| C | 0.46737500  | -0.07680300 | 4.29974400  |
| H | 0.85712200  | -0.97156600 | 2.38381400  |
| C | 0.35328400  | 1.10660000  | 5.02168900  |
| H | 0.48655500  | 3.25717400  | 4.94432300  |
| H | 0.30800800  | -1.03859600 | 4.78568900  |
| H | 0.09728900  | 1.08076100  | 6.07976700  |
| C | -2.57186900 | 1.66722400  | 0.43971400  |
| C | -2.11044400 | 2.20581900  | 1.64720200  |
| C | -3.21312900 | 2.51540100  | -0.47023100 |
| C | -2.30089000 | 3.55106800  | 1.94256600  |
| H | -1.60304400 | 1.57063300  | 2.37178900  |
| C | -3.39903000 | 3.85989100  | -0.17188700 |
| H | -3.56418300 | 2.13887500  | -1.42635000 |
| C | -2.94508100 | 4.38353200  | 1.03405400  |
| H | -1.93901300 | 3.94517900  | 2.89153900  |
| H | -3.90040500 | 4.50223700  | -0.89402900 |
| H | -3.09140300 | 5.43765200  | 1.26380500  |
| C | -2.28807000 | -0.97299500 | 1.61324400  |
| C | -1.55474400 | -2.15426400 | 1.74984800  |
| C | -3.16790900 | -0.59551900 | 2.63476900  |
| C | -1.68775700 | -2.94094600 | 2.89046300  |
| H | -0.87559900 | -2.47369200 | 0.95568200  |
| C | -3.29083000 | -1.37645400 | 3.77782700  |
| H | -3.76881200 | 0.30757700  | 2.53195100  |
| C | -2.55233500 | -2.55101900 | 3.90761800  |
| H | -1.11100700 | -3.86166700 | 2.97091800  |
| H | -3.97615000 | -1.07194200 | 4.56725700  |
| H | -2.65772400 | -3.16431500 | 4.80136900  |
| C | -3.69510900 | -0.69891200 | -0.84459600 |
| C | -4.48054400 | -1.70833300 | -0.27332000 |
| C | -4.06961200 | -0.19036900 | -2.09885700 |
| C | -5.61837900 | -2.17592100 | -0.92348600 |
| H | -4.21343600 | -2.13873000 | 0.68959600  |
| C | -5.21387400 | -0.65576000 | -2.73719400 |
| H | -3.44664700 | 0.55091200  | -2.60241100 |
| C | -5.99476700 | -1.64698400 | -2.15227200 |
| H | -6.21375700 | -2.96000100 | -0.45836500 |
| H | -5.48763900 | -0.24243400 | -3.70654300 |



|   |             |             |             |
|---|-------------|-------------|-------------|
| H | -6.88764800 | -2.01240200 | -2.65687600 |
| C | 1.33769200  | -5.26398800 | 2.67497200  |
| H | 0.47737100  | -5.94023300 | 2.58075000  |
| H | 2.23871300  | -5.89289000 | 2.71929600  |
| H | 1.26406200  | -4.75083900 | 3.64449700  |

**IM1**

|    |             |             |             |
|----|-------------|-------------|-------------|
| C  | -0.00967300 | -1.71936700 | -3.30227500 |
| C  | -0.97315200 | -0.74922500 | -3.00419300 |
| C  | -0.72440700 | 0.66970000  | -3.35883100 |
| C  | 0.63361100  | 0.99349300  | -3.76803700 |
| C  | 1.60224500  | 0.03781500  | -3.81260500 |
| C  | 1.29550600  | -1.33799000 | -3.53985200 |
| H  | -2.01340800 | -1.04685000 | -2.89790400 |
| O  | 2.23350500  | -2.26077700 | -3.36504900 |
| H  | -0.22810500 | -2.77529800 | -3.16897900 |
| O  | -1.62493500 | 1.52315500  | -3.29263400 |
| H  | 2.63592700  | 0.28477500  | -4.04700100 |
| H  | 0.83827200  | 2.03578500  | -4.00823500 |
| C  | 0.71128300  | -4.50785300 | 0.34655600  |
| C  | 0.81354500  | -3.60823700 | -0.71849400 |
| C  | 1.60315200  | -2.44372200 | -0.66429300 |
| C  | 2.29673900  | -2.26201100 | 0.54905500  |
| C  | 2.20328200  | -3.14419000 | 1.61849900  |
| C  | 1.40441500  | -4.28950800 | 1.53634000  |
| H  | 0.08454200  | -5.39827300 | 0.25027700  |
| H  | 0.26933200  | -3.85867100 | -1.63246700 |
| H  | 2.97754400  | -1.41300000 | 0.64558000  |
| H  | 2.76974400  | -2.95089000 | 2.53476800  |
| B  | 3.09632400  | -2.18178600 | -2.21965700 |
| O  | 3.67593800  | -0.94550200 | -1.98315500 |
| H  | 4.37900800  | -1.03462400 | -1.32824200 |
| O  | 3.86295800  | -3.30430400 | -1.95332600 |
| H  | 3.33599000  | -4.10428000 | -2.06020800 |
| Pd | -0.03738400 | -0.64580500 | -0.89985200 |
| P  | 1.39668800  | 1.12057800  | 0.49562100  |
| P  | -2.18237300 | -0.07815200 | 0.01800600  |
| C  | 1.09263700  | 2.82672800  | -0.11974700 |
| C  | 1.86854700  | 3.92878200  | 0.26987100  |
| C  | 0.08385900  | 3.01983700  | -1.06057100 |
| C  | 1.61219400  | 5.18902700  | -0.25533200 |
| H  | 2.68945600  | 3.79703500  | 0.97545500  |
| C  | -0.16477800 | 4.27779400  | -1.60158100 |
| H  | -0.51418900 | 2.17705400  | -1.39435100 |

|   |             |             |             |
|---|-------------|-------------|-------------|
| C | 0.59611800  | 5.36596700  | -1.19499700 |
| H | 2.21933900  | 6.03748000  | 0.05749200  |
| H | -0.94882000 | 4.37905500  | -2.35140800 |
| H | 0.41232100  | 6.35352300  | -1.61608600 |
| C | 3.23839200  | 1.14219900  | 0.55126800  |
| C | 3.96898200  | 0.73662000  | 1.67186100  |
| C | 3.92797800  | 1.53980900  | -0.59923000 |
| C | 5.36068900  | 0.72761100  | 1.64104000  |
| H | 3.44914400  | 0.42165600  | 2.57723700  |
| C | 5.31667100  | 1.54827100  | -0.62295400 |
| H | 3.36903700  | 1.82741100  | -1.48970500 |
| C | 6.03729900  | 1.13617600  | 0.49623500  |
| H | 5.91722400  | 0.40715900  | 2.52041500  |
| H | 5.83847100  | 1.85974700  | -1.52632100 |
| H | 7.12580200  | 1.13285300  | 0.47404100  |
| C | 0.99212700  | 1.18118100  | 2.29315200  |
| C | 0.89370300  | 2.36389700  | 3.03245500  |
| C | 0.77900300  | -0.03875800 | 2.94387300  |
| C | 0.57059500  | 2.32609600  | 4.38489000  |
| H | 1.03705200  | 3.32720000  | 2.54473000  |
| C | 0.46737500  | -0.07680300 | 4.29974400  |
| H | 0.85712200  | -0.97156600 | 2.38381400  |
| C | 0.35328400  | 1.10660000  | 5.02168900  |
| H | 0.48655500  | 3.25717400  | 4.94432300  |
| H | 0.30800800  | -1.03859600 | 4.78568900  |
| H | 0.09728900  | 1.08076100  | 6.07976700  |
| C | -2.57186900 | 1.66722400  | 0.43971400  |
| C | -2.11044400 | 2.20581900  | 1.64720200  |
| C | -3.21312900 | 2.51540100  | -0.47023100 |
| C | -2.30089000 | 3.55106800  | 1.94256600  |
| H | -1.60304400 | 1.57063300  | 2.37178900  |
| C | -3.39903000 | 3.85989100  | -0.17188700 |
| H | -3.56418300 | 2.13887500  | -1.42635000 |
| C | -2.94508100 | 4.38353200  | 1.03405400  |
| H | -1.93901300 | 3.94517900  | 2.89153900  |
| H | -3.90040500 | 4.50223700  | -0.89402900 |
| H | -3.09140300 | 5.43765200  | 1.26380500  |
| C | -2.28807000 | -0.97299500 | 1.61324400  |
| C | -1.55474400 | -2.15426400 | 1.74984800  |
| C | -3.16790900 | -0.59551900 | 2.63476900  |
| C | -1.68775700 | -2.94094600 | 2.89046300  |
| H | -0.87559900 | -2.47369200 | 0.95568200  |
| C | -3.29083000 | -1.37645400 | 3.77782700  |
| H | -3.76881200 | 0.30757700  | 2.53195100  |

|   |             |             |             |
|---|-------------|-------------|-------------|
| C | -2.55233500 | -2.55101900 | 3.90761800  |
| H | -1.11100700 | -3.86166700 | 2.97091800  |
| H | -3.97615000 | -1.07194200 | 4.56725700  |
| H | -2.65772400 | -3.16431500 | 4.80136900  |
| C | -3.69510900 | -0.69891200 | -0.84459600 |
| C | -4.48054400 | -1.70833300 | -0.27332000 |
| C | -4.06961200 | -0.19036900 | -2.09885700 |
| C | -5.61837900 | -2.17592100 | -0.92348600 |
| H | -4.21343600 | -2.13873000 | 0.68959600  |
| C | -5.21387400 | -0.65576000 | -2.73719400 |
| H | -3.44664700 | 0.55091200  | -2.60241100 |
| C | -5.99476700 | -1.64698400 | -2.15227200 |
| H | -6.21375700 | -2.96000100 | -0.45836500 |
| H | -5.48763900 | -0.24243400 | -3.70654300 |
| H | -6.88764800 | -2.01240200 | -2.65687600 |
| C | 1.33769200  | -5.26398800 | 2.67497200  |
| H | 0.47737100  | -5.94023300 | 2.58075000  |
| H | 2.23871300  | -5.89289000 | 2.71929600  |
| H | 1.26406200  | -4.75083900 | 3.64449700  |

## IM2

|   |             |             |             |
|---|-------------|-------------|-------------|
| C | 2.51259100  | -2.74100800 | 1.30724600  |
| C | 1.26996700  | -3.23655100 | 1.23323800  |
| C | 0.45417000  | -3.11915500 | -0.00039500 |
| C | 1.02555900  | -2.32038700 | -1.10386900 |
| C | 2.34158500  | -1.82406400 | -1.02268300 |
| C | 3.15422700  | -2.05523600 | 0.16102800  |
| H | 0.79746000  | -3.77232600 | 2.05644800  |
| O | 4.34298400  | -1.72424500 | 0.25164700  |
| H | 3.13472500  | -2.84422400 | 2.19572100  |
| O | -0.63520900 | -3.67617100 | -0.07451600 |
| H | 2.87223400  | -1.48593500 | -1.91318700 |
| H | 0.52979400  | -2.43450000 | -2.06910300 |
| C | 3.24333700  | 1.19983400  | 2.05847600  |
| C | 4.02688000  | 1.03790700  | 0.91191200  |
| C | 3.52812800  | 1.32321300  | -0.35771500 |
| C | 2.20581400  | 1.80466400  | -0.44745300 |
| C | 1.41883000  | 1.96795400  | 0.69923400  |
| C | 1.93577200  | 1.66074500  | 1.97374600  |
| H | 3.66607100  | 0.97532400  | 3.03895000  |
| H | 5.04607500  | 0.66852400  | 1.01834400  |
| H | 1.82438800  | 2.13149500  | -1.41711000 |
| H | 0.44156600  | 2.44519900  | 0.62871600  |
| B | 4.34980600  | 1.04431200  | -1.66428700 |

|    |             |             |             |
|----|-------------|-------------|-------------|
| O  | 4.19654700  | 1.90506600  | -2.71594300 |
| H  | 4.71071800  | 1.58530000  | -3.46973500 |
| O  | 5.16000700  | -0.03566600 | -1.80018900 |
| H  | 5.04546000  | -0.67735100 | -1.06493800 |
| Pd | 0.81317500  | -0.28660100 | -0.43539400 |
| P  | -1.51780700 | 0.17501000  | -0.22425300 |
| C  | -2.69722800 | -0.42574800 | -1.49486900 |
| C  | -3.66512100 | 0.39141000  | -2.08574500 |
| C  | -2.63641500 | -1.78057000 | -1.84462500 |
| C  | -4.55117100 | -0.13426500 | -3.02196200 |
| H  | -3.73289400 | 1.44395000  | -1.81342500 |
| C  | -3.53029700 | -2.30039100 | -2.77326400 |
| H  | -1.90911300 | -2.44350900 | -1.36971100 |
| C  | -4.48473500 | -1.47917300 | -3.36812000 |
| H  | -5.29942600 | 0.51290400  | -3.47708600 |
| H  | -3.48009800 | -3.35680300 | -3.03173600 |
| H  | -5.18027500 | -1.88943200 | -4.09870200 |
| C  | -1.88642800 | 1.96636500  | -0.09873000 |
| C  | -2.35583000 | 2.56093700  | 1.07381500  |
| C  | -1.52080200 | 2.78435000  | -1.17681500 |
| C  | -2.45628900 | 3.94780900  | 1.16730600  |
| H  | -2.63474500 | 1.93994000  | 1.92512200  |
| C  | -1.63649100 | 4.16515200  | -1.08712500 |
| H  | -1.13099400 | 2.33085400  | -2.09093900 |
| C  | -2.09925200 | 4.75073300  | 0.09041300  |
| H  | -2.81818100 | 4.39963500  | 2.08961000  |
| H  | -1.35223800 | 4.78823600  | -1.93339100 |
| H  | -2.17579300 | 5.83386800  | 0.16730500  |
| C  | -2.19253400 | -0.52190200 | 1.32804900  |
| C  | -3.56363000 | -0.69822900 | 1.53630200  |
| C  | -1.29697000 | -0.85265100 | 2.34783100  |
| C  | -4.02696300 | -1.19186600 | 2.75059400  |
| H  | -4.26912300 | -0.44977000 | 0.74227100  |
| C  | -1.76141600 | -1.34167800 | 3.56472100  |
| H  | -0.22439100 | -0.73121200 | 2.17218400  |
| C  | -3.12757500 | -1.51196700 | 3.76508100  |
| H  | -5.09559600 | -1.33148300 | 2.90561800  |
| H  | -1.05447100 | -1.59747300 | 4.35247200  |
| H  | -3.49507000 | -1.90165700 | 4.71309200  |
| C  | 1.09027600  | 1.89755200  | 3.18816700  |
| H  | 0.87606100  | 2.96830200  | 3.31821700  |
| H  | 0.11573100  | 1.39327200  | 3.10589200  |
| H  | 1.58159500  | 1.54121900  | 4.10170800  |

**TS2**

|    |             |             |             |
|----|-------------|-------------|-------------|
| C  | 1.28047400  | -3.14497700 | 1.15879000  |
| C  | -0.03575600 | -3.41482500 | 1.27035000  |
| C  | -0.92940100 | -3.36820800 | 0.09245300  |
| C  | -0.27604300 | -3.07955800 | -1.19047700 |
| C  | 1.12670600  | -3.00243400 | -1.31462400 |
| C  | 1.88354400  | -2.80036100 | -0.12744900 |
| H  | -0.50767900 | -3.64208200 | 2.22515300  |
| O  | 3.17461000  | -2.49912600 | -0.09947100 |
| H  | 1.94944200  | -3.13317000 | 2.01894900  |
| O  | -2.14396300 | -3.53673900 | 0.20401800  |
| H  | 1.62690300  | -2.93244500 | -2.27755700 |
| H  | -0.89867700 | -3.16869900 | -2.07927000 |
| C  | 2.80282300  | 1.76668200  | 1.45659500  |
| C  | 2.52885000  | 0.47359400  | 1.02153500  |
| C  | 2.40210800  | 0.13925600  | -0.34596200 |
| C  | 2.55490400  | 1.21552300  | -1.24902400 |
| C  | 2.84110500  | 2.50365300  | -0.83111100 |
| C  | 2.95015300  | 2.80446100  | 0.53333500  |
| H  | 2.89367600  | 1.98712900  | 2.52284200  |
| H  | 2.42464600  | -0.31893900 | 1.77029100  |
| H  | 2.46888400  | 1.00677600  | -2.31879400 |
| H  | 2.96431700  | 3.30883000  | -1.55987300 |
| B  | 3.63917900  | -1.39334100 | -0.94272000 |
| O  | 3.42611300  | -1.53806100 | -2.31787700 |
| H  | 4.12860500  | -1.06093800 | -2.77523800 |
| O  | 4.89932600  | -0.92012100 | -0.58618900 |
| H  | 5.00775000  | -0.91238300 | 0.37053500  |
| Pd | 0.53124800  | -1.01197000 | -0.60095000 |
| P  | -1.19885500 | 0.51025500  | -0.11594200 |
| C  | -2.79013300 | 0.42378200  | -1.02403900 |
| C  | -3.54338200 | 1.56841600  | -1.30327400 |
| C  | -3.26732200 | -0.82638800 | -1.43732900 |
| C  | -4.75024300 | 1.46469100  | -1.98758300 |
| H  | -3.18883500 | 2.54858100  | -0.98683000 |
| C  | -4.48138600 | -0.92473600 | -2.10739200 |
| H  | -2.71433600 | -1.73654500 | -1.19981000 |
| C  | -5.22060000 | 0.21997500  | -2.39141800 |
| H  | -5.32500600 | 2.36373200  | -2.20441300 |
| H  | -4.84745400 | -1.90378100 | -2.41129000 |
| H  | -6.16623900 | 0.14076400  | -2.92541800 |
| C  | -0.87600500 | 2.30649800  | -0.03144600 |
| C  | -1.19158400 | 3.09447700  | 1.07868700  |
| C  | -0.34012800 | 2.91497000  | -1.16996600 |

|   |             |             |             |
|---|-------------|-------------|-------------|
| C | -0.96414900 | 4.46689800  | 1.05144700  |
| H | -1.62178700 | 2.63393900  | 1.96760300  |
| C | -0.13045100 | 4.28865400  | -1.20287600 |
| H | -0.08828000 | 2.30398600  | -2.03808200 |
| C | -0.43763700 | 5.06625600  | -0.08930000 |
| H | -1.21189100 | 5.07173600  | 1.92227400  |
| H | 0.28317400  | 4.75155400  | -2.09778600 |
| H | -0.26947100 | 6.14210700  | -0.11232300 |
| C | -1.58810900 | -0.01462300 | 1.59703600  |
| C | -2.68119000 | -0.83488400 | 1.88499700  |
| C | -0.65426300 | 0.25719000  | 2.60812200  |
| C | -2.83905300 | -1.36964000 | 3.16090500  |
| H | -3.40641700 | -1.08014400 | 1.11158000  |
| C | -0.82429400 | -0.26621400 | 3.88248200  |
| H | 0.21894900  | 0.87217200  | 2.38568000  |
| C | -1.91655800 | -1.08644700 | 4.16127500  |
| H | -3.69007400 | -2.01618000 | 3.36689100  |
| H | -0.09614200 | -0.04111000 | 4.66045400  |
| H | -2.04414900 | -1.50637900 | 5.15783300  |
| C | 3.18333900  | 4.21626400  | 0.97178800  |
| H | 4.06075100  | 4.65400700  | 0.47642600  |
| H | 2.31918800  | 4.84635200  | 0.70796800  |
| H | 3.33308100  | 4.28934700  | 2.05565300  |

### IM3

|   |             |             |             |
|---|-------------|-------------|-------------|
| C | 1.45779600  | -2.81778400 | 1.21988300  |
| C | 0.17123100  | -3.21544100 | 1.38295300  |
| C | -0.75534400 | -3.29783600 | 0.24705600  |
| C | -0.16359900 | -2.97770200 | -1.05307000 |
| C | 1.21885300  | -2.77148400 | -1.22937100 |
| C | 1.99891600  | -2.49821800 | -0.08497300 |
| H | -0.23479400 | -3.45424400 | 2.36451600  |
| O | 3.33514800  | -2.23968000 | -0.08434500 |
| H | 2.13977500  | -2.71249600 | 2.06336400  |
| O | -1.95233400 | -3.57597100 | 0.39191600  |
| H | 1.66149800  | -2.69314600 | -2.21887800 |
| H | -0.79730600 | -3.12732600 | -1.92569800 |
| C | 3.45527300  | 1.68103000  | 1.49589400  |
| C | 2.37464800  | 0.82675000  | 1.26805000  |
| C | 1.85289900  | 0.65472900  | -0.01653100 |
| C | 2.45526100  | 1.36180400  | -1.06481200 |
| C | 3.52974100  | 2.21623700  | -0.83180400 |
| C | 4.04915700  | 2.39081900  | 0.45340900  |
| H | 3.84527400  | 1.79938800  | 2.50935700  |

|    |             |             |             |
|----|-------------|-------------|-------------|
| H  | 1.94409200  | 0.28356200  | 2.11260700  |
| H  | 2.08816900  | 1.24003700  | -2.08643200 |
| H  | 3.98404800  | 2.75477200  | -1.66682900 |
| B  | 4.08034600  | -1.63616700 | -1.07406100 |
| O  | 3.68544800  | -1.64755800 | -2.37749200 |
| H  | 4.30344200  | -1.13216500 | -2.91062800 |
| O  | 5.27238000  | -1.07663200 | -0.72778600 |
| H  | 5.36233200  | -1.02193800 | 0.23134900  |
| Pd | 0.46603600  | -0.79466300 | -0.42036800 |
| P  | -1.42187000 | 0.51592700  | -0.07808900 |
| C  | -2.85705800 | 0.18306800  | -1.16778600 |
| C  | -3.53735000 | 1.21917100  | -1.81493700 |
| C  | -3.24759900 | -1.14413200 | -1.39937800 |
| C  | -4.59202200 | 0.93541200  | -2.67758900 |
| H  | -3.24521100 | 2.25565900  | -1.65168800 |
| C  | -4.31214400 | -1.41632600 | -2.25040600 |
| H  | -2.74529900 | -1.97609400 | -0.89821500 |
| C  | -4.98193100 | -0.38051600 | -2.89644400 |
| H  | -5.11004700 | 1.75139700  | -3.17915400 |
| H  | -4.61409800 | -2.44987000 | -2.41111400 |
| H  | -5.80841800 | -0.60073300 | -3.57034800 |
| C  | -1.33380700 | 2.33633200  | -0.03838900 |
| C  | -2.14407000 | 3.09248300  | 0.81416300  |
| C  | -0.51768200 | 2.98679300  | -0.96591900 |
| C  | -2.12657000 | 4.48088300  | 0.74312900  |
| H  | -2.79461000 | 2.59216400  | 1.53150600  |
| C  | -0.50438000 | 4.37520700  | -1.03798800 |
| H  | 0.11410200  | 2.39786700  | -1.62897700 |
| C  | -1.30702500 | 5.12270000  | -0.18190600 |
| H  | -2.75832900 | 5.06505600  | 1.41027000  |
| H  | 0.13957700  | 4.87320100  | -1.76061600 |
| H  | -1.29457700 | 6.21013200  | -0.23478200 |
| C  | -1.91452400 | 0.03523000  | 1.61694200  |
| C  | -2.97680200 | -0.82653300 | 1.89008500  |
| C  | -1.07964600 | 0.45162700  | 2.66424500  |
| C  | -3.20191400 | -1.26437200 | 3.19317000  |
| H  | -3.62836600 | -1.17273000 | 1.09076700  |
| C  | -1.31507100 | 0.02088700  | 3.96180600  |
| H  | -0.24058000 | 1.11758100  | 2.45462500  |
| C  | -2.37586600 | -0.84458800 | 4.22792900  |
| H  | -4.02755200 | -1.94485700 | 3.39242300  |
| H  | -0.66627800 | 0.35658600  | 4.76940200  |
| H  | -2.55480300 | -1.19130600 | 5.24448500  |
| C  | 5.20584500  | 3.31613600  | 0.69321000  |

|            |             |             |             |
|------------|-------------|-------------|-------------|
| H          | 6.07715300  | 3.04254600  | 0.08199700  |
| H          | 4.95312200  | 4.35515500  | 0.43880900  |
| H          | 5.51992800  | 3.30277700  | 1.74437600  |
| <b>TS3</b> |             |             |             |
| C          | 0.52191700  | 3.75184200  | 1.26021300  |
| C          | 1.21997300  | 3.01518100  | 2.14755800  |
| C          | 2.33744300  | 2.15044500  | 1.70804600  |
| C          | 2.59321100  | 2.11684100  | 0.24481500  |
| C          | 2.01673300  | 3.08123300  | -0.60794900 |
| C          | 0.83362200  | 3.73280900  | -0.17238000 |
| H          | 1.00931100  | 3.02740200  | 3.21531400  |
| O          | 0.03913100  | 4.36799700  | -1.00612600 |
| H          | -0.32177300 | 4.37589200  | 1.55289400  |
| O          | 3.00345500  | 1.50135600  | 2.50007400  |
| H          | 2.33613400  | 3.21326600  | -1.64122800 |
| H          | 3.47507000  | 1.55061900  | -0.05753000 |
| Pd         | 0.60042700  | 1.39598800  | -0.45365600 |
| P          | 0.76753800  | -0.92910600 | -0.25993600 |
| C          | 1.87881900  | -1.65014500 | -1.52227000 |
| C          | 2.01244100  | -3.03667100 | -1.65620800 |
| C          | 2.61347900  | -0.80734400 | -2.35820700 |
| C          | 2.87520300  | -3.56715300 | -2.60628100 |
| H          | 1.43321100  | -3.70022700 | -1.01292300 |
| C          | 3.47665400  | -1.34018500 | -3.31150700 |
| H          | 2.49166100  | 0.27343500  | -2.26385800 |
| C          | 3.60830900  | -2.71895600 | -3.43411200 |
| H          | 2.97446900  | -4.64674000 | -2.70566400 |
| H          | 4.04358100  | -0.67643800 | -3.96199000 |
| H          | 4.28206800  | -3.13693900 | -4.18029600 |
| C          | -0.72039000 | -1.98075400 | -0.35252500 |
| C          | -0.93738400 | -3.07868400 | 0.48397400  |
| C          | -1.66925600 | -1.65474500 | -1.32587300 |
| C          | -2.09382500 | -3.84059800 | 0.34541100  |
| H          | -0.20737300 | -3.33157100 | 1.25304400  |
| C          | -2.81740400 | -2.42316600 | -1.46764100 |
| H          | -1.50702200 | -0.78345100 | -1.96237900 |
| C          | -3.03279100 | -3.51295900 | -0.62833000 |
| H          | -2.26181500 | -4.69296500 | 1.00231000  |
| H          | -3.55700400 | -2.15651500 | -2.22016500 |
| H          | -3.94200000 | -4.10436100 | -0.72837300 |
| C          | 1.54287000  | -1.33407100 | 1.34106500  |
| C          | 2.87247400  | -1.74494300 | 1.44139800  |
| C          | 0.81456000  | -1.07971600 | 2.51035100  |



|   |             |             |             |
|---|-------------|-------------|-------------|
| C | 3.45845200  | -1.91726100 | 2.69221900  |
| H | 3.45711800  | -1.92933500 | 0.54028500  |
| C | 1.39850900  | -1.26716600 | 3.75523300  |
| H | -0.21908600 | -0.73378700 | 2.43994600  |
| C | 2.72395900  | -1.68510900 | 3.84781400  |
| H | 4.49814800  | -2.23271900 | 2.75959300  |
| H | 0.82198200  | -1.07281600 | 4.65805400  |
| H | 3.18603700  | -1.81810200 | 4.82440000  |
| C | -3.20529300 | -0.21150900 | 1.61223400  |
| C | -2.58976700 | 0.71053600  | 0.77635500  |
| C | -3.19196100 | 1.14495500  | -0.41112200 |
| C | -4.46267500 | 0.63621700  | -0.70413800 |
| C | -5.07663100 | -0.30156700 | 0.11923700  |
| C | -4.45090700 | -0.75186700 | 1.28246800  |
| H | -2.71572900 | -0.53308100 | 2.53493400  |
| H | -1.60495100 | 1.10585100  | 1.04876500  |
| H | -4.97184500 | 0.97755700  | -1.60555500 |
| H | -6.05911500 | -0.69909000 | -0.14226800 |
| C | -5.07789800 | -1.80462100 | 2.14571800  |
| H | -6.14602400 | -1.92636900 | 1.92660200  |
| H | -4.59486800 | -2.78131300 | 1.98664400  |
| H | -4.97598500 | -1.56911100 | 3.21344100  |
| B | -2.47410700 | 2.14125300  | -1.39265100 |
| O | -1.13264800 | 2.29550500  | -1.45467600 |
| H | -0.60045600 | 3.57358900  | -1.39214700 |
| O | -3.30335300 | 2.86769500  | -2.22101600 |
| H | -2.77326500 | 3.39653100  | -2.83083700 |

#### IM4

|    |             |             |             |
|----|-------------|-------------|-------------|
| C  | 0.74378600  | 3.70749700  | 1.22290900  |
| C  | 1.33936100  | 2.94213000  | 2.16207600  |
| C  | 2.40558700  | 1.98682200  | 1.79712500  |
| C  | 2.72528200  | 1.90193500  | 0.34832700  |
| C  | 2.28746300  | 2.90186700  | -0.54613900 |
| C  | 1.13290500  | 3.63390400  | -0.18489700 |
| H  | 1.07667300  | 2.99863300  | 3.21652700  |
| O  | 0.46853100  | 4.37695300  | -1.07481800 |
| H  | -0.06420200 | 4.39907700  | 1.45867400  |
| O  | 2.98191300  | 1.30193600  | 2.62882900  |
| H  | 2.67689700  | 2.99480800  | -1.55943100 |
| H  | 3.56566200  | 1.25383900  | 0.09736300  |
| Pd | 0.68935500  | 1.38619400  | -0.43310300 |
| P  | 0.67389200  | -0.95117100 | -0.26368000 |
| C  | 1.76492900  | -1.72413200 | -1.51202900 |

|   |             |             |             |
|---|-------------|-------------|-------------|
| C | 1.82120200  | -3.11566600 | -1.64908700 |
| C | 2.56025700  | -0.92223200 | -2.33239600 |
| C | 2.66929800  | -3.69180000 | -2.58547000 |
| H | 1.19424400  | -3.74727000 | -1.01838400 |
| C | 3.40839500  | -1.50105000 | -3.27245600 |
| H | 2.49683500  | 0.16346300  | -2.23776000 |
| C | 3.46422200  | -2.88467400 | -3.39715400 |
| H | 2.70890000  | -4.77497900 | -2.68691300 |
| H | 4.02229500  | -0.86848200 | -3.91136000 |
| H | 4.12610600  | -3.33806000 | -4.13316900 |
| C | -0.86819200 | -1.91780800 | -0.39669600 |
| C | -1.17632300 | -2.97956600 | 0.45796500  |
| C | -1.75797400 | -1.57027900 | -1.41708700 |
| C | -2.37033800 | -3.67631400 | 0.29872400  |
| H | -0.48875900 | -3.25411500 | 1.25792000  |
| C | -2.94565200 | -2.27261700 | -1.57619400 |
| H | -1.52437100 | -0.72974800 | -2.07267000 |
| C | -3.25592000 | -3.32072800 | -0.71407900 |
| H | -2.60924400 | -4.50012100 | 0.96996100  |
| H | -3.64342400 | -1.98155300 | -2.35920400 |
| H | -4.19646400 | -3.85780500 | -0.82890500 |
| C | 1.39032300  | -1.41714500 | 1.34839100  |
| C | 2.69186100  | -1.90630800 | 1.46582700  |
| C | 0.65248800  | -1.14701500 | 2.50850200  |
| C | 3.24038700  | -2.14017100 | 2.72340800  |
| H | 3.28371200  | -2.10441100 | 0.57227300  |
| C | 1.19952900  | -1.39452600 | 3.75995600  |
| H | -0.35811000 | -0.74109600 | 2.42597300  |
| C | 2.49546600  | -1.89233400 | 3.86909600  |
| H | 4.25804500  | -2.51809400 | 2.80456600  |
| H | 0.61642000  | -1.18606300 | 4.65531400  |
| H | 2.92861600  | -2.07315300 | 4.85118500  |
| C | -3.19927400 | 0.07256300  | 1.66461900  |
| C | -2.51802100 | 0.92581400  | 0.80548800  |
| C | -3.05792700 | 1.31116100  | -0.42767100 |
| C | -4.33986200 | 0.84034400  | -0.73595600 |
| C | -5.02047300 | -0.02579100 | 0.11236900  |
| C | -4.45185200 | -0.44048900 | 1.31721200  |
| H | -2.75558800 | -0.21696700 | 2.62077200  |
| H | -1.53071500 | 1.30127500  | 1.09636600  |
| H | -4.80063700 | 1.15106100  | -1.67375500 |
| H | -6.00806000 | -0.39978400 | -0.16480500 |
| C | -5.14027900 | -1.43813000 | 2.19828100  |
| H | -6.21645200 | -1.48989400 | 1.99088200  |

|   |             |             |             |
|---|-------------|-------------|-------------|
| H | -4.72561600 | -2.44562000 | 2.03882600  |
| H | -5.01014100 | -1.20276200 | 3.26279400  |
| B | -2.26369200 | 2.18724600  | -1.46772700 |
| O | -0.92408000 | 2.27542700  | -1.53024300 |
| H | -0.21052200 | 3.73751500  | -1.48539700 |
| O | -3.04890300 | 2.87266100  | -2.37730800 |
| H | -2.47594800 | 3.30927900  | -3.02051300 |

**IM5**

|    |             |             |             |
|----|-------------|-------------|-------------|
| C  | 4.55078900  | -0.15727200 | 2.12104000  |
| C  | 3.71505900  | -1.26695800 | 2.03151100  |
| C  | 3.09704600  | -1.64138900 | 0.83210700  |
| C  | 3.43652600  | -0.88178800 | -0.29442800 |
| C  | 4.26230600  | 0.23743800  | -0.21803000 |
| C  | 4.81796200  | 0.63272300  | 0.99941900  |
| H  | 5.00137600  | 0.11162700  | 3.07973200  |
| H  | 3.52982100  | -1.85802600 | 2.93171900  |
| H  | 3.05893200  | -1.19118400 | -1.26957700 |
| H  | 4.48670900  | 0.81427900  | -1.11859000 |
| Pd | 0.34685600  | -0.48788000 | -1.04100000 |
| P  | -0.40158400 | 1.42597100  | 0.07947100  |
| C  | -2.13752900 | 1.91499300  | -0.16119100 |
| C  | -2.54866900 | 3.24736600  | -0.01721500 |
| C  | -3.08157300 | 0.92973800  | -0.45777800 |
| C  | -3.88672600 | 3.58362400  | -0.17231800 |
| H  | -1.81560900 | 4.02085500  | 0.21494400  |
| C  | -4.42032000 | 1.27339900  | -0.61998400 |
| H  | -2.77258600 | -0.11291200 | -0.55122800 |
| C  | -4.82198200 | 2.59600400  | -0.47851700 |
| H  | -4.20176400 | 4.61945000  | -0.05859700 |
| H  | -5.14688900 | 0.49918800  | -0.86177100 |
| H  | -5.86898900 | 2.86384200  | -0.61179200 |
| C  | 0.58505100  | 2.83193300  | -0.55450000 |
| C  | 1.79099600  | 3.19714500  | 0.04968000  |
| C  | 0.19801200  | 3.46135500  | -1.74533500 |
| C  | 2.59558600  | 4.17512100  | -0.52643300 |
| H  | 2.10719400  | 2.71920100  | 0.97632900  |
| C  | 1.00184800  | 4.44329900  | -2.31231000 |
| H  | -0.74321700 | 3.18706500  | -2.22552800 |
| C  | 2.20440400  | 4.79920900  | -1.70613400 |
| H  | 3.53167800  | 4.45142500  | -0.04307400 |
| H  | 0.68647200  | 4.93311900  | -3.23207100 |
| H  | 2.83491500  | 5.56549000  | -2.15375500 |
| C  | -0.11981100 | 1.40413600  | 1.87983800  |

|   |             |             |             |
|---|-------------|-------------|-------------|
| C | 1.06101000  | 0.81581000  | 2.34432100  |
| C | -1.05476800 | 1.89493600  | 2.79451700  |
| C | 1.30716200  | 0.72894100  | 3.70915400  |
| H | 1.78090800  | 0.39692800  | 1.63929400  |
| C | -0.80789800 | 1.79547900  | 4.16022300  |
| H | -1.98732500 | 2.33375400  | 2.44207500  |
| C | 0.37042900  | 1.21306800  | 4.61834500  |
| H | 2.23270800  | 0.27035200  | 4.05468400  |
| H | -1.54296700 | 2.17236000  | 4.86978100  |
| H | 0.55632700  | 1.13222400  | 5.68812300  |
| C | 5.68808000  | 1.85106500  | 1.10152100  |
| H | 5.35878000  | 2.51426900  | 1.91424500  |
| H | 6.73513300  | 1.59006400  | 1.31103400  |
| H | 5.67365200  | 2.43157100  | 0.16981000  |
| O | 1.90005300  | -3.64201600 | 1.93721000  |
| B | 1.97650100  | -2.81131900 | 0.77209400  |
| O | 0.62725300  | -2.13874500 | 0.52705600  |
| O | 2.16479300  | -3.75135900 | -0.39524500 |
| H | 2.88302100  | -4.35714900 | -0.16861200 |
| H | 1.75424000  | -3.10158900 | 2.72092900  |
| C | -1.49665000 | -1.73370000 | -3.07131900 |
| C | -1.33668500 | -0.27322100 | -3.21653500 |
| C | 0.05665400  | 0.23546900  | -3.07064200 |
| C | 1.15372600  | -0.64617900 | -3.16208600 |
| C | 0.93715800  | -2.00117200 | -2.86731700 |
| C | -0.42585400 | -2.53640100 | -2.88193800 |
| H | -2.51078700 | -2.12380300 | -3.12995300 |
| H | 0.19296300  | 1.30118700  | -3.25299800 |
| H | 2.17487600  | -0.28769100 | -3.27933300 |
| H | -0.53405200 | -3.60989200 | -2.73182900 |
| O | -2.27893400 | 0.48172200  | -3.41112200 |
| O | 1.98541100  | -2.81781100 | -2.81052100 |
| H | 2.03805600  | -3.30257500 | -1.92440300 |
| B | -0.51003000 | -2.92537800 | 0.43497300  |
| O | -0.48347300 | -4.18249900 | -0.08405100 |
| H | 0.45198800  | -4.41684000 | -0.25522700 |
| C | -1.89452900 | -2.36047200 | 0.90318500  |
| C | -3.09334100 | -2.82223100 | 0.34556300  |
| C | -1.98498800 | -1.41438500 | 1.93245200  |
| C | -4.32482800 | -2.33816100 | 0.77477600  |
| H | -3.05384500 | -3.58703100 | -0.43125300 |
| C | -3.21365700 | -0.94068600 | 2.37521700  |
| H | -1.06901600 | -1.05663800 | 2.40557800  |
| C | -4.40387200 | -1.38647700 | 1.79442600  |

|   |             |             |            |
|---|-------------|-------------|------------|
| H | -5.24633300 | -2.70957200 | 0.32246300 |
| H | -3.25292900 | -0.20490700 | 3.18196100 |
| C | -5.72357000 | -0.83379100 | 2.24151000 |
| H | -6.56178900 | -1.44348400 | 1.88191700 |
| H | -5.79001700 | -0.77933200 | 3.33611500 |
| H | -5.87174600 | 0.18860400  | 1.86205800 |

**TS4**

|    |             |             |             |
|----|-------------|-------------|-------------|
| C  | -3.25356700 | -1.37536300 | 2.16379200  |
| C  | -2.13734600 | -1.47679600 | 1.34665200  |
| C  | -2.19911500 | -1.31343300 | -0.05513100 |
| C  | -3.48417600 | -1.04204400 | -0.57169400 |
| C  | -4.61057900 | -0.92655700 | 0.24207700  |
| C  | -4.51233400 | -1.07892300 | 1.62485700  |
| H  | -3.15359100 | -1.52247500 | 3.24146800  |
| H  | -1.18422500 | -1.73712300 | 1.80833200  |
| H  | -3.62214000 | -0.95837300 | -1.65123800 |
| H  | -5.58673400 | -0.72356900 | -0.20331600 |
| Pd | -0.72981000 | -0.02236700 | -1.08259900 |
| P  | 0.37652200  | 1.00691800  | 0.76001300  |
| C  | -0.52149500 | 2.57136200  | 1.06698100  |
| C  | 0.11724000  | 3.71366300  | 1.55552600  |
| C  | -1.90575200 | 2.58876600  | 0.86657000  |
| C  | -0.61852200 | 4.86231600  | 1.82725400  |
| H  | 1.19466000  | 3.70538800  | 1.71865000  |
| C  | -2.63902800 | 3.73641300  | 1.14749300  |
| H  | -2.40736100 | 1.69190300  | 0.49444600  |
| C  | -1.99474400 | 4.87547000  | 1.62248900  |
| H  | -0.11291700 | 5.75219700  | 2.19845400  |
| H  | -3.71622900 | 3.74179000  | 0.98960500  |
| H  | -2.56736000 | 5.77709600  | 1.83429900  |
| C  | 2.12404000  | 1.52814500  | 0.52121800  |
| C  | 3.16921300  | 1.09843300  | 1.34293200  |
| C  | 2.40806400  | 2.41360900  | -0.52808300 |
| C  | 4.47093400  | 1.53648000  | 1.11595400  |
| H  | 2.98150000  | 0.41923300  | 2.17080100  |
| C  | 3.70821600  | 2.85259500  | -0.74527700 |
| H  | 1.61353000  | 2.79424200  | -1.17108300 |
| C  | 4.74545400  | 2.41438100  | 0.07432600  |
| H  | 5.27294000  | 1.18472200  | 1.76412200  |
| H  | 3.90482400  | 3.55064700  | -1.55741900 |
| H  | 5.76355700  | 2.76469900  | -0.09333400 |
| C  | 0.37737100  | 0.19395300  | 2.40067300  |
| C  | 1.06118700  | -1.01875700 | 2.54658600  |

|   |             |             |             |
|---|-------------|-------------|-------------|
| C | -0.37216700 | 0.68262000  | 3.47299900  |
| C | 1.00207200  | -1.72915600 | 3.73840800  |
| H | 1.63454600  | -1.42720700 | 1.71435700  |
| C | -0.42963400 | -0.03059600 | 4.66758200  |
| H | -0.92268600 | 1.61779300  | 3.37897700  |
| C | 0.25095800  | -1.23650800 | 4.80288100  |
| H | 1.52720600  | -2.67971800 | 3.81698600  |
| H | -1.01684400 | 0.36013500  | 5.49736700  |
| H | 0.19410600  | -1.79370100 | 5.73664500  |
| C | -5.70964900 | -0.93633700 | 2.51420100  |
| H | -6.64202900 | -0.91072300 | 1.93716200  |
| H | -5.77831600 | -1.76300600 | 3.23398100  |
| H | -5.66021200 | -0.00903500 | 3.10274600  |
| O | -1.91338500 | -3.02208700 | -2.30354700 |
| B | -1.28916500 | -2.97914000 | -1.01898600 |
| O | 0.09032800  | -2.77706600 | -1.09322500 |
| O | -1.73390400 | -3.98664600 | -0.11261700 |
| H | -2.55955800 | -3.74671200 | 0.32307700  |
| H | -2.67526800 | -3.61145400 | -2.23644100 |
| C | -1.88151400 | 2.42901300  | -3.08533100 |
| C | -0.43541300 | 2.39097800  | -2.79384300 |
| C | 0.19623500  | 1.05870300  | -2.78752300 |
| C | -0.50931900 | -0.06941900 | -3.28949300 |
| C | -1.90045800 | 0.01783700  | -3.42944100 |
| C | -2.56673800 | 1.30695600  | -3.36954100 |
| H | -2.35061100 | 3.41053300  | -3.06146100 |
| H | 1.28634600  | 1.04803700  | -2.76650600 |
| H | -0.00298700 | -1.00649400 | -3.52348600 |
| H | -3.63618300 | 1.30799600  | -3.57700800 |
| O | 0.18005900  | 3.43218800  | -2.57263500 |
| O | -2.67854700 | -1.00188200 | -3.77039700 |
| H | -2.28036800 | -1.84661700 | -3.41586000 |
| B | 1.04458000  | -3.10911800 | -0.17028500 |
| O | 0.78585800  | -3.89168600 | 0.91546400  |
| H | -0.14627900 | -4.18096200 | 0.87292900  |
| C | 2.48624300  | -2.52586600 | -0.34661500 |
| C | 3.54529700  | -2.92195400 | 0.47932200  |
| C | 2.75290900  | -1.54473700 | -1.31140800 |
| C | 4.81426700  | -2.37032200 | 0.33951400  |
| H | 3.36226400  | -3.67409500 | 1.24845800  |
| C | 4.01643300  | -0.98950300 | -1.45320000 |
| H | 1.93367600  | -1.21111600 | -1.95015100 |
| C | 5.07076600  | -1.40167400 | -0.63282000 |
| H | 5.62671900  | -2.69471600 | 0.99211400  |

|   |            |             |             |
|---|------------|-------------|-------------|
| H | 4.19452500 | -0.21239900 | -2.19967900 |
| C | 6.43705700 | -0.80659900 | -0.79640500 |
| H | 6.92010400 | -1.15378900 | -1.72072300 |
| H | 6.38397800 | 0.29018200  | -0.85270200 |
| H | 7.09606700 | -1.07236000 | 0.03988000  |

**IM6**

|    |             |             |             |
|----|-------------|-------------|-------------|
| C  | -3.98084300 | -0.52901100 | 1.48816700  |
| C  | -2.67007700 | -0.40199500 | 1.01478500  |
| C  | -2.38213500 | 0.23020100  | -0.19809800 |
| C  | -3.47929300 | 0.74499700  | -0.91029500 |
| C  | -4.78473700 | 0.61615000  | -0.44373400 |
| C  | -5.06359900 | -0.02207900 | 0.76875100  |
| H  | -4.15543000 | -1.00432600 | 2.45950500  |
| H  | -1.86807300 | -0.82591300 | 1.62265800  |
| H  | -3.32456200 | 1.24588800  | -1.86746900 |
| H  | -5.60916700 | 1.02534800  | -1.03198700 |
| Pd | -0.52472100 | 0.19351200  | -1.11147400 |
| P  | 0.59665300  | 1.30270100  | 0.60621700  |
| C  | 0.42028600  | 3.11066700  | 0.39721600  |
| C  | 1.24224400  | 4.00230900  | 1.09485900  |
| C  | -0.56192800 | 3.60878900  | -0.46196600 |
| C  | 1.07798900  | 5.37253600  | 0.93708900  |
| H  | 2.01756200  | 3.61827200  | 1.75910100  |
| C  | -0.72439800 | 4.98232000  | -0.61758400 |
| H  | -1.19642900 | 2.90954200  | -1.01030400 |
| C  | 0.09474000  | 5.86297200  | 0.08040100  |
| H  | 1.72283000  | 6.06140000  | 1.48019500  |
| H  | -1.48908400 | 5.36388900  | -1.29199200 |
| H  | -0.02836500 | 6.93744100  | -0.04630100 |
| C  | 2.40969400  | 1.05954900  | 0.73933300  |
| C  | 3.07504800  | 0.91969400  | 1.96141400  |
| C  | 3.15249400  | 1.08924300  | -0.44566400 |
| C  | 4.46131100  | 0.79730900  | 1.99433900  |
| H  | 2.51241400  | 0.90450300  | 2.89393700  |
| C  | 4.53705000  | 0.97657300  | -0.40508100 |
| H  | 2.67037800  | 1.22680600  | -1.41508900 |
| C  | 5.19438100  | 0.82571500  | 0.81283600  |
| H  | 4.96778600  | 0.68539000  | 2.95229000  |
| H  | 5.09783800  | 1.01016400  | -1.33823400 |
| H  | 6.27971200  | 0.73332100  | 0.84105800  |
| C  | -0.02498400 | 0.95798200  | 2.28606200  |
| C  | 0.21745300  | -0.30790000 | 2.83183500  |
| C  | -0.85330500 | 1.84886100  | 2.97002900  |

|   |             |             |             |
|---|-------------|-------------|-------------|
| C | -0.34729000 | -0.67308000 | 4.04733700  |
| H | 0.83888400  | -1.02565000 | 2.29322300  |
| C | -1.42356000 | 1.47884000  | 4.18493300  |
| H | -1.06544700 | 2.83086000  | 2.54791000  |
| C | -1.17320400 | 0.22112700  | 4.72504900  |
| H | -0.15441600 | -1.66787100 | 4.44680500  |
| H | -2.07177900 | 2.17869900  | 4.70982200  |
| H | -1.62479300 | -0.06406100 | 5.67405300  |
| C | -6.46696000 | -0.10941100 | 1.29189000  |
| H | -7.18960600 | -0.30893100 | 0.48943600  |
| H | -6.57264700 | -0.89967300 | 2.04644000  |
| H | -6.77526500 | 0.83225000  | 1.76839400  |
| O | -2.93516700 | -2.88254300 | -1.27758200 |
| B | -2.25174200 | -3.24809800 | -0.13957500 |
| O | -0.91423400 | -3.46393700 | -0.24287800 |
| O | -2.88644300 | -3.44623700 | 1.06804500  |
| H | -3.69110500 | -2.91872000 | 1.17546300  |
| H | -3.84501300 | -2.60857100 | -1.10136000 |
| C | -0.06749900 | 1.40089600  | -3.98876600 |
| C | 1.16064300  | 0.82338900  | -3.41926900 |
| C | 0.98711400  | -0.45607300 | -2.73022400 |
| C | -0.21561800 | -1.19294500 | -2.83488200 |
| C | -1.37496300 | -0.53557400 | -3.27843900 |
| C | -1.25830600 | 0.76265200  | -3.90561400 |
| H | 0.03430400  | 2.36443800  | -4.48512800 |
| H | 1.88939900  | -0.94962300 | -2.37163600 |
| H | -0.28469700 | -2.22154000 | -2.47641300 |
| H | -2.17360500 | 1.18572700  | -4.32036000 |
| O | 2.24604300  | 1.40780900  | -3.50254900 |
| O | -2.57743400 | -1.12642100 | -3.39013300 |
| H | -2.60229300 | -1.89797300 | -2.78621900 |
| B | 0.00696300  | -3.38278100 | 0.79833200  |
| O | -0.37566600 | -3.43375000 | 2.10159700  |
| H | -1.34199300 | -3.51543600 | 2.17869100  |
| C | 1.51276100  | -3.16227800 | 0.47603700  |
| C | 2.42706900  | -2.92607100 | 1.51236500  |
| C | 2.01041800  | -3.14560200 | -0.83344800 |
| C | 3.76666400  | -2.66308500 | 1.25335600  |
| H | 2.07399000  | -2.95004900 | 2.54461400  |
| C | 3.34928600  | -2.89241000 | -1.09619900 |
| H | 1.33249500  | -3.34621300 | -1.66391100 |
| C | 4.24971200  | -2.64388700 | -0.05577000 |
| H | 4.45603300  | -2.47327700 | 2.07747700  |
| H | 3.71078800  | -2.88577000 | -2.12645300 |



|   |            |             |             |
|---|------------|-------------|-------------|
| C | 5.69913300 | -2.40477700 | -0.34974300 |
| H | 6.18594800 | -3.32237900 | -0.70993300 |
| H | 5.82950400 | -1.64486600 | -1.13210600 |
| H | 6.24161400 | -2.06968100 | 0.54275800  |

**IM7**

|    |             |             |             |
|----|-------------|-------------|-------------|
| C  | -2.64230400 | -1.09260600 | -0.75490400 |
| C  | -1.35821400 | -0.82363100 | -0.30436400 |
| C  | -0.94301600 | -1.15007600 | 1.00293800  |
| C  | -1.90132100 | -1.75895800 | 1.83824300  |
| C  | -3.19051000 | -2.03023500 | 1.38824000  |
| C  | -3.56715600 | -1.70433200 | 0.08719800  |
| H  | -0.63753900 | -0.35849000 | -0.97751100 |
| O  | -4.82550400 | -1.94051900 | -0.40981800 |
| H  | -2.95041200 | -0.82023900 | -1.76478500 |
| O  | 0.26436700  | -0.89734900 | 1.47542200  |
| H  | -3.91428500 | -2.50108700 | 2.05909800  |
| H  | -1.60769300 | -2.00936500 | 2.85854800  |
| C  | 4.98799800  | 1.13345400  | -2.37519400 |
| C  | 3.81797100  | 0.62669000  | -1.80998000 |
| C  | 3.53114300  | 0.80634900  | -0.45537100 |
| C  | 4.46603700  | 1.50179500  | 0.31898500  |
| C  | 5.63921400  | 1.99568200  | -0.24400800 |
| C  | 5.91830800  | 1.82605800  | -1.60303900 |
| H  | 5.18872900  | 0.96989300  | -3.43601900 |
| H  | 3.13885300  | 0.05451700  | -2.44722500 |
| H  | 4.28098100  | 1.66545100  | 1.38259200  |
| H  | 6.35043700  | 2.53745900  | 0.38395500  |
| B  | -4.46950600 | 0.79728400  | 1.87229600  |
| O  | -3.53552100 | 1.55881100  | 1.22416600  |
| H  | -2.74433900 | 1.68720900  | 1.77025000  |
| O  | -4.30412100 | 0.51292000  | 3.20048400  |
| H  | -5.03054500 | -0.04080500 | 3.50976100  |
| Pd | 1.86761800  | 0.04622400  | 0.41163500  |
| P  | 2.64143500  | -2.17621400 | 0.15304900  |
| C  | 2.86618700  | -3.18329500 | 1.66302000  |
| C  | 3.74901300  | -4.26862700 | 1.66426000  |
| C  | 2.12751100  | -2.88763800 | 2.81479500  |
| C  | 3.89743700  | -5.04673900 | 2.80677700  |
| H  | 4.32556700  | -4.50468000 | 0.77004300  |
| C  | 2.28186400  | -3.67369100 | 3.95268700  |
| H  | 1.41364500  | -2.06248100 | 2.78664000  |
| C  | 3.16600300  | -4.74827000 | 3.95250900  |
| H  | 4.58677100  | -5.88956900 | 2.80070800  |

|   |              |             |             |
|---|--------------|-------------|-------------|
| H | 1.70521300   | -3.44171900 | 4.84689500  |
| H | 3.28436200   | -5.35740500 | 4.84749400  |
| C | 4.19416100   | -2.45218300 | -0.76937400 |
| C | 4.27412600   | -3.20343500 | -1.94230600 |
| C | 5.34926200   | -1.83997600 | -0.26849900 |
| C | 5.48711200   | -3.31915900 | -2.61808400 |
| H | 3.38599200   | -3.69900600 | -2.33255700 |
| C | 6.55699000   | -1.96150100 | -0.93971300 |
| H | 5.29495100   | -1.24219700 | 0.64199700  |
| C | 6.62585500   | -2.69517600 | -2.12251700 |
| H | 5.53814300   | -3.90370100 | -3.53544100 |
| H | 7.44445100   | -1.46720100 | -0.54769400 |
| H | 7.57110100   | -2.78121200 | -2.65629600 |
| C | 1.31381500   | -2.98768800 | -0.79877400 |
| C | 0.44314400   | -3.89978800 | -0.20123300 |
| C | 1.04726700   | -2.53983900 | -2.09959300 |
| C | -0.67011300  | -4.36250900 | -0.89641200 |
| H | 0.61941400   | -4.23035900 | 0.82220000  |
| C | -0.05222600  | -3.01907500 | -2.79748200 |
| H | 1.69859000   | -1.79605700 | -2.56307900 |
| C | -0.91837400  | -3.92714200 | -2.19243900 |
| H | -1.35767800  | -5.05322500 | -0.41155500 |
| H | -0.25008500  | -2.66165000 | -3.80690600 |
| H | -1.79758300  | -4.28113200 | -2.72782400 |
| C | -9.48815100  | -0.90618000 | -0.15561500 |
| C | -8.24523400  | -0.45961900 | 0.27796000  |
| C | -7.29955400  | 0.05098100  | -0.61797500 |
| C | -7.65057600  | 0.09296100  | -1.97288900 |
| C | -8.89041900  | -0.35205600 | -2.41025600 |
| C | -9.83131200  | -0.85590100 | -1.50742500 |
| H | -10.20908500 | -1.30193800 | 0.56218600  |
| H | -7.99742100  | -0.50339100 | 1.33940900  |
| H | -6.92639100  | 0.47679900  | -2.69128800 |
| H | -9.14073900  | -0.31579700 | -3.47211800 |
| C | -11.18068100 | -1.30973600 | -1.97947400 |
| H | -11.88027300 | -0.46563400 | -2.06542000 |
| H | -11.12419000 | -1.78072000 | -2.96938200 |
| H | -11.62912200 | -2.03201300 | -1.28566000 |
| B | -5.89562900  | 0.52856500  | -0.13393900 |
| O | -5.59745400  | 0.38282600  | 1.21625200  |
| H | -5.41496100  | -2.17721300 | 0.32075200  |
| O | -5.04693900  | 1.12514100  | -1.01063300 |
| H | -4.19670800  | 1.32295500  | -0.57949700 |
| P | 0.89706200   | 2.22448900  | 0.31781800  |

|   |             |            |             |
|---|-------------|------------|-------------|
| C | -0.19945200 | 2.72024300 | 1.69541600  |
| C | -0.57617500 | 1.77255500 | 2.65392700  |
| C | -0.68773300 | 4.03035900 | 1.78628400  |
| C | -1.45161000 | 2.13335400 | 3.67913700  |
| H | -0.20160400 | 0.74916400 | 2.56982100  |
| C | -1.55965600 | 4.38189500 | 2.80985500  |
| H | -0.38468300 | 4.77407800 | 1.04806500  |
| C | -1.94678100 | 3.43220900 | 3.75352100  |
| H | -1.77487100 | 1.38204600 | 4.39714800  |
| H | -1.94490400 | 5.39840500 | 2.86786000  |
| H | -2.64210700 | 3.70414600 | 4.54570600  |
| C | 2.04640200  | 3.64322300 | 0.19245200  |
| C | 2.43834200  | 4.18159400 | -1.03378500 |
| C | 2.65072000  | 4.10776800 | 1.36599700  |
| C | 3.41939400  | 5.16687400 | -1.08529400 |
| H | 1.98005100  | 3.82955400 | -1.95711600 |
| C | 3.62480400  | 5.09667100 | 1.31266400  |
| H | 2.35611000  | 3.69006200 | 2.33013400  |
| C | 4.01489300  | 5.62488700 | 0.08471000  |
| H | 3.71711900  | 5.57932700 | -2.04799500 |
| H | 4.08290100  | 5.45423400 | 2.23354800  |
| H | 4.78197700  | 6.39637500 | 0.04079700  |
| C | -0.14772400 | 2.27752200 | -1.18684600 |
| C | 0.41398100  | 1.80758700 | -2.38195500 |
| C | -1.49860000 | 2.63259300 | -1.16550900 |
| C | -0.35869700 | 1.70434100 | -3.53173500 |
| H | 1.46115400  | 1.50264700 | -2.40342300 |
| C | -2.27280800 | 2.51776900 | -2.31768200 |
| H | -1.96953600 | 2.96927700 | -0.24309900 |
| C | -1.70671300 | 2.05215400 | -3.49944500 |
| H | 0.09072200  | 1.33808600 | -4.45368500 |
| H | -3.33045100 | 2.77490900 | -2.28407500 |
| H | -2.31875700 | 1.95483100 | -4.39432100 |
| C | 7.17552100  | 2.38261500 | -2.20370000 |
| H | 7.34270500  | 1.99436400 | -3.21624700 |
| H | 7.14044800  | 3.47950000 | -2.27472100 |
| H | 8.05857800  | 2.13193100 | -1.59984200 |

**TS5**

|   |             |             |             |
|---|-------------|-------------|-------------|
| C | -2.33600500 | -1.28079700 | 1.69141700  |
| C | -1.22453200 | -1.17539400 | 0.86910600  |
| C | -1.28500700 | -0.51185300 | -0.37745900 |
| C | -2.54539100 | -0.00760000 | -0.77020800 |
| C | -3.66080400 | -0.12061700 | 0.05086200  |

|    |             |             |             |
|----|-------------|-------------|-------------|
| C  | -3.55074000 | -0.74014500 | 1.28942300  |
| H  | -0.26774700 | -1.58809500 | 1.19334500  |
| O  | -4.64296800 | -0.79194200 | 2.14886200  |
| H  | -2.26987900 | -1.76757800 | 2.66515900  |
| O  | -0.24117400 | -0.38751900 | -1.17179800 |
| H  | -4.62088500 | 0.29424500  | -0.26705000 |
| H  | -2.62428300 | 0.48565900  | -1.73893900 |
| C  | 5.47335000  | 1.38288800  | 1.30997200  |
| C  | 4.16510000  | 0.93021600  | 1.12830800  |
| C  | 3.63564000  | 0.76727800  | -0.15063500 |
| C  | 4.45683800  | 1.06263400  | -1.24428000 |
| C  | 5.76266300  | 1.50139300  | -1.06001900 |
| C  | 6.29304900  | 1.67232500  | 0.22205000  |
| H  | 5.86557900  | 1.50632200  | 2.32138400  |
| H  | 3.56605900  | 0.69502700  | 2.01100900  |
| H  | 4.07913700  | 0.93007600  | -2.26082600 |
| H  | 6.38914700  | 1.71276700  | -1.92972800 |
| B  | -5.49399000 | -2.12705000 | 2.24491600  |
| O  | -5.06532800 | -3.19325200 | 1.43875200  |
| H  | -4.69749700 | -3.88540000 | 2.00013300  |
| O  | -5.76777600 | -2.45053800 | 3.56826100  |
| H  | -5.78958000 | -1.66224300 | 4.12081200  |
| Pd | 1.74577000  | 0.14193900  | -0.52959900 |
| P  | 0.96305000  | 2.31096400  | 0.06266800  |
| C  | -0.10136700 | 3.17343500  | -1.14552600 |
| C  | -0.42061900 | 4.52584300  | -0.97236600 |
| C  | -0.60199700 | 2.47600300  | -2.24728400 |
| C  | -1.23671900 | 5.17101800  | -1.89267800 |
| H  | -0.02642800 | 5.07334400  | -0.11527200 |
| C  | -1.41646000 | 3.13145700  | -3.16800100 |
| H  | -0.38029100 | 1.41125700  | -2.34511700 |
| C  | -1.73224200 | 4.47412200  | -2.99300300 |
| H  | -1.48396800 | 6.22229200  | -1.75379100 |
| H  | -1.80760700 | 2.58428800  | -4.02452000 |
| H  | -2.36873400 | 4.98316000  | -3.71535500 |
| C  | 2.19032400  | 3.59685000  | 0.49788400  |
| C  | 2.26116900  | 4.20587000  | 1.75131000  |
| C  | 3.10695100  | 3.96549500  | -0.49278300 |
| C  | 3.24791700  | 5.15276500  | 2.01553900  |
| H  | 1.54489700  | 3.94247600  | 2.52853900  |
| C  | 4.08937400  | 4.90867700  | -0.22718600 |
| H  | 3.05817200  | 3.49790500  | -1.47672600 |
| C  | 4.16665700  | 5.49940400  | 1.03224200  |
| H  | 3.29599200  | 5.62011900  | 2.99795800  |

|   |              |             |             |
|---|--------------|-------------|-------------|
| H | 4.80658400   | 5.17249700  | -1.00296900 |
| H | 4.94229000   | 6.23391700  | 1.24318600  |
| C | -0.05653900  | 2.08459700  | 1.56173500  |
| C | -1.43709500  | 2.28708100  | 1.55348600  |
| C | 0.55271000   | 1.57347300  | 2.71630200  |
| C | -2.19610900  | 1.98455100  | 2.68089800  |
| H | -1.93012300  | 2.65435300  | 0.65470000  |
| C | -0.20591200  | 1.28637200  | 3.84378800  |
| H | 1.63202600   | 1.40717200  | 2.73363500  |
| C | -1.58406100  | 1.48872600  | 3.82570700  |
| H | -3.27594900  | 2.12156100  | 2.65360800  |
| H | 0.27950600   | 0.90086400  | 4.73977700  |
| H | -2.18265700  | 1.24625300  | 4.70227000  |
| C | -8.88815000  | 1.74132500  | -0.64663600 |
| C | -8.20693900  | 0.75326000  | 0.05480800  |
| C | -8.05621100  | -0.53678300 | -0.46595400 |
| C | -8.62190000  | -0.79903400 | -1.72215300 |
| C | -9.30409100  | 0.18380600  | -2.42320100 |
| C | -9.44474000  | 1.47215700  | -1.89756100 |
| H | -8.99724700  | 2.73899000  | -0.21856500 |
| H | -7.79455400  | 0.98794300  | 1.03720500  |
| H | -8.51757800  | -1.79718900 | -2.14721600 |
| H | -9.73871800  | -0.04177800 | -3.39862000 |
| C | -10.16559200 | 2.53422000  | -2.67233800 |
| H | -9.57153400  | 2.87276400  | -3.53312900 |
| H | -11.11891800 | 2.16265600  | -3.07123500 |
| H | -10.37869600 | 3.41385400  | -2.05290300 |
| B | -7.27624100  | -1.65098800 | 0.28811200  |
| O | -6.62987800  | -1.32413000 | 1.48871700  |
| H | -5.75456300  | -0.55370100 | 1.59496100  |
| O | -7.21056700  | -2.90489800 | -0.20084700 |
| H | -6.52946000  | -3.40582700 | 0.29121700  |
| P | 2.71116500   | -2.05869100 | -0.59602300 |
| C | 1.91216400   | -3.40821800 | -1.54126200 |
| C | 0.54280700   | -3.31050200 | -1.80397400 |
| C | 2.61388700   | -4.55361700 | -1.94115200 |
| C | -0.11692300  | -4.35732200 | -2.44293700 |
| H | 0.01379500   | -2.39417300 | -1.53718300 |
| C | 1.94839100   | -5.59183900 | -2.58040300 |
| H | 3.68798300   | -4.62822700 | -1.76959400 |
| C | 0.58027900   | -5.49691600 | -2.82649600 |
| H | -1.18329300  | -4.27293900 | -2.64494000 |
| H | 2.50073300   | -6.47802200 | -2.88968300 |
| H | 0.06086500   | -6.31270300 | -3.32744800 |

|   |            |             |             |
|---|------------|-------------|-------------|
| C | 4.45035600 | -2.12584700 | -1.15514500 |
| C | 5.52009200 | -2.07716500 | -0.26058700 |
| C | 4.70710900 | -2.07407800 | -2.53025800 |
| C | 6.82476600 | -1.97665400 | -0.73344800 |
| H | 5.33513700 | -2.10176000 | 0.81269200  |
| C | 6.01159300 | -1.98930100 | -3.00001400 |
| H | 3.87710700 | -2.09908100 | -3.23850600 |
| C | 7.07429600 | -1.93753200 | -2.10088100 |
| H | 7.65024800 | -1.92715100 | -0.02469700 |
| H | 6.19924900 | -1.95857300 | -4.07215900 |
| H | 8.09658500 | -1.86264900 | -2.46828300 |
| C | 2.74209900 | -2.69285200 | 1.12633100  |
| C | 2.21714300 | -1.90100600 | 2.15003700  |
| C | 3.24978600 | -3.95758700 | 1.44154400  |
| C | 2.19579300 | -2.35894900 | 3.46378100  |
| H | 1.80832500 | -0.91883700 | 1.90461900  |
| C | 3.23642400 | -4.41302000 | 2.75411700  |
| H | 3.65765000 | -4.59380200 | 0.65614500  |
| C | 2.70866300 | -3.61493200 | 3.76722900  |
| H | 1.77175400 | -1.73046200 | 4.24600000  |
| H | 3.63484300 | -5.39896300 | 2.98765300  |
| H | 2.69430500 | -3.97793300 | 4.79365100  |
| C | 7.70712300 | 2.13790900  | 0.40532700  |
| H | 7.96678500 | 2.22974700  | 1.46728600  |
| H | 8.42263300 | 1.43917900  | -0.05258100 |
| H | 7.87663000 | 3.11798600  | -0.06302500 |

**B**

|    |             |             |             |
|----|-------------|-------------|-------------|
| C  | -5.03333000 | 0.99158900  | -1.53099700 |
| C  | -3.94651400 | 0.96381900  | -2.40713400 |
| C  | -2.66096300 | 0.67210100  | -1.95581000 |
| C  | -2.41963200 | 0.40749600  | -0.60680200 |
| C  | -3.50951900 | 0.41454700  | 0.27069400  |
| C  | -4.79507300 | 0.69987200  | -0.18660600 |
| H  | -4.11152600 | 1.17727200  | -3.46531600 |
| H  | -1.83978800 | 0.64512100  | -2.67488800 |
| H  | -3.36155000 | 0.18837300  | 1.33004500  |
| H  | -5.63129600 | 0.70093400  | 0.51629800  |
| Pd | -0.58678600 | 0.02854400  | 0.14199200  |
| P  | -1.02504800 | -2.31433100 | 0.11015500  |
| C  | 0.49962700  | -3.31217900 | 0.09573200  |
| C  | 0.77218500  | -4.27793800 | 1.06617900  |
| C  | 1.41816100  | -3.09647500 | -0.93602400 |
| C  | 1.95026800  | -5.01570600 | 1.00284200  |

|   |             |             |             |
|---|-------------|-------------|-------------|
| H | 0.06366500  | -4.45506500 | 1.87435000  |
| C | 2.59172400  | -3.83684500 | -0.99840100 |
| H | 1.21797600  | -2.33360200 | -1.68907200 |
| C | 2.85925900  | -4.79656900 | -0.02713600 |
| H | 2.15733200  | -5.76502100 | 1.76537700  |
| H | 3.31152400  | -3.64301500 | -1.79142700 |
| H | 3.78609100  | -5.36637200 | -0.06708100 |
| C | -1.79979500 | -2.65761400 | 1.72995700  |
| C | -1.20509900 | -2.06986300 | 2.85615400  |
| C | -2.94287800 | -3.44299300 | 1.88083600  |
| C | -1.75843600 | -2.27260300 | 4.11431200  |
| H | -0.29757400 | -1.47330800 | 2.72929500  |
| C | -3.49597300 | -3.63381400 | 3.14487600  |
| H | -3.40581100 | -3.90581800 | 1.00975600  |
| C | -2.90716900 | -3.04857600 | 4.25996300  |
| H | -1.29247000 | -1.81786800 | 4.98720200  |
| H | -4.39034900 | -4.24508000 | 3.25502900  |
| H | -3.34265200 | -3.19735300 | 5.24705800  |
| C | -2.09782500 | -3.14022800 | -1.12807500 |
| C | -1.66094100 | -4.26567300 | -1.83491900 |
| C | -3.38293000 | -2.64114900 | -1.38012500 |
| C | -2.48683400 | -4.87105100 | -2.77759100 |
| H | -0.66950400 | -4.67647700 | -1.65176700 |
| C | -4.20484200 | -3.25097900 | -2.31940600 |
| H | -3.74698300 | -1.77243200 | -0.83481900 |
| C | -3.75806600 | -4.36506600 | -3.02422800 |
| H | -2.13105000 | -5.74580700 | -3.31967500 |
| H | -5.19822700 | -2.84325900 | -2.50183200 |
| H | -4.40143200 | -4.83884500 | -3.76416100 |
| C | 2.73723600  | -0.26430900 | -0.55199500 |
| C | 4.02099500  | -0.45400100 | -1.04798800 |
| C | 4.99480000  | -1.03987000 | -0.24884800 |
| C | 4.66746300  | -1.44671900 | 1.04205000  |
| C | 3.38552200  | -1.25657200 | 1.53645300  |
| C | 2.37846500  | -0.64939100 | 0.75538400  |
| H | 1.97058500  | 0.18565900  | -1.18494200 |
| H | 4.26732700  | -0.14690400 | -2.06417400 |
| H | 5.43655300  | -1.92422200 | 1.64857500  |
| H | 3.12033500  | -1.59249600 | 2.53912400  |
| O | 1.17057000  | -0.48439200 | 1.25544500  |
| O | 6.26632200  | -1.29836100 | -0.72008300 |
| B | 7.11844200  | -0.35642300 | -1.19473200 |
| O | 8.32915300  | -0.83219400 | -1.63461800 |
| H | 8.92269800  | -0.15681500 | -1.97350900 |

|                      |             |            |             |
|----------------------|-------------|------------|-------------|
| O                    | 6.75825600  | 0.96961400 | -1.21490600 |
| H                    | 7.44876800  | 1.55553300 | -1.53764400 |
| C                    | -6.40301500 | 1.37388300 | -2.00888100 |
| H                    | -6.55916800 | 2.46106100 | -1.93784500 |
| H                    | -6.56026900 | 1.09591400 | -3.05909600 |
| H                    | -7.19096200 | 0.89639500 | -1.41196400 |
| P                    | -0.15390700 | 2.38016600 | 0.21999500  |
| C                    | 0.30606300  | 3.03903100 | 1.86106800  |
| C                    | 0.88710100  | 2.18286000 | 2.80222000  |
| C                    | 0.14171100  | 4.39648900 | 2.16059800  |
| C                    | 1.29345800  | 2.69030200 | 4.03428900  |
| H                    | 1.03448000  | 1.12885000 | 2.54923800  |
| C                    | 0.54737500  | 4.89189500 | 3.39379200  |
| H                    | -0.30440000 | 5.06820000 | 1.42685700  |
| C                    | 1.12186700  | 4.03787100 | 4.33222800  |
| H                    | 1.74832000  | 2.02292600 | 4.76456400  |
| H                    | 0.41477800  | 5.94823900 | 3.62273600  |
| H                    | 1.44024600  | 4.42761400 | 5.29817300  |
| C                    | -1.50006200 | 3.49952700 | -0.31901300 |
| C                    | -1.42573700 | 4.31665700 | -1.44786800 |
| C                    | -2.68617200 | 3.47476400 | 0.42392600  |
| C                    | -2.52487000 | 5.07803300 | -1.83790500 |
| H                    | -0.50724200 | 4.36333600 | -2.03074900 |
| C                    | -3.77971500 | 4.23522000 | 0.03482700  |
| H                    | -2.75628700 | 2.84140700 | 1.30868300  |
| C                    | -3.70406400 | 5.03401100 | -1.10409800 |
| H                    | -2.45481800 | 5.70919300 | -2.72251000 |
| H                    | -4.69971400 | 4.19343300 | 0.61639700  |
| H                    | -4.56475300 | 5.62436300 | -1.41500000 |
| C                    | 1.26704800  | 2.78496600 | -0.85610500 |
| C                    | 1.18473500  | 2.47076200 | -2.21897400 |
| C                    | 2.46216000  | 3.28941800 | -0.34293400 |
| C                    | 2.27272400  | 2.68136800 | -3.05553000 |
| H                    | 0.26239700  | 2.04726900 | -2.62179200 |
| C                    | 3.55671000  | 3.48350400 | -1.18059100 |
| H                    | 2.54711300  | 3.51099500 | 0.72005900  |
| C                    | 3.46347400  | 3.18452800 | -2.53436900 |
| H                    | 2.19765400  | 2.43774100 | -4.11410600 |
| H                    | 4.49289500  | 3.85287300 | -0.76605200 |
| H                    | 4.32289000  | 3.33130900 | -3.18648200 |
| <b>C<sub>a</sub></b> |             |            |             |
| C                    | -4.33370200 | 0.85771000 | 2.86084400  |
| C                    | -3.18317700 | 0.22785200 | 3.33388300  |



|    |             |             |             |
|----|-------------|-------------|-------------|
| C  | -2.07433200 | 0.03557500  | 2.50745600  |
| C  | -2.08405200 | 0.47378900  | 1.18062900  |
| C  | -3.23818700 | 1.10395900  | 0.70392800  |
| C  | -4.34062600 | 1.29218800  | 1.53198600  |
| H  | -3.14985100 | -0.11430200 | 4.37018300  |
| H  | -1.18278000 | -0.44148100 | 2.92356000  |
| H  | -3.27883300 | 1.46916100  | -0.32460000 |
| H  | -5.23003800 | 1.79092700  | 1.14089800  |
| Pd | -0.44791300 | 0.15714600  | 0.03107300  |
| P  | 0.08378300  | 2.44787300  | -0.19213800 |
| C  | -2.48831000 | -1.56682400 | -1.62018900 |
| C  | -1.59502400 | -1.62058900 | -0.64867300 |
| C  | -0.77937200 | -2.19258300 | 0.26798100  |
| C  | -3.26204300 | -2.82040000 | -1.93124900 |
| O  | -3.51413600 | -3.09340200 | -3.09213200 |
| C  | 1.86723100  | 2.80616000  | -0.33322600 |
| C  | 2.46152600  | 3.33795000  | -1.47876500 |
| C  | 2.66069000  | 2.51512200  | 0.78003400  |
| C  | 3.83427800  | 3.56058400  | -1.51045900 |
| H  | 1.85632600  | 3.57527000  | -2.35284700 |
| C  | 4.03020500  | 2.74479500  | 0.74740300  |
| H  | 2.20569800  | 2.08924300  | 1.67542800  |
| C  | 4.61975500  | 3.25865300  | -0.40272500 |
| H  | 4.29164900  | 3.96797500  | -2.41074500 |
| H  | 4.64115700  | 2.48857300  | 1.61089200  |
| H  | 5.69572600  | 3.42011800  | -0.43679900 |
| C  | -0.65943100 | 2.78639900  | -1.82565500 |
| C  | -0.15068600 | 2.11639200  | -2.94929800 |
| C  | -1.80489200 | 3.57731400  | -1.95621300 |
| C  | -0.75747400 | 2.28293700  | -4.18854600 |
| H  | 0.69156100  | 1.43257900  | -2.82605400 |
| C  | -2.41987400 | 3.71790000  | -3.19731500 |
| H  | -2.22259500 | 4.08353500  | -1.08609200 |
| C  | -1.89138300 | 3.08219300  | -4.31583600 |
| H  | -0.35264400 | 1.76677600  | -5.05749400 |
| H  | -3.31328600 | 4.33350200  | -3.28808600 |
| H  | -2.36887700 | 3.20099800  | -5.28715100 |
| C  | -0.50037200 | 3.79766000  | 0.89860200  |
| C  | -0.21672500 | 5.12395300  | 0.54472400  |
| C  | -1.16263400 | 3.53584900  | 2.09837100  |
| C  | -0.61142200 | 6.16875200  | 1.36843900  |
| H  | 0.31916800  | 5.33645900  | -0.38148300 |
| C  | -1.55379500 | 4.58713300  | 2.92449200  |
| H  | -1.37787400 | 2.50871900  | 2.38631100  |

|   |             |             |             |
|---|-------------|-------------|-------------|
| C | -1.28348600 | 5.90023000  | 2.55996900  |
| H | -0.38874500 | 7.19612900  | 1.08522600  |
| H | -2.07356400 | 4.37119400  | 3.85646800  |
| H | -1.59085700 | 6.72082000  | 3.20643000  |
| C | -3.72648000 | -3.68739400 | -0.81441600 |
| C | -3.95918700 | -3.19589900 | 0.47494900  |
| C | -4.01581200 | -5.02423300 | -1.10487200 |
| C | -4.45455600 | -4.03960900 | 1.46210200  |
| H | -3.77440700 | -2.14533300 | 0.70032100  |
| C | -4.49308700 | -5.86860900 | -0.11352800 |
| H | -3.85495600 | -5.37850800 | -2.12136600 |
| C | -4.71204100 | -5.37641000 | 1.17196100  |
| H | -4.64264300 | -3.64751300 | 2.46037700  |
| H | -4.70234500 | -6.91254300 | -0.34100100 |
| H | -5.09316100 | -6.03805800 | 1.94855700  |
| C | 2.61603700  | -0.61627400 | 0.69141600  |
| C | 3.86453800  | -0.94779800 | 1.20415800  |
| C | 4.95849100  | -1.05451800 | 0.35625000  |
| C | 4.80081500  | -0.80172800 | -1.00362500 |
| C | 3.55497200  | -0.47221500 | -1.51433500 |
| C | 2.41510900  | -0.38522200 | -0.68616100 |
| H | 1.75263400  | -0.55169900 | 1.36153500  |
| H | 3.99274300  | -1.14385700 | 2.26918800  |
| H | 5.67277200  | -0.86933000 | -1.65342700 |
| H | 3.42254500  | -0.27969200 | -2.57926200 |
| O | 1.24384200  | -0.10143700 | -1.22059500 |
| O | 6.21786500  | -1.35313900 | 0.83782300  |
| B | 6.54167700  | -2.51900800 | 1.44920000  |
| O | 7.84084300  | -2.61318800 | 1.88110800  |
| H | 8.06075800  | -3.44362400 | 2.31181900  |
| O | 5.60565800  | -3.51664300 | 1.60392500  |
| H | 5.95235500  | -4.30692400 | 2.02869000  |
| C | -2.74276900 | -0.40243000 | -2.52520000 |
| H | -3.73093700 | 0.04057100  | -2.33182400 |
| H | -1.98030700 | 0.37481000  | -2.40857400 |
| H | -2.74448400 | -0.75348500 | -3.56428900 |
| C | -5.53433700 | 1.05568800  | 3.73873800  |
| H | -5.31201500 | 0.81193900  | 4.78504800  |
| H | -5.89290300 | 2.09345500  | 3.70598400  |
| H | -6.37455700 | 0.42012300  | 3.42479300  |
| C | 0.42501400  | -2.96495600 | -0.03360100 |
| C | 1.17980500  | -3.47337900 | 1.02914700  |
| C | 0.86927900  | -3.16227000 | -1.34621300 |
| C | 2.37413900  | -4.13775700 | 0.79192600  |

|   |             |             |             |
|---|-------------|-------------|-------------|
| H | 0.83767100  | -3.30282500 | 2.05159000  |
| C | 2.06194100  | -3.82824400 | -1.58071500 |
| H | 0.29869700  | -2.74410400 | -2.17361100 |
| C | 2.82277400  | -4.30431700 | -0.51441700 |
| H | 2.98977900  | -4.47288100 | 1.62453800  |
| H | 2.41785600  | -3.95301100 | -2.60180000 |
| H | 3.78004200  | -4.78833300 | -0.70009000 |
| H | -1.08419200 | -2.15315800 | 1.31949400  |

**TS6<sub>a</sub>**

|    |             |             |             |
|----|-------------|-------------|-------------|
| C  | -0.75156100 | -4.81158600 | -2.13269900 |
| C  | -0.40395400 | -3.73322500 | -2.94809900 |
| C  | -0.16901900 | -2.46855000 | -2.41237100 |
| C  | -0.28947300 | -2.23722700 | -1.04019000 |
| C  | -0.63175900 | -3.31629200 | -0.21935200 |
| C  | -0.85472300 | -4.58288100 | -0.75801300 |
| H  | -0.30079800 | -3.89069200 | -4.02379000 |
| H  | 0.12350600  | -1.65465300 | -3.07946100 |
| H  | -0.69875700 | -3.17715000 | 0.86291700  |
| H  | -1.10884400 | -5.41502800 | -0.09746500 |
| Pd | 0.06645300  | -0.43919000 | -0.21234800 |
| P  | 2.39420100  | -0.85798400 | -0.11554800 |
| C  | -3.18169600 | -0.49208800 | -0.63881100 |
| C  | -2.03033200 | -0.16985800 | -0.01480000 |
| C  | -1.98307000 | 0.59739200  | 1.15112100  |
| C  | -4.34930900 | 0.04766300  | 0.10513100  |
| O  | -4.16265700 | 0.75775000  | 1.10214300  |
| C  | 3.36614100  | 0.68067200  | -0.21616500 |
| C  | 4.37149800  | 0.98607400  | 0.70315200  |
| C  | 3.08651400  | 1.57455200  | -1.25441500 |
| C  | 5.08815400  | 2.17271300  | 0.58128700  |
| H  | 4.59314000  | 0.29799500  | 1.51869200  |
| C  | 3.80591400  | 2.75710900  | -1.37504100 |
| H  | 2.28292000  | 1.35229500  | -1.95802800 |
| C  | 4.80596800  | 3.05733000  | -0.45487600 |
| H  | 5.86803200  | 2.40786300  | 1.30405900  |
| H  | 3.56180800  | 3.46029500  | -2.16906400 |
| H  | 5.35839500  | 3.99177600  | -0.53918200 |
| C  | 2.71005100  | -1.51211000 | 1.56552800  |
| C  | 2.02659200  | -0.91330200 | 2.63313900  |
| C  | 3.60073700  | -2.55817000 | 1.81487100  |
| C  | 2.23537400  | -1.36843100 | 3.92960800  |
| H  | 1.35274200  | -0.07554400 | 2.43609300  |
| C  | 3.79869900  | -3.01196100 | 3.11639100  |

|   |             |             |             |
|---|-------------|-------------|-------------|
| H | 4.14034000  | -3.02343600 | 0.99061800  |
| C | 3.11570600  | -2.41999200 | 4.17322800  |
| H | 1.70044600  | -0.89718000 | 4.75366200  |
| H | 4.49283800  | -3.83015300 | 3.30244000  |
| H | 3.27106300  | -2.77810600 | 5.19008300  |
| C | 3.26298600  | -2.01635800 | -1.23441500 |
| C | 4.38868300  | -1.62462500 | -1.96482100 |
| C | 2.78576900  | -3.32682600 | -1.36891500 |
| C | 5.02270000  | -2.52541900 | -2.81592000 |
| H | 4.77635000  | -0.61143100 | -1.86755900 |
| C | 3.42307800  | -4.22275500 | -2.21761200 |
| H | 1.90866200  | -3.64837100 | -0.80714200 |
| C | 4.54129800  | -3.82336700 | -2.94506600 |
| H | 5.89925500  | -2.20837800 | -3.37877800 |
| H | 3.03221700  | -5.23461700 | -2.31689300 |
| H | 5.03658600  | -4.52527100 | -3.61434800 |
| C | -5.75259900 | -0.20201600 | -0.31334000 |
| C | -6.17273000 | -1.42294400 | -0.84880300 |
| C | -6.69599200 | 0.80519300  | -0.08086600 |
| C | -7.51368900 | -1.62891100 | -1.15189700 |
| H | -5.45560100 | -2.22672600 | -1.00135300 |
| C | -8.02868300 | 0.60760400  | -0.41089900 |
| H | -6.36077100 | 1.74156900  | 0.36030900  |
| C | -8.43990700 | -0.61146300 | -0.94504400 |
| H | -7.83622600 | -2.58818300 | -1.55263500 |
| H | -8.75368500 | 1.40200700  | -0.24297800 |
| H | -9.48751800 | -0.77099200 | -1.19533300 |
| C | 0.03092300  | 2.88161900  | -0.81939400 |
| C | 0.13409500  | 4.16913400  | -1.33626700 |
| C | 0.81853000  | 5.15124500  | -0.63086300 |
| C | 1.40513100  | 4.83594200  | 0.59305000  |
| C | 1.30349000  | 3.55415000  | 1.10986900  |
| C | 0.61844100  | 2.53284000  | 0.41585500  |
| H | -0.49189900 | 2.10475100  | -1.38357900 |
| H | -0.32272500 | 4.41746600  | -2.29356100 |
| H | 1.95286600  | 5.61408700  | 1.12377200  |
| H | 1.78602300  | 3.28882900  | 2.05117700  |
| O | 0.55586500  | 1.32570100  | 0.93562900  |
| O | 0.99900600  | 6.42256200  | -1.13368500 |
| B | -0.00726000 | 7.23929000  | -1.53836700 |
| O | 0.38915600  | 8.46036800  | -2.02293000 |
| H | -0.33317700 | 9.02415300  | -2.31253100 |
| O | -1.31288600 | 6.82694600  | -1.44663200 |
| H | -1.95878100 | 7.48102900  | -1.72792100 |

|   |             |             |             |
|---|-------------|-------------|-------------|
| C | -3.28999900 | -1.19276200 | -1.95842700 |
| H | -4.15087300 | -0.83572100 | -2.53734700 |
| H | -2.38306300 | -1.01738700 | -2.54482900 |
| H | -3.38556300 | -2.28413000 | -1.85417800 |
| C | -1.01748100 | -6.17107300 | -2.71104900 |
| H | -2.09325200 | -6.34970300 | -2.85450600 |
| H | -0.53818900 | -6.29301100 | -3.69090200 |
| H | -0.64740600 | -6.96953500 | -2.05418000 |
| C | -1.76359000 | 0.09591100  | 2.49739600  |
| C | -1.29268200 | 0.97301600  | 3.48014300  |
| C | -2.00890300 | -1.24544100 | 2.81982000  |
| C | -1.07284100 | 0.51500200  | 4.77272000  |
| H | -1.07591000 | 2.00561900  | 3.20807900  |
| C | -1.79032300 | -1.69869600 | 4.11089500  |
| H | -2.37126600 | -1.92088900 | 2.04396800  |
| C | -1.32306100 | -0.81855400 | 5.08757000  |
| H | -0.70347200 | 1.19817500  | 5.53536000  |
| H | -1.98313700 | -2.73993100 | 4.36208100  |
| H | -1.15136000 | -1.17819200 | 6.10122100  |
| H | -1.86091900 | 1.67627900  | 1.01578900  |

**D<sub>a</sub>**

|    |             |             |             |
|----|-------------|-------------|-------------|
| C  | 1.10523000  | -4.65507300 | -2.48891000 |
| C  | 1.14753000  | -3.43690100 | -3.16819500 |
| C  | 0.89821100  | -2.23503700 | -2.50896500 |
| C  | 0.58099200  | -2.20669000 | -1.14733300 |
| C  | 0.52996200  | -3.43011400 | -0.46821000 |
| C  | 0.79770600  | -4.62983800 | -1.12613600 |
| H  | 1.40294300  | -3.42789800 | -4.23002000 |
| H  | 0.97230300  | -1.29955300 | -3.06939500 |
| H  | 0.29887900  | -3.45062000 | 0.59952900  |
| H  | 0.77040900  | -5.56999700 | -0.56980800 |
| Pd | 0.26107300  | -0.45359200 | -0.19822200 |
| P  | 2.58784200  | 0.09730700  | -0.05896500 |
| C  | -2.68803700 | -1.54754200 | -0.72690700 |
| C  | -1.69814400 | -0.89675400 | 0.00273400  |
| C  | -2.33724000 | -0.38850000 | 1.23773300  |
| C  | -3.87358700 | -1.48241500 | 0.03267900  |
| O  | -3.73741500 | -0.83142300 | 1.16687000  |
| C  | 2.86723900  | 1.89791500  | -0.14588700 |
| C  | 3.58646400  | 2.59272300  | 0.82764600  |
| C  | 2.29528400  | 2.60163500  | -1.21060500 |
| C  | 3.73745900  | 3.97296700  | 0.73077200  |
| H  | 4.02575200  | 2.05540300  | 1.66796400  |

|   |             |             |             |
|---|-------------|-------------|-------------|
| C | 2.45077600  | 3.97885100  | -1.30704800 |
| H | 1.70862300  | 2.06513700  | -1.95849800 |
| C | 3.17156300  | 4.66574800  | -0.33430900 |
| H | 4.29548000  | 4.50916900  | 1.49703000  |
| H | 1.98188100  | 4.51988500  | -2.12689000 |
| H | 3.27925400  | 5.74716200  | -0.40119800 |
| C | 3.17218300  | -0.38317600 | 1.60805700  |
| C | 2.27934000  | -0.24733200 | 2.67876100  |
| C | 4.46831200  | -0.84908000 | 1.84369900  |
| C | 2.68614500  | -0.58269000 | 3.96523900  |
| H | 1.27851600  | 0.15225500  | 2.49901000  |
| C | 4.86674000  | -1.18516200 | 3.13391200  |
| H | 5.16872500  | -0.95187700 | 1.01495700  |
| C | 3.97566100  | -1.05541400 | 4.19428700  |
| H | 1.98321600  | -0.47725600 | 4.79094100  |
| H | 5.87762800  | -1.55051500 | 3.30922600  |
| H | 4.28770200  | -1.32198000 | 5.20326200  |
| C | 3.83312100  | -0.62654300 | -1.18594100 |
| C | 4.72096100  | 0.15517500  | -1.92905400 |
| C | 3.87697300  | -2.02066800 | -1.31493600 |
| C | 5.63533800  | -0.44698000 | -2.78951700 |
| H | 4.69855400  | 1.24043700  | -1.83458900 |
| C | 4.79336100  | -2.61751700 | -2.17076000 |
| H | 3.18242700  | -2.64109900 | -0.74667900 |
| C | 5.67218200  | -1.83163400 | -2.91254000 |
| H | 6.32159000  | 0.17233000  | -3.36523200 |
| H | 4.80797900  | -3.70228700 | -2.26792100 |
| H | 6.38531200  | -2.29979700 | -3.58959100 |
| C | -5.20889400 | -1.99460800 | -0.24239400 |
| C | -5.40772100 | -3.09137600 | -1.09225200 |
| C | -6.31320000 | -1.40243700 | 0.38812800  |
| C | -6.68929600 | -3.57759800 | -1.31186400 |
| H | -4.55627900 | -3.58508900 | -1.55446000 |
| C | -7.59146700 | -1.88296900 | 0.15143100  |
| H | -6.15211200 | -0.56080700 | 1.05746100  |
| C | -7.78135600 | -2.97048400 | -0.69863600 |
| H | -6.83576300 | -4.43674700 | -1.96313100 |
| H | -8.44452900 | -1.41141000 | 0.63515500  |
| H | -8.78534200 | -3.35112600 | -0.87809600 |
| C | -1.03508500 | 2.54450700  | -0.85968500 |
| C | -1.46426100 | 3.76153600  | -1.37916900 |
| C | -1.30996300 | 4.92920100  | -0.64290200 |
| C | -0.71521300 | 4.87330800  | 0.61528600  |
| C | -0.28812700 | 3.66201000  | 1.13575000  |

|   |             |             |             |
|---|-------------|-------------|-------------|
| C | -0.43193200 | 2.45400800  | 0.41543500  |
| H | -1.13452700 | 1.62977400  | -1.45058500 |
| H | -1.91968300 | 3.81039000  | -2.36811300 |
| H | -0.58560100 | 5.80060400  | 1.17276500  |
| H | 0.19388500  | 3.61298700  | 2.11262500  |
| O | -0.01862100 | 1.32672300  | 0.95035900  |
| O | -1.66794700 | 6.16146300  | -1.15130100 |
| B | -2.93085300 | 6.49670500  | -1.51691100 |
| O | -3.07814900 | 7.76504400  | -2.02101700 |
| H | -3.97767700 | 7.98944800  | -2.27393000 |
| O | -3.95799200 | 5.59727200  | -1.37087900 |
| H | -4.81763400 | 5.93265100  | -1.64056500 |
| C | -2.53662400 | -2.12678700 | -2.09585300 |
| H | -3.45404100 | -2.01967100 | -2.68842000 |
| H | -1.72580500 | -1.61024900 | -2.61907900 |
| H | -2.25814700 | -3.19090700 | -2.07199800 |
| C | 1.37211700  | -5.95246300 | -3.19559300 |
| H | 0.44261700  | -6.49740800 | -3.41698000 |
| H | 1.88672900  | -5.79031400 | -4.15131300 |
| H | 1.99579000  | -6.62273300 | -2.58858400 |
| C | -1.76120400 | -0.82553900 | 2.55550700  |
| C | -1.39386500 | 0.12130900  | 3.50823700  |
| C | -1.59496900 | -2.18377700 | 2.82592200  |
| C | -0.87556400 | -0.29079600 | 4.73214400  |
| H | -1.48903600 | 1.18066600  | 3.27345800  |
| C | -1.06824900 | -2.59393000 | 4.04418200  |
| H | -1.88151600 | -2.92140200 | 2.07438900  |
| C | -0.71164000 | -1.64638600 | 5.00088400  |
| H | -0.59412000 | 0.45290300  | 5.47657300  |
| H | -0.93571800 | -3.65491400 | 4.24873200  |
| H | -0.30129200 | -1.96784300 | 5.95732600  |
| H | -2.36039000 | 0.71164200  | 1.18072000  |

**TS7<sub>a</sub>**

|   |             |             |             |
|---|-------------|-------------|-------------|
| C | -3.46287200 | -3.26276000 | -2.08919300 |
| C | -2.70526900 | -2.34384500 | -2.82586600 |
| C | -1.96968600 | -1.35208500 | -2.19517900 |
| C | -1.92791500 | -1.25616100 | -0.78986200 |
| C | -2.68386400 | -2.18373900 | -0.05793800 |
| C | -3.43973800 | -3.16300700 | -0.69931400 |
| H | -2.68772700 | -2.42081700 | -3.91475500 |
| H | -1.37671300 | -0.66933700 | -2.80320600 |
| H | -2.66245600 | -2.16764300 | 1.02979100  |
| H | -4.01541600 | -3.87264800 | -0.10258000 |

|    |             |             |             |
|----|-------------|-------------|-------------|
| Pd | -0.29825100 | -0.27223300 | 0.06369000  |
| P  | 1.62588600  | -1.70543900 | -0.20548800 |
| C  | -2.77751900 | 1.50135900  | -0.78643400 |
| C  | -2.06678200 | 0.62066400  | 0.06416300  |
| C  | -2.57671400 | 0.92957500  | 1.44058300  |
| C  | -3.77255200 | 2.10108700  | -0.02841600 |
| O  | -3.74957200 | 1.74776500  | 1.25959100  |
| C  | 2.93292100  | -0.78037300 | -1.09407900 |
| C  | 4.08370800  | -0.31278400 | -0.45967500 |
| C  | 2.69737500  | -0.43183400 | -2.43017500 |
| C  | 4.98554400  | 0.49341300  | -1.14949600 |
| H  | 4.26863600  | -0.55553700 | 0.58655600  |
| C  | 3.61146800  | 0.35051500  | -3.12353800 |
| H  | 1.79197400  | -0.78544000 | -2.92918100 |
| C  | 4.75535100  | 0.82015000  | -2.48069800 |
| H  | 5.85937700  | 0.88887300  | -0.63389200 |
| H  | 3.42457800  | 0.60647500  | -4.16577000 |
| H  | 5.46075800  | 1.45551700  | -3.01408600 |
| C  | 2.43015300  | -2.26371000 | 1.34255400  |
| C  | 2.29008000  | -1.44898900 | 2.47202800  |
| C  | 3.19199800  | -3.43239800 | 1.42408100  |
| C  | 2.91904400  | -1.79936500 | 3.66312500  |
| H  | 1.69862500  | -0.53175400 | 2.39606400  |
| C  | 3.80711000  | -3.78326600 | 2.62102400  |
| H  | 3.30074200  | -4.07481000 | 0.55045900  |
| C  | 3.67317900  | -2.96643700 | 3.74061300  |
| H  | 2.81780700  | -1.15419200 | 4.53532100  |
| H  | 4.39610700  | -4.69758900 | 2.67818200  |
| H  | 4.15983200  | -3.24145400 | 4.67550000  |
| C  | 1.46318400  | -3.24379500 | -1.19110900 |
| C  | 2.49465100  | -3.74067000 | -1.99558400 |
| C  | 0.26822600  | -3.96225100 | -1.09953500 |
| C  | 2.33103200  | -4.93391500 | -2.69107400 |
| H  | 3.43011100  | -3.18655000 | -2.07886100 |
| C  | 0.10663200  | -5.15712400 | -1.79323800 |
| H  | -0.54729500 | -3.57312100 | -0.48914100 |
| C  | 1.13719500  | -5.64372000 | -2.59124100 |
| H  | 3.14018300  | -5.31085100 | -3.31502800 |
| H  | -0.83250500 | -5.70382700 | -1.71322800 |
| H  | 1.01081300  | -6.57664100 | -3.13887400 |
| C  | -4.80428200 | 3.06274700  | -0.39189900 |
| C  | -5.30172100 | 3.13690200  | -1.69999400 |
| C  | -5.33529600 | 3.91027100  | 0.59105900  |
| C  | -6.29633000 | 4.05095700  | -2.01881900 |



|   |             |             |             |
|---|-------------|-------------|-------------|
| H | -4.93071100 | 2.45335200  | -2.46033900 |
| C | -6.32286500 | 4.82744000  | 0.26430400  |
| H | -4.95558400 | 3.84308100  | 1.60789900  |
| C | -6.80370600 | 4.90185500  | -1.04086900 |
| H | -6.68250900 | 4.09527200  | -3.03533700 |
| H | -6.72093600 | 5.48918300  | 1.03115900  |
| H | -7.58068200 | 5.62084800  | -1.29454700 |
| C | 1.80328200  | 2.40583900  | -0.19777700 |
| C | 2.90302900  | 3.16592400  | -0.56388400 |
| C | 3.93303500  | 3.38562400  | 0.34592700  |
| C | 3.84326000  | 2.85641700  | 1.62744100  |
| C | 2.74173000  | 2.09280600  | 1.99372200  |
| C | 1.69278500  | 1.83041100  | 1.08622900  |
| H | 1.00509100  | 2.20543700  | -0.91730000 |
| H | 2.98714900  | 3.57265700  | -1.57170700 |
| H | 4.65872600  | 3.03497800  | 2.32772100  |
| H | 2.67010600  | 1.67452500  | 2.99848800  |
| O | 0.66921500  | 1.07782700  | 1.44206800  |
| O | 5.09063700  | 4.04064400  | -0.02479000 |
| B | 5.13263200  | 5.33370000  | -0.43499700 |
| O | 6.37332200  | 5.79178700  | -0.80415600 |
| H | 6.38743900  | 6.71133500  | -1.08285300 |
| O | 3.98771700  | 6.08935300  | -0.45888800 |
| H | 4.11584900  | 6.99867200  | -0.74310100 |
| C | -4.25556300 | -4.32561000 | -2.78742500 |
| H | -4.78612600 | -4.96830200 | -2.07462300 |
| H | -5.00313500 | -3.89219100 | -3.46627200 |
| H | -3.60777900 | -4.96807600 | -3.40069700 |
| H | -1.77655800 | 1.61349800  | 1.79990000  |
| C | -2.46399600 | 1.77363600  | -2.21943500 |
| H | -3.01193500 | 1.10998600  | -2.90510000 |
| H | -2.69943200 | 2.81044400  | -2.48995700 |
| H | -1.39249600 | 1.62075600  | -2.39854000 |
| C | -2.78275600 | -0.13774500 | 2.46825800  |
| C | -1.65491300 | -0.62239800 | 3.13408600  |
| C | -4.03658100 | -0.68682000 | 2.72499300  |
| C | -1.77888100 | -1.68910200 | 4.01703700  |
| H | -0.68514900 | -0.15630900 | 2.94400400  |
| C | -4.15723600 | -1.74211800 | 3.62471900  |
| H | -4.91336100 | -0.29546600 | 2.21173700  |
| C | -3.02907300 | -2.25352400 | 4.26004300  |
| H | -0.89334000 | -2.07521200 | 4.51966400  |
| H | -5.13776000 | -2.17251900 | 3.82289300  |
| H | -3.12592300 | -3.08608400 | 4.95515500  |

**E<sub>a</sub>**

|    |             |             |             |
|----|-------------|-------------|-------------|
| C  | -3.80152200 | -1.88570500 | 4.15338800  |
| C  | -2.88684200 | -0.83489300 | 4.08797100  |
| C  | -2.09791100 | -0.62851200 | 2.96062800  |
| C  | -2.20888400 | -1.47974700 | 1.85863900  |
| C  | -3.12001300 | -2.54299900 | 1.92240400  |
| C  | -3.90069900 | -2.74054900 | 3.05311500  |
| H  | -2.78730900 | -0.16160900 | 4.94079500  |
| H  | -1.39074600 | 0.20253000  | 2.91236500  |
| H  | -3.21411800 | -3.22312000 | 1.07398000  |
| H  | -4.60066300 | -3.57681700 | 3.08580600  |
| Pd | 0.48795300  | -0.19088600 | 0.74654700  |
| P  | 2.73030800  | 0.61137900  | 0.44451200  |
| C  | -0.28736100 | -2.18263300 | 0.29564200  |
| C  | -1.36319200 | -1.30205900 | 0.65050800  |
| C  | -1.93058100 | -0.75841500 | -0.65445500 |
| C  | 0.02661500  | -1.86172200 | -1.04161900 |
| O  | -0.91553400 | -1.09594100 | -1.62658600 |
| C  | 4.01449400  | -0.69212600 | 0.32111300  |
| C  | 4.94986100  | -0.78124100 | -0.71067000 |
| C  | 4.03649300  | -1.64866300 | 1.34406300  |
| C  | 5.88804300  | -1.81138500 | -0.72152400 |
| H  | 4.94396000  | -0.04252400 | -1.51229700 |
| C  | 4.97243700  | -2.67549300 | 1.33358900  |
| H  | 3.31058300  | -1.57664900 | 2.15748600  |
| C  | 5.89952900  | -2.76018400 | 0.29556600  |
| H  | 6.61403100  | -1.87108000 | -1.53128800 |
| H  | 4.98241600  | -3.41020300 | 2.13726600  |
| H  | 6.63387100  | -3.56420700 | 0.28454800  |
| C  | 2.83695900  | 1.53058000  | -1.13621500 |
| C  | 2.47347700  | 0.86950200  | -2.31726700 |
| C  | 3.11943600  | 2.89727700  | -1.18268400 |
| C  | 2.39944400  | 1.56158500  | -3.51833200 |
| H  | 2.24847900  | -0.19818700 | -2.29931900 |
| C  | 3.03174700  | 3.59122400  | -2.38751200 |
| H  | 3.39378400  | 3.42837600  | -0.27139700 |
| C  | 2.67020300  | 2.92809300  | -3.55444100 |
| H  | 2.11769100  | 1.03160100  | -4.42759100 |
| H  | 3.24469800  | 4.65870700  | -2.40932400 |
| H  | 2.59697500  | 3.47474500  | -4.49321500 |
| C  | 3.45233200  | 1.76365700  | 1.66678200  |
| C  | 4.83564500  | 1.90271100  | 1.82492400  |
| C  | 2.57983100  | 2.56983900  | 2.40544700  |

|   |             |             |             |
|---|-------------|-------------|-------------|
| C | 5.34352800  | 2.83787100  | 2.71833200  |
| H | 5.51594700  | 1.27780300  | 1.24502800  |
| C | 3.09883300  | 3.50794200  | 3.29471900  |
| H | 1.49992900  | 2.45288400  | 2.27279900  |
| C | 4.47426600  | 3.64143200  | 3.45318400  |
| H | 6.42067500  | 2.94174600  | 2.84120600  |
| H | 2.41991000  | 4.13502200  | 3.87050000  |
| H | 4.87404600  | 4.37365900  | 4.15359800  |
| C | 1.02699900  | -2.40172900 | -1.95473500 |
| C | 0.81894500  | -2.27610200 | -3.33762300 |
| C | 2.19665300  | -3.02317800 | -1.49616500 |
| C | 1.76148100  | -2.75868400 | -4.23451500 |
| H | -0.08517200 | -1.78919500 | -3.69526100 |
| C | 3.13375200  | -3.50415300 | -2.39975800 |
| H | 2.39839500  | -3.09264300 | -0.42950100 |
| C | 2.92191500  | -3.37229100 | -3.76991700 |
| H | 1.58910400  | -2.65467600 | -5.30444200 |
| H | 4.04179900  | -3.97361200 | -2.02601800 |
| H | 3.66188000  | -3.74653300 | -4.47534200 |
| C | -0.86105400 | 2.59458400  | -0.42738200 |
| C | -1.81421900 | 3.17723000  | -1.25285100 |
| C | -3.11356500 | 3.36958000  | -0.79487800 |
| C | -3.44967600 | 2.98837300  | 0.50102200  |
| C | -2.49935200 | 2.39933700  | 1.32629200  |
| C | -1.17164200 | 2.18203400  | 0.89092500  |
| H | 0.15672700  | 2.43838900  | -0.79331400 |
| H | -1.56051100 | 3.49191000  | -2.26458100 |
| H | -4.46716200 | 3.15199800  | 0.85612200  |
| H | -2.76464600 | 2.09426600  | 2.33827100  |
| O | -0.27878200 | 1.61901600  | 1.68226000  |
| O | -4.02619000 | 3.98423500  | -1.62349200 |
| B | -5.14677500 | 3.37532100  | -2.09080100 |
| O | -5.90240700 | 4.11787800  | -2.96015900 |
| H | -6.72232000 | 3.69615600  | -3.23157800 |
| O | -5.45329000 | 2.09934000  | -1.68568000 |
| H | -6.18700600 | 1.68946300  | -2.15293500 |
| C | 0.25369200  | -3.29742200 | 1.13678100  |
| H | 0.12677700  | -4.26723200 | 0.63385800  |
| H | 1.31716500  | -3.18496800 | 1.37823900  |
| H | -0.29405600 | -3.33155800 | 2.08566400  |
| C | -4.67005800 | -2.08374200 | 5.36007000  |
| H | -5.65357100 | -1.61032200 | 5.22712100  |
| H | -4.85141800 | -3.14813600 | 5.55817400  |
| H | -4.21876000 | -1.64416200 | 6.25828800  |

|   |             |             |             |
|---|-------------|-------------|-------------|
| C | -3.25357700 | -1.35082900 | -1.05232700 |
| C | -4.41685200 | -0.69967700 | -0.64833900 |
| C | -3.33712700 | -2.57215400 | -1.72049700 |
| C | -5.65757600 | -1.27880300 | -0.89197100 |
| H | -4.34092000 | 0.26449500  | -0.14278700 |
| C | -4.57956900 | -3.14534700 | -1.97016000 |
| H | -2.42503600 | -3.07151700 | -2.05065800 |
| C | -5.74166400 | -2.50341300 | -1.54842800 |
| H | -6.56254100 | -0.76852700 | -0.56276400 |
| H | -4.64196600 | -4.09769400 | -2.49488000 |
| H | -6.71351600 | -2.95777800 | -1.73664800 |
| H | -2.00642400 | 0.34243200  | -0.63660600 |

**TS8<sub>a</sub>**

|    |             |             |             |
|----|-------------|-------------|-------------|
| C  | -2.48887200 | -3.33083400 | 2.84449800  |
| C  | -1.28109000 | -2.70847500 | 3.15734300  |
| C  | -0.58760300 | -1.95799200 | 2.20953800  |
| C  | -1.07930700 | -1.80865700 | 0.90517500  |
| C  | -2.28334100 | -2.45672000 | 0.58536500  |
| C  | -2.97597100 | -3.18704200 | 1.54082300  |
| H  | -0.87733600 | -2.80156100 | 4.16697800  |
| H  | 0.33646600  | -1.46547000 | 2.51416700  |
| H  | -2.71572900 | -2.35262400 | -0.40857000 |
| H  | -3.92874200 | -3.64784400 | 1.27145100  |
| Pd | -0.41296400 | -0.14201500 | -0.16162800 |
| P  | -2.57050400 | 0.99826700  | -0.22533900 |
| C  | 0.43689100  | -3.05120400 | -1.25681400 |
| C  | 0.55971700  | -2.01811700 | -0.40669500 |
| C  | 1.54860700  | -1.14556200 | 0.03813900  |
| C  | 1.67800600  | -3.82044800 | -1.58130800 |
| O  | 1.78908000  | -4.36197000 | -2.67093500 |
| C  | -2.57247400 | 2.64626300  | -1.00654000 |
| C  | -3.45467000 | 2.99975600  | -2.02977700 |
| C  | -1.66052600 | 3.59053700  | -0.52449100 |
| C  | -3.42034500 | 4.28352000  | -2.56801100 |
| H  | -4.17202600 | 2.27310100  | -2.41115700 |
| C  | -1.62986900 | 4.86932500  | -1.06359500 |
| H  | -0.95601600 | 3.32145900  | 0.26262500  |
| C  | -2.50724800 | 5.21601600  | -2.08851900 |
| H  | -4.10933400 | 4.55184300  | -3.36736200 |
| H  | -0.90507100 | 5.59096200  | -0.69095800 |
| H  | -2.47522700 | 6.21660000  | -2.51700400 |
| C  | -3.68384400 | -0.01070900 | -1.26445500 |
| C  | -3.22293600 | -0.36021100 | -2.54095100 |

|   |             |             |             |
|---|-------------|-------------|-------------|
| C | -4.89605300 | -0.52998900 | -0.80775600 |
| C | -3.96782100 | -1.21153200 | -3.34716800 |
| H | -2.26859100 | 0.03689200  | -2.89665300 |
| C | -5.63539300 | -1.39129900 | -1.61538000 |
| H | -5.25712400 | -0.27234000 | 0.18811900  |
| C | -5.17339700 | -1.73410100 | -2.88147300 |
| H | -3.60188900 | -1.47726600 | -4.33755300 |
| H | -6.57799300 | -1.79593200 | -1.24990400 |
| H | -5.75242800 | -2.40963800 | -3.50885700 |
| C | -3.50147400 | 1.26294500  | 1.32735300  |
| C | -4.54383700 | 2.19556600  | 1.38926100  |
| C | -3.19735500 | 0.49908900  | 2.45624200  |
| C | -5.27362300 | 2.35069400  | 2.56152400  |
| H | -4.78222400 | 2.80253400  | 0.51514300  |
| C | -3.93398300 | 0.65305500  | 3.62676800  |
| H | -2.37948700 | -0.21903100 | 2.41834100  |
| C | -4.97103500 | 1.57803400  | 3.68069900  |
| H | -6.08086500 | 3.08009900  | 2.60364300  |
| H | -3.68730500 | 0.04838300  | 4.49865400  |
| H | -5.54363800 | 1.70305900  | 4.59843800  |
| C | 2.79046200  | -3.88194100 | -0.59092400 |
| C | 2.56552600  | -4.00982100 | 0.78186300  |
| C | 4.09983200  | -3.83742300 | -1.07527900 |
| C | 3.64055100  | -4.07393300 | 1.66044800  |
| H | 1.54379300  | -4.05574100 | 1.16003500  |
| C | 5.17229800  | -3.87808600 | -0.19507800 |
| H | 4.25391600  | -3.74379000 | -2.14906300 |
| C | 4.94292100  | -3.99617600 | 1.17381000  |
| H | 3.46252100  | -4.18442100 | 2.72911500  |
| H | 6.19035400  | -3.81696900 | -0.57564800 |
| H | 5.78393000  | -4.03196200 | 1.86491800  |
| C | 1.48915500  | 2.23953500  | 0.88482200  |
| C | 2.55264700  | 2.91649100  | 1.47297700  |
| C | 3.46115300  | 3.60207600  | 0.67899400  |
| C | 3.27947500  | 3.64067900  | -0.70113300 |
| C | 2.22034400  | 2.96757600  | -1.28852400 |
| C | 1.31119900  | 2.21377500  | -0.51634500 |
| H | 0.78124200  | 1.68269100  | 1.50877200  |
| H | 2.69058900  | 2.90648200  | 2.55411700  |
| H | 3.99336700  | 4.19723700  | -1.30748600 |
| H | 2.09069400  | 2.96493100  | -2.36983700 |
| O | 0.34324900  | 1.54928400  | -1.11330300 |
| O | 4.52064300  | 4.28992800  | 1.23517900  |
| B | 5.52895600  | 3.67914500  | 1.90605500  |

|                      |             |             |             |
|----------------------|-------------|-------------|-------------|
| O                    | 6.48401900  | 4.51411900  | 2.42552900  |
| H                    | 7.20188600  | 4.06760700  | 2.88232100  |
| O                    | 5.55021900  | 2.30784000  | 2.02661900  |
| H                    | 6.30264000  | 1.96790000  | 2.51982200  |
| C                    | -0.79728600 | -3.43130600 | -2.00465100 |
| H                    | -1.43898400 | -4.09216300 | -1.40134900 |
| H                    | -1.39488600 | -2.55660000 | -2.28894800 |
| H                    | -0.50554100 | -3.97596800 | -2.90906500 |
| C                    | -3.24342100 | -4.13344800 | 3.86079800  |
| H                    | -2.82119700 | -4.01033200 | 4.86556800  |
| H                    | -4.30080200 | -3.83855300 | 3.90076600  |
| H                    | -3.22172800 | -5.20645700 | 3.62365600  |
| C                    | 2.64110400  | -0.63611400 | -0.79315100 |
| C                    | 3.73476100  | -0.04330800 | -0.15172400 |
| C                    | 2.64953300  | -0.73872400 | -2.19112800 |
| C                    | 4.82761700  | 0.40391400  | -0.88257000 |
| H                    | 3.72228300  | 0.08806900  | 0.93060400  |
| C                    | 3.74452200  | -0.29678000 | -2.91782300 |
| H                    | 1.78763700  | -1.16249000 | -2.70599500 |
| C                    | 4.84034900  | 0.26843200  | -2.26649400 |
| H                    | 5.65421800  | 0.88411700  | -0.36161000 |
| H                    | 3.74049100  | -0.38628000 | -4.00290500 |
| H                    | 5.69488200  | 0.61927800  | -2.84329000 |
| H                    | 1.71129000  | -1.03442200 | 1.11385200  |
| <b>G<sub>a</sub></b> |             |             |             |
| C                    | 0.60074600  | -5.22105400 | 2.01818100  |
| C                    | -0.30350700 | -4.28996200 | 1.50713400  |
| C                    | -0.00057600 | -2.93301400 | 1.48209300  |
| C                    | 1.22212000  | -2.47227700 | 1.96973900  |
| C                    | 2.13516700  | -3.40039300 | 2.47723300  |
| C                    | 1.82562500  | -4.75296400 | 2.50048000  |
| H                    | -1.26212100 | -4.63381400 | 1.11661900  |
| H                    | -0.71460800 | -2.22151500 | 1.06293100  |
| H                    | 3.10225800  | -3.05112300 | 2.84021700  |
| H                    | 2.55121700  | -5.46546500 | 2.89525200  |
| Pd                   | 0.57042800  | 0.31748700  | 0.62161200  |
| P                    | 0.48137500  | 0.87826300  | -1.69306100 |
| C                    | 1.02465100  | -0.05680400 | 2.78019400  |
| C                    | 1.62989500  | -1.04123800 | 1.94701000  |
| C                    | 2.54761100  | -0.57782600 | 0.95229500  |
| C                    | 1.85909500  | 1.13016800  | 3.22948000  |
| O                    | 3.06581300  | 0.99521100  | 3.37457400  |
| C                    | -1.05228100 | 0.35939400  | -2.52824000 |

|   |             |             |             |
|---|-------------|-------------|-------------|
| C | -1.65991000 | 1.13395400  | -3.51872600 |
| C | -1.59610200 | -0.88357500 | -2.19374900 |
| C | -2.79908000 | 0.66663000  | -4.16606700 |
| H | -1.24344200 | 2.10709500  | -3.78067200 |
| C | -2.73378700 | -1.34853200 | -2.84196700 |
| H | -1.13054700 | -1.48139300 | -1.40799800 |
| C | -3.33796000 | -0.57088500 | -3.82572600 |
| H | -3.27326200 | 1.27602500  | -4.93381400 |
| H | -3.17149900 | -2.30256700 | -2.55311800 |
| H | -4.24113800 | -0.92663400 | -4.31860600 |
| C | 0.55177800  | 2.69909100  | -1.87552500 |
| C | -0.06188100 | 3.48794400  | -0.89374300 |
| C | 1.19148500  | 3.31361700  | -2.95684400 |
| C | -0.02710800 | 4.87439900  | -0.99909200 |
| H | -0.57563300 | 3.00137200  | -0.06003800 |
| C | 1.22118500  | 4.70098700  | -3.05376500 |
| H | 1.67276600  | 2.70563500  | -3.72312100 |
| C | 0.61567300  | 5.48203300  | -2.07378800 |
| H | -0.49968400 | 5.48190000  | -0.22877300 |
| H | 1.72335400  | 5.17325600  | -3.89679900 |
| H | 0.64698400  | 6.56801000  | -2.14839800 |
| C | 1.79527000  | 0.27248300  | -2.81013200 |
| C | 1.52094900  | -0.47633500 | -3.95637600 |
| C | 3.12565100  | 0.54934600  | -2.47634900 |
| C | 2.56287200  | -0.93653500 | -4.75741600 |
| H | 0.48972200  | -0.69918700 | -4.22793800 |
| C | 4.16148700  | 0.09996700  | -3.28260900 |
| H | 3.34779800  | 1.12543500  | -1.57582100 |
| C | 3.88119700  | -0.65013100 | -4.42277500 |
| H | 2.33823000  | -1.51967300 | -5.64925400 |
| H | 5.19263900  | 0.31994500  | -3.01092800 |
| H | 4.69488200  | -1.01180500 | -5.04966300 |
| C | 1.21345000  | 2.41992800  | 3.60076900  |
| C | -0.04576200 | 2.81705700  | 3.13963000  |
| C | 1.95841400  | 3.28961700  | 4.40884200  |
| C | -0.54276500 | 4.07088400  | 3.48464200  |
| H | -0.63542700 | 2.17443900  | 2.48255900  |
| C | 1.44932400  | 4.52795400  | 4.76544800  |
| H | 2.94221400  | 2.96760900  | 4.74366700  |
| C | 0.19538300  | 4.92212500  | 4.29982200  |
| H | -1.51905300 | 4.37873400  | 3.11269900  |
| H | 2.03093400  | 5.19265300  | 5.40230500  |
| H | -0.20452000 | 5.89750200  | 4.57455700  |
| C | -2.93207400 | -0.56277000 | 1.08398200  |

|   |             |             |             |
|---|-------------|-------------|-------------|
| C | -4.14279800 | -1.13303600 | 0.70939300  |
| C | -4.96177100 | -0.48255200 | -0.20742000 |
| C | -4.56501600 | 0.74160700  | -0.73801500 |
| C | -3.35046000 | 1.30201700  | -0.37301900 |
| C | -2.49151600 | 0.66214100  | 0.54346400  |
| H | -2.30629800 | -1.05408100 | 1.83015300  |
| H | -4.46454300 | -2.08294400 | 1.13549200  |
| H | -5.21554800 | 1.23194000  | -1.46159700 |
| H | -3.02618400 | 2.25004500  | -0.80403200 |
| O | -1.34790800 | 1.22857700  | 0.89784200  |
| O | -6.13183600 | -1.04883100 | -0.66143300 |
| B | -7.18823300 | -1.36105700 | 0.13583500  |
| O | -8.24880300 | -1.94816200 | -0.50520900 |
| H | -8.99123600 | -2.16041300 | 0.06697800  |
| O | -7.14125900 | -1.08377300 | 1.47727700  |
| H | -7.93780200 | -1.31380500 | 1.96385300  |
| C | 0.26692700  | -6.68213000 | 2.06665500  |
| H | -0.56458700 | -6.92842500 | 1.39525500  |
| H | 1.12708500  | -7.30177800 | 1.78177800  |
| H | -0.02834600 | -6.99073000 | 3.07957000  |
| H | 3.10318600  | 0.32634000  | 1.20847400  |
| C | 3.27605500  | -1.44900700 | 0.01162600  |
| C | 4.67228300  | -1.34163300 | -0.01900200 |
| C | 2.66215000  | -2.37119100 | -0.84449800 |
| C | 5.43492100  | -2.14253100 | -0.86115100 |
| H | 5.16024700  | -0.62519400 | 0.64323200  |
| C | 3.42147900  | -3.15804200 | -1.69957600 |
| H | 1.57524200  | -2.45352100 | -0.85282000 |
| C | 4.81021900  | -3.05094200 | -1.70907900 |
| H | 6.52020400  | -2.05038100 | -0.85923800 |
| H | 2.92327600  | -3.85348800 | -2.37336400 |
| H | 5.40231300  | -3.67145900 | -2.38024000 |
| C | -0.12153400 | -0.38643600 | 3.70262700  |
| H | 0.12962800  | -0.14525600 | 4.74544900  |
| H | -1.01878100 | 0.19024800  | 3.44247500  |
| H | -0.38019100 | -1.45007400 | 3.65438500  |

**TS9<sub>a</sub>**

|   |             |             |            |
|---|-------------|-------------|------------|
| C | -2.58775300 | -4.35966400 | 3.26015000 |
| C | -2.64900000 | -2.96527600 | 3.24738400 |
| C | -2.04131000 | -2.22148900 | 2.24309500 |
| C | -1.34813400 | -2.86454400 | 1.21175000 |
| C | -1.27394900 | -4.26208200 | 1.22636500 |
| C | -1.88380300 | -4.99588200 | 2.23484100 |



|    |             |             |             |
|----|-------------|-------------|-------------|
| H  | -3.17785300 | -2.44935700 | 4.05006600  |
| H  | -2.05260900 | -1.12869100 | 2.26726300  |
| H  | -0.74344400 | -4.77961000 | 0.42526700  |
| H  | -1.81567900 | -6.08496500 | 2.22835000  |
| Pd | 0.47773100  | -0.37074600 | 0.66608700  |
| P  | 2.32408200  | 1.08668100  | 0.68804900  |
| C  | 0.62314200  | -2.28065500 | -0.36238900 |
| C  | -0.72989500 | -2.06557800 | 0.11979700  |
| C  | -1.57704000 | -1.34523300 | -0.81852700 |
| C  | 0.64324600  | -2.10901900 | -1.81133100 |
| O  | -0.43304200 | -1.85092500 | -2.40650900 |
| C  | 3.96764000  | 0.30165900  | 0.47070900  |
| C  | 4.90688700  | 0.71142300  | -0.47840100 |
| C  | 4.26410500  | -0.78971200 | 1.29661400  |
| C  | 6.11961600  | 0.03604000  | -0.60186400 |
| H  | 4.68730500  | 1.55906100  | -1.12757600 |
| C  | 5.47369900  | -1.46218100 | 1.17255400  |
| H  | 3.52878100  | -1.11669500 | 2.03530200  |
| C  | 6.40298600  | -1.05167800 | 0.21806700  |
| H  | 6.84668700  | 0.36557900  | -1.34323600 |
| H  | 5.69243900  | -2.31075200 | 1.81872400  |
| H  | 7.34996100  | -1.57949500 | 0.11654000  |
| C  | 2.19425300  | 2.26923200  | -0.70506300 |
| C  | 1.94044000  | 1.75520200  | -1.98427000 |
| C  | 2.20762300  | 3.65252700  | -0.51822500 |
| C  | 1.71373400  | 2.61014700  | -3.05457400 |
| H  | 1.90580500  | 0.67414500  | -2.13918800 |
| C  | 1.96444300  | 4.50722900  | -1.59067600 |
| H  | 2.38580400  | 4.06723700  | 0.47350800  |
| C  | 1.71720400  | 3.98985300  | -2.85683900 |
| H  | 1.51803000  | 2.19736500  | -4.04280100 |
| H  | 1.96158600  | 5.58407000  | -1.43048500 |
| H  | 1.51955800  | 4.66059000  | -3.69137900 |
| C  | 2.57236500  | 2.14799000  | 2.15387000  |
| C  | 3.82221200  | 2.68670100  | 2.48003300  |
| C  | 1.44923900  | 2.47169700  | 2.92248100  |
| C  | 3.94776400  | 3.54666200  | 3.56415200  |
| H  | 4.69919500  | 2.43577100  | 1.88190200  |
| C  | 1.58471600  | 3.33875100  | 4.00399300  |
| H  | 0.47926700  | 2.02923700  | 2.67217000  |
| C  | 2.82749900  | 3.87463700  | 4.32494800  |
| H  | 4.92195700  | 3.96316300  | 3.81633500  |
| H  | 0.71017400  | 3.59174500  | 4.60122600  |
| H  | 2.92711200  | 4.55007400  | 5.17360600  |

|   |             |             |             |
|---|-------------|-------------|-------------|
| C | 1.85359800  | -2.27330000 | -2.64703200 |
| C | 1.68614100  | -2.73236200 | -3.95954800 |
| C | 3.13724500  | -1.95130200 | -2.19386800 |
| C | 2.78429700  | -2.89401200 | -4.79183700 |
| H | 0.68139200  | -2.96138500 | -4.30848600 |
| C | 4.23195600  | -2.09032800 | -3.03842700 |
| H | 3.27872600  | -1.55013400 | -1.19176800 |
| C | 4.05949400  | -2.57167800 | -4.33278400 |
| H | 2.64608200  | -3.26605500 | -5.80553000 |
| H | 5.22118600  | -1.81427600 | -2.67609400 |
| H | 4.91990600  | -2.68908300 | -4.98972500 |
| C | -1.45340900 | 2.20444800  | -0.10308600 |
| C | -2.36115000 | 2.98504300  | -0.81043100 |
| C | -3.66801300 | 3.13111800  | -0.35828100 |
| C | -4.05945600 | 2.48902800  | 0.81589400  |
| C | -3.15589900 | 1.70379800  | 1.51881800  |
| C | -1.81364100 | 1.54056700  | 1.09495400  |
| H | -0.42893200 | 2.10873000  | -0.46680300 |
| H | -2.05570300 | 3.50693800  | -1.71711500 |
| H | -5.08008000 | 2.60664000  | 1.17799100  |
| H | -3.46181200 | 1.20442200  | 2.43850700  |
| O | -0.97704900 | 0.81846300  | 1.80378100  |
| O | -4.49693200 | 3.98963200  | -1.04972100 |
| B | -5.78104600 | 3.76683000  | -1.41215000 |
| O | -6.41418100 | 4.82516500  | -2.01200400 |
| H | -7.31581800 | 4.64858300  | -2.29356900 |
| O | -6.37882000 | 2.54501200  | -1.18804300 |
| H | -7.29864900 | 2.50706900  | -1.46740100 |
| C | 1.58909100  | -3.21819900 | 0.32354400  |
| H | 1.59832200  | -4.21938000 | -0.13587100 |
| H | 2.61941400  | -2.84433800 | 0.29796300  |
| H | 1.31438800  | -3.33571300 | 1.37777800  |
| C | -3.27138900 | -5.15705300 | 4.33055500  |
| H | -4.23959800 | -5.54576400 | 3.98313900  |
| H | -2.67064300 | -6.02344100 | 4.63684700  |
| H | -3.46734100 | -4.54936400 | 5.22245500  |
| C | -2.99563500 | -1.57584700 | -1.00610700 |
| C | -3.82987000 | -0.46520600 | -1.20103600 |
| C | -3.54671100 | -2.86750500 | -1.01322500 |
| C | -5.19938100 | -0.63940100 | -1.35040400 |
| H | -3.40376200 | 0.53979800  | -1.20042100 |
| C | -4.90586300 | -3.03894900 | -1.20935500 |
| H | -2.89521100 | -3.72862800 | -0.87707900 |
| C | -5.73309900 | -1.92420300 | -1.36331300 |

|   |             |             |             |
|---|-------------|-------------|-------------|
| H | -5.83273700 | 0.23969400  | -1.45080300 |
| H | -5.33020100 | -4.04101200 | -1.23195200 |
| H | -6.80536300 | -2.06519000 | -1.49516000 |
| H | -1.27051300 | -0.34389500 | -1.13453900 |

**TS10<sub>a</sub>**

|    |             |             |             |
|----|-------------|-------------|-------------|
| C  | 4.29187200  | -2.98919000 | -1.13890700 |
| C  | 3.65415100  | -1.93697300 | -1.79840800 |
| C  | 2.30006300  | -1.70093200 | -1.62651800 |
| C  | 1.53464200  | -2.48680600 | -0.75387800 |
| C  | 2.16740800  | -3.55833500 | -0.11007800 |
| C  | 3.52165900  | -3.80027800 | -0.30508400 |
| H  | 4.23404500  | -1.26131900 | -2.42947000 |
| H  | 1.83439800  | -0.84628200 | -2.11119200 |
| H  | 1.60185900  | -4.21777200 | 0.54612300  |
| H  | 3.99403200  | -4.63869300 | 0.20897300  |
| Pd | -0.26034800 | -0.10960200 | 0.17869400  |
| P  | -1.47562700 | 1.81978700  | 0.65197600  |
| C  | -0.88785900 | -2.04626300 | -1.61543200 |
| C  | 0.09673300  | -2.19444700 | -0.55400300 |
| C  | -0.70014900 | -2.49870700 | 0.62064800  |
| C  | -2.10517300 | -2.36300600 | -1.07997800 |
| O  | -1.98652100 | -2.76972900 | 0.22429000  |
| C  | -2.51798500 | 2.04505500  | -0.84324100 |
| C  | -3.90662400 | 2.18030300  | -0.79741700 |
| C  | -1.85917700 | 2.05789400  | -2.08189700 |
| C  | -4.63307400 | 2.32819000  | -1.97731200 |
| H  | -4.42787500 | 2.16864100  | 0.15982800  |
| C  | -2.59177900 | 2.21284400  | -3.25303600 |
| H  | -0.77241100 | 1.93446600  | -2.10877600 |
| C  | -3.97864500 | 2.34856400  | -3.20420800 |
| H  | -5.71665300 | 2.42889800  | -1.93281400 |
| H  | -2.07506700 | 2.22684700  | -4.21198600 |
| H  | -4.54841200 | 2.46949600  | -4.12503600 |
| C  | -2.68649900 | 1.79632300  | 2.02143100  |
| C  | -3.39699500 | 0.61173800  | 2.24699800  |
| C  | -2.95231100 | 2.91454600  | 2.81395900  |
| C  | -4.36727600 | 0.55263400  | 3.23888800  |
| H  | -3.18694400 | -0.26796600 | 1.63256400  |
| C  | -3.91452500 | 2.84774200  | 3.81817500  |
| H  | -2.40255600 | 3.84081900  | 2.64867900  |
| C  | -4.62416400 | 1.67090000  | 4.02948600  |
| H  | -4.91708300 | -0.37254100 | 3.40292400  |
| H  | -4.11041700 | 3.72221400  | 4.43659100  |

|   |             |             |             |
|---|-------------|-------------|-------------|
| H | -5.37643300 | 1.62059900  | 4.81503300  |
| C | -0.57361300 | 3.39711900  | 0.78344000  |
| C | -1.15914500 | 4.61079500  | 0.40460700  |
| C | 0.75156900  | 3.37860000  | 1.21864300  |
| C | -0.42419800 | 5.78795900  | 0.47103800  |
| H | -2.18965100 | 4.62920700  | 0.04629400  |
| C | 1.49308800  | 4.55428100  | 1.26255600  |
| H | 1.22196600  | 2.43171400  | 1.47949200  |
| C | 0.90396300  | 5.75861200  | 0.89262900  |
| H | -0.88256600 | 6.73022600  | 0.17468300  |
| H | 2.53880900  | 4.51739900  | 1.56391500  |
| H | 1.48489500  | 6.67927300  | 0.91879400  |
| C | -3.46100800 | -2.30275700 | -1.60688400 |
| C | -4.41068200 | -3.26585200 | -1.24110600 |
| C | -3.84106000 | -1.25802200 | -2.45893800 |
| C | -5.70316400 | -3.20038800 | -1.74178500 |
| H | -4.12086800 | -4.06985800 | -0.56648400 |
| C | -5.13716200 | -1.19818600 | -2.95635400 |
| H | -3.12835800 | -0.46781700 | -2.69986800 |
| C | -6.06885800 | -2.16989500 | -2.60557300 |
| H | -6.43141200 | -3.95832100 | -1.45764400 |
| H | -5.42047500 | -0.37125300 | -3.60621300 |
| H | -7.08422200 | -2.11990300 | -2.99550900 |
| C | 2.82219200  | 0.88182100  | 0.22997000  |
| C | 4.16291300  | 1.15238600  | 0.47320000  |
| C | 4.91296200  | 1.85054000  | -0.46528700 |
| C | 4.30596600  | 2.28946600  | -1.63769900 |
| C | 2.96629600  | 2.01985200  | -1.87951700 |
| C | 2.17688300  | 1.30104700  | -0.95488100 |
| H | 2.24239300  | 0.29871800  | 0.95317400  |
| H | 4.63893500  | 0.80854000  | 1.39118100  |
| H | 4.90282200  | 2.84803600  | -2.35816800 |
| H | 2.49135500  | 2.35553400  | -2.80109800 |
| O | 0.92188200  | 1.02525000  | -1.23615800 |
| O | 6.23658900  | 2.17176300  | -0.23798800 |
| B | 7.21404700  | 1.24937600  | -0.05750800 |
| O | 8.45482500  | 1.75472600  | 0.23752400  |
| H | 9.14532400  | 1.09205700  | 0.32347700  |
| O | 6.93629900  | -0.09278000 | -0.17564100 |
| H | 7.68599300  | -0.66531900 | 0.01229300  |
| C | -0.59927000 | -1.66459400 | -3.02534600 |
| H | -1.45343200 | -1.88179900 | -3.67706600 |
| H | -0.36166500 | -0.59274900 | -3.10312500 |
| H | 0.27188200  | -2.21614300 | -3.40328800 |

|   |             |             |             |
|---|-------------|-------------|-------------|
| C | 5.75650400  | -3.23391300 | -1.33929300 |
| H | 6.31260600  | -2.28864800 | -1.29149000 |
| H | 6.15994400  | -3.91762200 | -0.58153900 |
| H | 5.95741500  | -3.67987300 | -2.32409900 |
| C | -0.26657200 | -3.18072000 | 1.86022000  |
| C | 0.68816200  | -2.59060700 | 2.69181700  |
| C | -0.77523100 | -4.44083300 | 2.17882600  |
| C | 1.15129500  | -3.26737700 | 3.81113200  |
| H | 1.06564900  | -1.59651100 | 2.44506800  |
| C | -0.31577700 | -5.11067900 | 3.30790000  |
| H | -1.52139800 | -4.89759200 | 1.53191500  |
| C | 0.65148800  | -4.53030600 | 4.12166700  |
| H | 1.90003400  | -2.80316800 | 4.45024400  |
| H | -0.71505000 | -6.09429900 | 3.54948300  |
| H | 1.01097400  | -5.05769800 | 5.00355200  |
| H | -1.02776900 | -1.09625600 | 1.21129600  |

**IM8**

|    |             |             |             |
|----|-------------|-------------|-------------|
| Pd | -0.67086600 | 0.74919500  | -0.14527400 |
| P  | -2.52565400 | -0.67810100 | -0.17392900 |
| C  | -2.07438300 | -2.44126500 | -0.07995800 |
| C  | -2.51380700 | -3.27932600 | 0.94668900  |
| C  | -1.22070100 | -2.94836200 | -1.06383500 |
| C  | -2.09783900 | -4.60639300 | 0.98746700  |
| H  | -3.17542600 | -2.89264300 | 1.72126700  |
| C  | -0.81222600 | -4.27538100 | -1.02392800 |
| H  | -0.85831000 | -2.29196200 | -1.85620900 |
| C  | -1.24358500 | -5.10314600 | 0.00822900  |
| H  | -2.43700500 | -5.25257500 | 1.79566800  |
| H  | -0.12007300 | -4.65048100 | -1.77573000 |
| H  | -0.90553500 | -6.13703200 | 0.05262600  |
| C  | -3.48099900 | -0.34661200 | 1.34897100  |
| C  | -2.77279500 | -0.28034500 | 2.55767100  |
| C  | -4.86225500 | -0.14438700 | 1.34042700  |
| C  | -3.45454800 | -0.02350200 | 3.74078800  |
| H  | -1.69187000 | -0.44573400 | 2.54892200  |
| C  | -5.53442600 | 0.12231600  | 2.53040500  |
| H  | -5.41773300 | -0.19238700 | 0.40383800  |
| C  | -4.83280900 | 0.18148700  | 3.72925000  |
| H  | -2.90450000 | 0.02221300  | 4.67949400  |
| H  | -6.61149900 | 0.28200600  | 2.51759600  |
| H  | -5.36036300 | 0.38889600  | 4.65922000  |
| C  | -3.76788400 | -0.60537800 | -1.51370800 |
| C  | -4.55362900 | -1.72072200 | -1.82298800 |

|   |             |             |             |
|---|-------------|-------------|-------------|
| C | -3.98898400 | 0.59584600  | -2.19053300 |
| C | -5.54483900 | -1.63110900 | -2.79404900 |
| H | -4.38802300 | -2.66244200 | -1.29899600 |
| C | -4.98654500 | 0.68564800  | -3.15548900 |
| H | -3.36568700 | 1.46025300  | -1.95772100 |
| C | -5.76349800 | -0.42799700 | -3.45942400 |
| H | -6.14835500 | -2.50529000 | -3.03307800 |
| H | -5.15086100 | 1.62692500  | -3.67748000 |
| H | -6.53895900 | -0.35941600 | -4.22084100 |
| C | 1.56522700  | -1.64969700 | -0.31052500 |
| C | 2.44979300  | -2.66758800 | -0.64475900 |
| C | 2.75558500  | -3.65537300 | 0.28250200  |
| C | 2.15572000  | -3.62497200 | 1.53889900  |
| C | 1.27653300  | -2.60543200 | 1.87303800  |
| C | 0.96002100  | -1.57548700 | 0.96070800  |
| H | 1.32514600  | -0.88185700 | -1.04925700 |
| H | 2.91594300  | -2.68714800 | -1.62985300 |
| H | 2.39048000  | -4.41724200 | 2.24912400  |
| H | 0.80232700  | -2.58019000 | 2.85424400  |
| O | 0.13128100  | -0.61183100 | 1.31849000  |
| O | 3.59185900  | -4.71176900 | -0.01934600 |
| B | 4.84594700  | -4.59289000 | -0.51852200 |
| O | 5.49186500  | -5.77910600 | -0.76563700 |
| H | 6.37486400  | -5.68290800 | -1.13228400 |
| O | 5.40199700  | -3.35487600 | -0.74702900 |
| H | 6.31297800  | -3.39252400 | -1.05264100 |
| P | 1.09426500  | 2.30664300  | -0.10371600 |
| C | 1.65682600  | 2.79038000  | 1.56893100  |
| C | 1.53034900  | 1.85834000  | 2.60554500  |
| C | 2.23660600  | 4.03782500  | 1.82053000  |
| C | 1.99448500  | 2.17807800  | 3.87839500  |
| H | 1.07314800  | 0.88559500  | 2.39940600  |
| C | 2.68895300  | 4.35047100  | 3.09731500  |
| H | 2.32963200  | 4.77151900  | 1.02030300  |
| C | 2.57014700  | 3.42049400  | 4.12611800  |
| H | 1.89934300  | 1.44941400  | 4.68190700  |
| H | 3.13549300  | 5.32516300  | 3.28835500  |
| H | 2.92541200  | 3.66742900  | 5.12566100  |
| C | 0.86010400  | 3.90724400  | -0.95712300 |
| C | 1.90437000  | 4.56827500  | -1.61010100 |
| C | -0.39105800 | 4.52342300  | -0.86998000 |
| C | 1.69554500  | 5.82360300  | -2.17354300 |
| H | 2.88558800  | 4.09801800  | -1.67985100 |
| C | -0.59454500 | 5.78218800  | -1.42339600 |

|   |             |             |             |
|---|-------------|-------------|-------------|
| H | -1.20859900 | 4.00336600  | -0.36902200 |
| C | 0.44769000  | 6.43187900  | -2.07856500 |
| H | 2.51249900  | 6.32851200  | -2.68668700 |
| H | -1.57256300 | 6.25469700  | -1.34814500 |
| H | 0.28647000  | 7.41447400  | -2.51939900 |
| C | 2.55619000  | 1.55046300  | -0.89607300 |
| C | 2.53394800  | 1.33782000  | -2.28013600 |
| C | 3.59008900  | 1.00530400  | -0.13432000 |
| C | 3.53804700  | 0.59580500  | -2.88880800 |
| H | 1.71610700  | 1.74306700  | -2.87904800 |
| C | 4.58401500  | 0.24715000  | -0.74522200 |
| H | 3.60065200  | 1.14116500  | 0.94658800  |
| C | 4.55921300  | 0.04123400  | -2.11905800 |
| H | 3.51437000  | 0.43478000  | -3.96552900 |
| H | 5.36334500  | -0.21038800 | -0.13911600 |
| H | 5.32819100  | -0.56786200 | -2.59136200 |
| H | -1.38031500 | 1.70979600  | -1.17202500 |

## F

|    |             |             |             |
|----|-------------|-------------|-------------|
| P  | 1.53600100  | 1.76724200  | -0.13684400 |
| Pd | -0.31252100 | 0.49501200  | -0.51168400 |
| P  | 0.58678500  | -1.75011100 | 0.05544900  |
| C  | 2.37946600  | -2.02544100 | 0.36886600  |
| C  | 2.95164100  | -1.61382200 | 1.58048100  |
| C  | 3.21181100  | -2.56890100 | -0.61392800 |
| C  | 4.31532800  | -1.75762300 | 1.80690200  |
| H  | 2.32706400  | -1.18635200 | 2.36516300  |
| C  | 4.57748800  | -2.71103300 | -0.38569100 |
| H  | 2.79032000  | -2.88934900 | -1.56660500 |
| C  | 5.13307500  | -2.31112800 | 0.82474100  |
| H  | 4.73685300  | -1.43589100 | 2.75864300  |
| H  | 5.20955000  | -3.13850000 | -1.16308600 |
| H  | 6.20109900  | -2.42958200 | 1.00323600  |
| C  | 0.24223900  | -2.91250400 | -1.31410000 |
| C  | 0.23334800  | -4.29688300 | -1.12523900 |
| C  | 0.04113300  | -2.39159900 | -2.59380100 |
| C  | 0.03553000  | -5.14851900 | -2.20513100 |
| H  | 0.37655700  | -4.71220000 | -0.12718600 |
| C  | -0.15148100 | -3.24596100 | -3.67517100 |
| H  | 0.01319300  | -1.30995300 | -2.73247600 |
| C  | -0.15370100 | -4.62321700 | -3.48114200 |
| H  | 0.02525600  | -6.22634500 | -2.05074500 |
| H  | -0.31308700 | -2.83191600 | -4.66902500 |
| H  | -0.31131100 | -5.29216000 | -4.32587200 |

|   |             |             |             |
|---|-------------|-------------|-------------|
| C | -0.21964900 | -2.49490800 | 1.52524100  |
| C | -1.50672200 | -2.05302500 | 1.85179900  |
| C | 0.37905500  | -3.49046700 | 2.30666900  |
| C | -2.17978500 | -2.59693700 | 2.94103500  |
| H | -1.98795400 | -1.29320900 | 1.23693000  |
| C | -0.29807100 | -4.03093200 | 3.39463400  |
| H | 1.38385000  | -3.84175200 | 2.07091200  |
| C | -1.57719800 | -3.58371700 | 3.71433500  |
| H | -3.18173400 | -2.24400200 | 3.17881300  |
| H | 0.17728500  | -4.80542300 | 3.99489500  |
| H | -2.10435800 | -4.00788700 | 4.56767600  |
| C | 2.00661900  | 1.77557300  | 1.63176900  |
| C | 3.13917000  | 2.44513300  | 2.10866500  |
| C | 1.16715800  | 1.12496100  | 2.54058000  |
| C | 3.45809400  | 2.40615600  | 3.46083100  |
| H | 3.77128000  | 3.00985700  | 1.42228300  |
| C | 1.47809100  | 1.10028600  | 3.89722300  |
| H | 0.26461700  | 0.62971200  | 2.17372700  |
| C | 2.63244000  | 1.72652800  | 4.35463000  |
| H | 4.34823700  | 2.91867200  | 3.82189500  |
| H | 0.81657400  | 0.58676600  | 4.59277800  |
| H | 2.88275100  | 1.70271100  | 5.41400200  |
| C | 2.94800400  | 1.14345900  | -1.11599200 |
| C | 2.68163500  | 0.91337100  | -2.47251600 |
| C | 4.22446900  | 0.88340400  | -0.61838600 |
| C | 3.68050400  | 0.44756300  | -3.31715400 |
| H | 1.67807500  | 1.09939900  | -2.86109000 |
| C | 5.22205000  | 0.40992700  | -1.46679800 |
| H | 4.44237900  | 1.02338100  | 0.43897600  |
| C | 4.95506200  | 0.19635300  | -2.81398600 |
| H | 3.46276700  | 0.27509900  | -4.36983400 |
| H | 6.21137500  | 0.19840400  | -1.06334600 |
| H | 5.73787100  | -0.17425300 | -3.47395400 |
| C | 1.50768300  | 3.55842100  | -0.52852400 |
| C | 0.39332100  | 4.30224000  | -0.12990300 |
| C | 2.58242200  | 4.20610000  | -1.14089100 |
| C | 0.35875300  | 5.67537800  | -0.33249500 |
| H | -0.45546400 | 3.79444300  | 0.33108400  |
| C | 2.54019700  | 5.58178700  | -1.35223900 |
| H | 3.45405300  | 3.63445800  | -1.46060700 |
| C | 1.43184200  | 6.31674300  | -0.94693400 |
| H | -0.51447400 | 6.24591700  | -0.02111100 |
| H | 3.37757100  | 6.07879000  | -1.83961000 |
| H | 1.39951200  | 7.39192600  | -1.11529900 |



|   |              |             |             |
|---|--------------|-------------|-------------|
| C | -3.49172500  | 0.82812300  | 0.39966400  |
| C | -4.78599700  | 1.16767900  | 0.77988500  |
| C | -5.87786000  | 0.54745200  | 0.18846700  |
| C | -5.66655900  | -0.42747800 | -0.78397100 |
| C | -4.37707000  | -0.76337800 | -1.16617600 |
| C | -3.24713100  | -0.14277400 | -0.59127800 |
| H | -2.63318800  | 1.31973500  | 0.86500900  |
| H | -4.96429900  | 1.91810500  | 1.54942400  |
| H | -6.52179700  | -0.91742800 | -1.24715600 |
| H | -4.20420700  | -1.52397100 | -1.92656400 |
| O | -2.04393200  | -0.53678900 | -0.96917700 |
| O | -7.13816500  | 0.87430100  | 0.64380500  |
| B | -8.18999400  | 1.21527300  | -0.14174700 |
| O | -9.35579000  | 1.49015700  | 0.53030700  |
| H | -10.09507000 | 1.71814800  | -0.03970200 |
| O | -8.05277000  | 1.27111100  | -1.50631200 |
| H | -8.84290200  | 1.55394900  | -1.97509200 |
| H | -0.99691900  | 1.86824500  | -0.90873400 |

### TS11

|    |             |             |             |
|----|-------------|-------------|-------------|
| P  | -2.02980900 | 1.44433800  | -0.21834600 |
| Pd | -0.29014500 | 0.35075500  | -1.22204100 |
| P  | 0.04048400  | -1.82092400 | -0.04945200 |
| C  | -1.14671800 | -2.50822300 | 1.16755500  |
| C  | -2.45946700 | -2.75178200 | 0.74286400  |
| C  | -0.81427700 | -2.74307600 | 2.50223500  |
| C  | -3.41031500 | -3.24644200 | 1.62560100  |
| H  | -2.73384800 | -2.56125900 | -0.29681700 |
| C  | -1.77112900 | -3.23042700 | 3.38971000  |
| H  | 0.19948700  | -2.54571400 | 2.85069200  |
| C  | -3.06613500 | -3.48944300 | 2.95447300  |
| H  | -4.42362400 | -3.44009200 | 1.27615800  |
| H  | -1.49735900 | -3.41477100 | 4.42792500  |
| H  | -3.80901100 | -3.87864900 | 3.64943700  |
| C  | 1.64279200  | -1.84086800 | 0.83558300  |
| C  | 2.45324800  | -2.97521000 | 0.93675800  |
| C  | 2.07388000  | -0.64007500 | 1.40650700  |
| C  | 3.67701800  | -2.90153400 | 1.59448200  |
| H  | 2.13320700  | -3.91540000 | 0.48642800  |
| C  | 3.29424200  | -0.56903300 | 2.06763500  |
| H  | 1.46342200  | 0.25554100  | 1.28595600  |
| C  | 4.09958200  | -1.69999000 | 2.15740200  |
| H  | 4.30974800  | -3.78590300 | 1.65701400  |
| H  | 3.64128300  | 0.37997100  | 2.47387900  |

|   |             |             |             |
|---|-------------|-------------|-------------|
| H | 5.07011100  | -1.63538900 | 2.64697000  |
| C | 0.20197100  | -3.16280500 | -1.28946000 |
| C | 0.65951100  | -2.79311500 | -2.56046200 |
| C | -0.08164500 | -4.50644900 | -1.02598100 |
| C | 0.83862500  | -3.75938900 | -3.54561400 |
| H | 0.88020600  | -1.74283200 | -2.77879900 |
| C | 0.09305100  | -5.46753100 | -2.01676300 |
| H | -0.44348600 | -4.80200000 | -0.04039200 |
| C | 0.55380800  | -5.09482500 | -3.27637000 |
| H | 1.19553300  | -3.46309100 | -4.53071300 |
| H | -0.13197400 | -6.51172200 | -1.80364500 |
| H | 0.68850400  | -5.84849400 | -4.05103300 |
| C | -3.69573400 | 0.86856000  | -0.71958900 |
| C | -4.87011200 | 1.48846000  | -0.28021200 |
| C | -3.78480600 | -0.23451400 | -1.57162300 |
| C | -6.11041800 | 1.00029600  | -0.67353300 |
| H | -4.81357200 | 2.36170800  | 0.37087200  |
| C | -5.02695800 | -0.72421400 | -1.96504500 |
| H | -2.86268700 | -0.69599600 | -1.93430900 |
| C | -6.18948600 | -0.10820000 | -1.51375300 |
| H | -7.01987100 | 1.48902100  | -0.32758900 |
| H | -5.08413000 | -1.58262200 | -2.63240900 |
| H | -7.16211700 | -0.48604500 | -1.82526200 |
| C | -1.95142500 | 1.14962700  | 1.58708100  |
| C | -0.79056800 | 1.57375100  | 2.24717700  |
| C | -2.91567800 | 0.43540600  | 2.29865400  |
| C | -0.59729300 | 1.28528200  | 3.59132100  |
| H | -0.02699600 | 2.12613500  | 1.69291300  |
| C | -2.71955700 | 0.14686300  | 3.64779100  |
| H | -3.82161500 | 0.09459600  | 1.79796300  |
| C | -1.56320300 | 0.56687600  | 4.29399900  |
| H | 0.31356400  | 1.61357500  | 4.09001100  |
| H | -3.47454500 | -0.42017900 | 4.19032700  |
| H | -1.40864600 | 0.33083700  | 5.34576100  |
| C | -2.15395400 | 3.27332200  | -0.33153800 |
| C | -1.74061700 | 3.89118700  | -1.51391700 |
| C | -2.67323900 | 4.06074500  | 0.70195400  |
| C | -1.86211300 | 5.26725600  | -1.67249800 |
| H | -1.31083000 | 3.27975400  | -2.30917800 |
| C | -2.78646500 | 5.43848000  | 0.54598200  |
| H | -2.97952500 | 3.59587700  | 1.63980400  |
| C | -2.38486800 | 6.04256300  | -0.64180700 |
| H | -1.53579700 | 5.73584200  | -2.59945900 |
| H | -3.18631300 | 6.04319700  | 1.35854900  |

|   |             |             |             |
|---|-------------|-------------|-------------|
| H | -2.47091800 | 7.12151400  | -0.76045000 |
| C | 3.46035300  | -0.19895800 | -1.83820700 |
| C | 4.57570400  | -0.02727600 | -1.03045300 |
| C | 4.71236500  | 1.12227400  | -0.26073300 |
| C | 3.73519700  | 2.11008000  | -0.31401100 |
| C | 2.62098600  | 1.94419200  | -1.12813800 |
| C | 2.45463600  | 0.78112100  | -1.90164100 |
| H | 3.33945800  | -1.10759300 | -2.42744000 |
| H | 5.33882800  | -0.80127100 | -0.95709400 |
| H | 3.85038100  | 3.00976600  | 0.28965500  |
| H | 1.84978700  | 2.71629900  | -1.17062900 |
| O | 1.39399600  | 0.58088400  | -2.70053400 |
| O | 5.77472900  | 1.20907700  | 0.61398100  |
| B | 6.72007200  | 2.18534100  | 0.55989700  |
| O | 7.69118300  | 2.11016500  | 1.52533300  |
| H | 8.35257600  | 2.80581700  | 1.47741900  |
| O | 6.65432600  | 3.14958500  | -0.41132100 |
| H | 7.37831900  | 3.78197000  | -0.40180400 |
| H | 0.18001200  | 1.44950000  | -2.28951700 |

### IM9

|    |             |             |             |
|----|-------------|-------------|-------------|
| P  | -0.99610200 | 2.15364600  | -0.06566400 |
| Pd | 0.11060200  | 0.11377500  | -0.66590000 |
| P  | -1.59162700 | -1.55176200 | -0.11253700 |
| C  | -3.33178800 | -1.21280000 | 0.40354200  |
| C  | -4.20251000 | -0.72109100 | -0.57663900 |
| C  | -3.81069500 | -1.37614000 | 1.70481400  |
| C  | -5.51130100 | -0.38110400 | -0.26141800 |
| H  | -3.84831700 | -0.60238000 | -1.60148300 |
| C  | -5.12706800 | -1.04468000 | 2.01970600  |
| H  | -3.15205400 | -1.75939000 | 2.48382000  |
| C  | -5.97694300 | -0.53848100 | 1.04298100  |
| H  | -6.17218800 | 0.00442100  | -1.03609100 |
| H  | -5.48735300 | -1.18461200 | 3.03852400  |
| H  | -7.00341400 | -0.27403400 | 1.29265100  |
| C  | -0.87236400 | -2.33790400 | 1.37826200  |
| C  | -0.54873100 | -3.69092400 | 1.47322500  |
| C  | -0.57953300 | -1.49063100 | 2.45728100  |
| C  | 0.04314000  | -4.19082300 | 2.63067500  |
| H  | -0.74071400 | -4.36044700 | 0.63602400  |
| C  | -0.00847200 | -1.99671700 | 3.61774300  |
| H  | -0.80469600 | -0.42365300 | 2.39168600  |
| C  | 0.30433200  | -3.35144300 | 3.70718400  |
| H  | 0.30855600  | -5.24594800 | 2.68190700  |

|   |             |             |             |
|---|-------------|-------------|-------------|
| H | 0.19737500  | -1.32332400 | 4.44925500  |
| H | 0.76117000  | -3.74929000 | 4.61234000  |
| C | -1.88091000 | -2.91430200 | -1.30722400 |
| C | -1.27832800 | -2.83786900 | -2.56347300 |
| C | -2.72618000 | -3.99305400 | -1.02140200 |
| C | -1.49552400 | -3.83134100 | -3.51523600 |
| H | -0.63569600 | -1.98412500 | -2.78698200 |
| C | -2.93677300 | -4.98912900 | -1.96659200 |
| H | -3.22358300 | -4.04836800 | -0.05181800 |
| C | -2.31986300 | -4.90929300 | -3.21406600 |
| H | -1.02098100 | -3.75964400 | -4.49278500 |
| H | -3.58997000 | -5.82871000 | -1.73369800 |
| H | -2.49011900 | -5.68829500 | -3.95578400 |
| C | -2.54375400 | 2.45936400  | -1.00792700 |
| C | -3.50185600 | 3.40340200  | -0.62368200 |
| C | -2.70726800 | 1.78064600  | -2.21777800 |
| C | -4.61906900 | 3.63359800  | -1.41715400 |
| H | -3.37358400 | 3.96312900  | 0.30367000  |
| C | -3.81592200 | 2.02594300  | -3.02376900 |
| H | -1.95476600 | 1.04685700  | -2.52055500 |
| C | -4.77755200 | 2.94502200  | -2.61840600 |
| H | -5.36504100 | 4.36208600  | -1.10310100 |
| H | -3.92926400 | 1.49427400  | -3.96755300 |
| H | -5.64879100 | 3.13576800  | -3.24326700 |
| C | -1.47252700 | 2.11629000  | 1.70302000  |
| C | -0.44430000 | 2.22033600  | 2.65273500  |
| C | -2.75995100 | 1.79323900  | 2.13936400  |
| C | -0.70381800 | 2.03273000  | 4.00384400  |
| H | 0.57301400  | 2.44441500  | 2.32672800  |
| C | -3.01539200 | 1.59669100  | 3.49535400  |
| H | -3.57090600 | 1.68199300  | 1.41889100  |
| C | -1.99372400 | 1.71756200  | 4.42948900  |
| H | 0.10400000  | 2.12709400  | 4.72815600  |
| H | -4.02464600 | 1.34084800  | 3.81515700  |
| H | -2.19773100 | 1.56270400  | 5.48777600  |
| C | -0.18514400 | 3.79086500  | -0.28893700 |
| C | 0.49631700  | 3.98009800  | -1.49616800 |
| C | -0.23678300 | 4.83649300  | 0.63447400  |
| C | 1.11152900  | 5.19323500  | -1.77711100 |
| H | 0.56805800  | 3.15070200  | -2.20402900 |
| C | 0.39534100  | 6.04626900  | 0.35939200  |
| H | -0.76451500 | 4.70671300  | 1.57930300  |
| C | 1.06687400  | 6.22725600  | -0.84513700 |
| H | 1.64096200  | 5.32697500  | -2.71913600 |

|   |            |             |             |
|---|------------|-------------|-------------|
| H | 0.35823200 | 6.85247000  | 1.09070600  |
| H | 1.56071500 | 7.17442400  | -1.05660800 |
| C | 3.24196900 | 0.96259900  | -0.81573800 |
| C | 2.15543800 | 0.21813100  | -1.03752700 |
| C | 1.78106800 | -1.06560200 | -1.42798100 |
| C | 4.53984300 | 0.37754000  | -1.28984600 |
| O | 4.62286000 | -0.24823100 | -2.33371100 |
| C | 5.77180000 | 0.56364000  | -0.45755600 |
| C | 5.73577700 | 0.63196800  | 0.93713900  |
| C | 7.00857400 | 0.56591300  | -1.10814900 |
| C | 6.91612200 | 0.71084300  | 1.66819800  |
| H | 4.77739200 | 0.59138100  | 1.45475300  |
| C | 8.18609200 | 0.66991500  | -0.38144500 |
| H | 7.01943300 | 0.47538000  | -2.19269100 |
| C | 8.14158300 | 0.74186700  | 1.00919100  |
| H | 6.87934000 | 0.74666000  | 2.75586200  |
| H | 9.14498200 | 0.68492400  | -0.89739600 |
| H | 9.06560800 | 0.81339000  | 1.58128700  |
| C | 3.23532700 | 2.33659000  | -0.20926200 |
| H | 3.66608900 | 3.08247200  | -0.89479000 |
| H | 2.20796600 | 2.64558500  | 0.01039100  |
| H | 3.81765400 | 2.39801500  | 0.71903600  |
| C | 2.12931500 | -2.29084000 | -0.68918000 |
| C | 1.99368400 | -3.53638400 | -1.31589600 |
| C | 2.63313500 | -2.26083000 | 0.61932100  |
| C | 2.36032800 | -4.70981800 | -0.66675900 |
| H | 1.61108000 | -3.57623400 | -2.33686000 |
| C | 2.99996800 | -3.43160700 | 1.26598800  |
| H | 2.72317800 | -1.30045200 | 1.12808200  |
| C | 2.86898800 | -4.66383000 | 0.62716700  |
| H | 2.25447800 | -5.66509600 | -1.17995200 |
| H | 3.38500200 | -3.38390500 | 2.28420900  |
| H | 3.16000800 | -5.58107800 | 1.13777400  |
| H | 1.56440700 | -1.21820300 | -2.49111700 |

**TS12**

|    |             |             |             |
|----|-------------|-------------|-------------|
| P  | 1.39142100  | -2.07367200 | -0.44781900 |
| Pd | -0.05670500 | -0.18444500 | -0.38861900 |
| P  | 1.23211700  | 1.69324600  | 0.37873900  |
| C  | 2.91994800  | 1.51007500  | 1.09095400  |
| C  | 3.98588000  | 1.23258600  | 0.22446600  |
| C  | 3.17034800  | 1.56255200  | 2.46391200  |
| C  | 5.27175700  | 1.05036800  | 0.71599000  |
| H  | 3.80877400  | 1.17010400  | -0.85082800 |

|   |             |             |             |
|---|-------------|-------------|-------------|
| C | 4.45687400  | 1.36053600  | 2.95733200  |
| H | 2.35445400  | 1.76788800  | 3.15702300  |
| C | 5.51254200  | 1.11718000  | 2.08648900  |
| H | 6.08938900  | 0.85038300  | 0.02434700  |
| H | 4.63251700  | 1.40160600  | 4.03171200  |
| H | 6.51983600  | 0.97055000  | 2.47430400  |
| C | 0.32242800  | 2.53591400  | 1.74316300  |
| C | 0.36211900  | 3.91198000  | 1.97915200  |
| C | -0.48465100 | 1.73332100  | 2.55690000  |
| C | -0.40015800 | 4.47461600  | 2.99927200  |
| H | 0.97832000  | 4.55448700  | 1.34998600  |
| C | -1.23742700 | 2.29236700  | 3.58407400  |
| H | -0.53530800 | 0.66077600  | 2.34970400  |
| C | -1.20175700 | 3.66772600  | 3.80182000  |
| H | -0.36863400 | 5.55057500  | 3.16671200  |
| H | -1.86337500 | 1.65532100  | 4.20786600  |
| H | -1.80052400 | 4.11099200  | 4.59620600  |
| C | 1.49695100  | 3.04231100  | -0.84580700 |
| C | 0.64031000  | 3.07430800  | -1.94915700 |
| C | 2.47921700  | 4.03276800  | -0.72435000 |
| C | 0.74653500  | 4.08120000  | -2.90356900 |
| H | -0.12212500 | 2.29900300  | -2.04847200 |
| C | 2.59180100  | 5.03440400  | -1.68264600 |
| H | 3.16526600  | 4.01539500  | 0.12343200  |
| C | 1.72424300  | 5.06141600  | -2.77239600 |
| H | 0.06200500  | 4.09389400  | -3.75097300 |
| H | 3.36078300  | 5.79877700  | -1.57775100 |
| H | 1.81648200  | 5.84653100  | -3.52174200 |
| C | 2.66192400  | -2.15436300 | -1.77686200 |
| C | 3.40505800  | -3.30257200 | -2.06929300 |
| C | 2.89346500  | -0.99305300 | -2.52060600 |
| C | 4.37343800  | -3.28144800 | -3.06693400 |
| H | 3.22136800  | -4.22312900 | -1.51378300 |
| C | 3.86564100  | -0.96898700 | -3.51635400 |
| H | 2.29118100  | -0.10434000 | -2.31310800 |
| C | 4.60880200  | -2.11320400 | -3.78806100 |
| H | 4.94589200  | -4.18187000 | -3.28576700 |
| H | 4.03580200  | -0.05650600 | -4.08606800 |
| H | 5.36702300  | -2.09895300 | -4.56972800 |
| C | 2.37845000  | -2.15194200 | 1.10075400  |
| C | 1.66447900  | -2.14516200 | 2.30714800  |
| C | 3.77296100  | -2.16088100 | 1.14605200  |
| C | 2.32885600  | -2.17770000 | 3.52584100  |
| H | 0.57270700  | -2.11736300 | 2.28214300  |

|   |             |             |             |
|---|-------------|-------------|-------------|
| C | 4.43895400  | -2.18229100 | 2.36988400  |
| H | 4.34948900  | -2.14010900 | 0.22117800  |
| C | 3.72173400  | -2.19798500 | 3.55959900  |
| H | 1.75846900  | -2.18311300 | 4.45385500  |
| H | 5.52819900  | -2.17826500 | 2.38846700  |
| H | 4.24540400  | -2.21684700 | 4.51450100  |
| C | 0.65680100  | -3.76392200 | -0.49722400 |
| C | -0.52580300 | -3.92061500 | -1.22615300 |
| C | 1.20525000  | -4.87647200 | 0.14982500  |
| C | -1.13368200 | -5.16685100 | -1.33313100 |
| H | -0.97731600 | -3.04094300 | -1.69022100 |
| C | 0.59196100  | -6.12174600 | 0.05072500  |
| H | 2.11373500  | -4.76582400 | 0.74363900  |
| C | -0.57416900 | -6.26997100 | -0.69473200 |
| H | -2.05438200 | -5.27429400 | -1.90486000 |
| H | 1.02683800  | -6.98069100 | 0.56038400  |
| H | -1.05301200 | -7.24534500 | -0.76949100 |
| C | -3.07412900 | -0.88971000 | 0.24353600  |
| C | -2.11573500 | -0.23823600 | -0.50656200 |
| C | -2.64914600 | 0.54497100  | -1.55481800 |
| C | -4.38466600 | -0.63246700 | -0.29639000 |
| O | -4.47843900 | 0.09771700  | -1.32971500 |
| C | -5.64778100 | -1.18737300 | 0.23360200  |
| C | -5.84935100 | -1.41978700 | 1.59836900  |
| C | -6.69770500 | -1.43274100 | -0.66003700 |
| C | -7.07111300 | -1.90023200 | 2.05521600  |
| H | -5.05716100 | -1.19647300 | 2.30991200  |
| C | -7.90872800 | -1.93204500 | -0.20429300 |
| H | -6.54126600 | -1.22261900 | -1.71586500 |
| C | -8.09851800 | -2.16677700 | 1.15585600  |
| H | -7.22146400 | -2.06521200 | 3.12080100  |
| H | -8.71290200 | -2.13058000 | -0.91080400 |
| H | -9.05158200 | -2.55109200 | 1.51605400  |
| C | -2.75899900 | -1.82933800 | 1.36676800  |
| H | -3.47819800 | -2.65511400 | 1.44352500  |
| H | -1.76597900 | -2.26538400 | 1.19223000  |
| H | -2.72507800 | -1.32923700 | 2.34824800  |
| C | -2.72650100 | 2.01421600  | -1.50808400 |
| C | -2.89902100 | 2.73199100  | -2.69409000 |
| C | -2.66065900 | 2.70697600  | -0.29305600 |
| C | -2.98944200 | 4.11937600  | -2.67389800 |
| H | -2.96156500 | 2.19071800  | -3.63899800 |
| C | -2.75173900 | 4.09076600  | -0.27394900 |
| H | -2.51009200 | 2.15523700  | 0.63554100  |

|   |             |            |             |
|---|-------------|------------|-------------|
| C | -2.91102700 | 4.80100000 | -1.46355800 |
| H | -3.11808700 | 4.66840300 | -3.60558600 |
| H | -2.68095200 | 4.61723300 | 0.67689900  |
| H | -2.97035200 | 5.88801300 | -1.44526600 |
| H | -2.57263000 | 0.12420000 | -2.56309400 |

**IM10**

|    |             |             |             |
|----|-------------|-------------|-------------|
| P  | -1.80073200 | 1.80449600  | -0.49471800 |
| Pd | 0.06629000  | 0.34125700  | -0.35381200 |
| P  | -0.87931900 | -1.67172400 | 0.55770300  |
| C  | -2.49170100 | -1.78471900 | 1.44648500  |
| C  | -3.68028300 | -1.81360700 | 0.70395700  |
| C  | -2.57659000 | -1.76081800 | 2.84042200  |
| C  | -4.91429000 | -1.86407700 | 1.34073400  |
| H  | -3.64026900 | -1.81004000 | -0.38688700 |
| C  | -3.81405300 | -1.79534500 | 3.47736400  |
| H  | -1.66694200 | -1.73384700 | 3.44006100  |
| C  | -4.98519300 | -1.85951000 | 2.73160300  |
| H  | -5.82597600 | -1.90196800 | 0.74543900  |
| H  | -3.85881200 | -1.78109100 | 4.56565500  |
| H  | -5.95241200 | -1.89832700 | 3.23111900  |
| C  | 0.30708400  | -2.30867200 | 1.81589500  |
| C  | 0.72262500  | -3.63849800 | 1.90057300  |
| C  | 0.87611400  | -1.36680800 | 2.68241300  |
| C  | 1.69478500  | -4.01639000 | 2.82506300  |
| H  | 0.30088400  | -4.38360300 | 1.22599800  |
| C  | 1.83067000  | -1.74691800 | 3.61785000  |
| H  | 0.57209800  | -0.31988400 | 2.59763700  |
| C  | 2.24987200  | -3.07444900 | 3.68415600  |
| H  | 2.01934000  | -5.05546000 | 2.87145400  |
| H  | 2.25966800  | -1.00400400 | 4.28955300  |
| H  | 3.01121700  | -3.37212300 | 4.40357400  |
| C  | -1.02911300 | -3.06566000 | -0.63339300 |
| C  | -0.35386900 | -2.95167100 | -1.85137800 |
| C  | -1.77026500 | -4.22632300 | -0.37617000 |
| C  | -0.42030200 | -3.97107000 | -2.79719100 |
| H  | 0.23937700  | -2.05496500 | -2.04665400 |
| C  | -1.83366200 | -5.24560100 | -1.31945200 |
| H  | -2.30551500 | -4.32850500 | 0.56864700  |
| C  | -1.16120400 | -5.11747700 | -2.53317200 |
| H  | 0.11742700  | -3.86581100 | -3.73872300 |
| H  | -2.41320400 | -6.14313000 | -1.10718500 |
| H  | -1.21842700 | -5.91449000 | -3.27342700 |
| C  | -3.08745100 | 1.45410900  | -1.76357700 |



|   |             |             |             |
|---|-------------|-------------|-------------|
| C | -4.06896900 | 2.37083300  | -2.15415500 |
| C | -3.06774500 | 0.19215800  | -2.36502500 |
| C | -5.01972300 | 2.02413500  | -3.10802300 |
| H | -4.08657100 | 3.36821800  | -1.71338400 |
| C | -4.02086700 | -0.15830900 | -3.31667200 |
| H | -2.28176300 | -0.51342500 | -2.08620000 |
| C | -4.99972100 | 0.75769200  | -3.68774700 |
| H | -5.77816200 | 2.74765500  | -3.40394400 |
| H | -3.98876500 | -1.14567300 | -3.77529100 |
| H | -5.74382200 | 0.48951800  | -4.43640800 |
| C | -2.73889500 | 1.86148600  | 1.08506300  |
| C | -2.00997600 | 2.16960100  | 2.24222500  |
| C | -4.09880300 | 1.57596400  | 1.20462900  |
| C | -2.63190000 | 2.21613200  | 3.48263100  |
| H | -0.94175100 | 2.38201500  | 2.16016500  |
| C | -4.71986800 | 1.61158200  | 2.45160500  |
| H | -4.68101600 | 1.31377800  | 0.32095000  |
| C | -3.99281200 | 1.93653100  | 3.58995100  |
| H | -2.05314200 | 2.46923300  | 4.37010900  |
| H | -5.78097700 | 1.37691700  | 2.52923500  |
| H | -4.48225100 | 1.96561600  | 4.56247400  |
| C | -1.45508000 | 3.59690100  | -0.76119200 |
| C | -0.32991700 | 3.93074500  | -1.51940100 |
| C | -2.25734900 | 4.62324900  | -0.25019900 |
| C | -0.02852100 | 5.26154300  | -1.78997200 |
| H | 0.31797100  | 3.12789400  | -1.87806300 |
| C | -1.95145400 | 5.95444800  | -0.51397700 |
| H | -3.12106400 | 4.37723600  | 0.36972500  |
| C | -0.84006100 | 6.27501400  | -1.28883900 |
| H | 0.85017800  | 5.50918900  | -2.38408900 |
| H | -2.58174400 | 6.74534300  | -0.10930100 |
| H | -0.60053200 | 7.31774400  | -1.49307900 |
| C | 2.96046300  | 1.23900600  | 0.31803600  |
| C | 2.06527900  | 0.58794300  | -0.57079100 |
| C | 2.94536100  | 0.06128600  | -1.65189300 |
| C | 4.25367400  | 1.12189000  | -0.17306600 |
| O | 4.32674300  | 0.46295000  | -1.32969600 |
| C | 5.52531600  | 1.62475200  | 0.33400400  |
| C | 5.71967700  | 1.89798700  | 1.69494100  |
| C | 6.59182800  | 1.82083200  | -0.55596500 |
| C | 6.94334000  | 2.37356400  | 2.14737700  |
| H | 4.91806800  | 1.70845600  | 2.40529200  |
| C | 7.80853700  | 2.30542600  | -0.10035600 |
| H | 6.44626600  | 1.59117200  | -1.60886200 |

|   |            |             |             |
|---|------------|-------------|-------------|
| C | 7.98797200 | 2.58560800  | 1.25229800  |
| H | 7.08449700 | 2.57363100  | 3.20813300  |
| H | 8.62423400 | 2.46215700  | -0.80406900 |
| H | 8.94477900 | 2.96214900  | 1.61037000  |
| C | 2.52703100 | 2.00171700  | 1.52756800  |
| H | 3.15017100 | 2.88639200  | 1.71473100  |
| H | 1.49262200 | 2.33773200  | 1.37208700  |
| H | 2.53621700 | 1.38657500  | 2.44106800  |
| C | 2.95639800 | -1.43000800 | -1.85014000 |
| C | 3.01222000 | -1.96085500 | -3.13673900 |
| C | 2.96711900 | -2.29439400 | -0.75208300 |
| C | 3.07669400 | -3.33804700 | -3.33251300 |
| H | 3.01117400 | -1.28630000 | -3.99379900 |
| C | 3.03115800 | -3.66811000 | -0.94673800 |
| H | 2.90938800 | -1.88548500 | 0.25838200  |
| C | 3.08549600 | -4.19325800 | -2.23642100 |
| H | 3.12159500 | -3.74162000 | -4.34340700 |
| H | 3.02755100 | -4.33206500 | -0.08302300 |
| H | 3.12973600 | -5.27125300 | -2.38484300 |
| H | 2.72168900 | 0.56220200  | -2.60669800 |

### TS13

|    |             |             |             |
|----|-------------|-------------|-------------|
| C  | -2.73721700 | 3.75462900  | 2.48219800  |
| C  | -2.34197500 | 4.02225400  | 1.16906600  |
| C  | -1.72444400 | 3.04791800  | 0.39068500  |
| C  | -1.48341400 | 1.76054100  | 0.88877300  |
| C  | -1.87472900 | 1.49684500  | 2.20461000  |
| C  | -2.49299700 | 2.47686200  | 2.98335500  |
| H  | -2.53003600 | 5.01160200  | 0.74582900  |
| H  | -1.45871400 | 3.28868400  | -0.64025700 |
| H  | -1.74961900 | 0.50065500  | 2.63558100  |
| H  | -2.80141100 | 2.23615700  | 4.00293400  |
| Pd | -0.67182600 | 0.40861300  | -0.38633100 |
| P  | -2.83136500 | -0.57662000 | -0.57660900 |
| C  | 1.83755200  | 2.30029900  | -0.80885100 |
| C  | 1.20776500  | 1.23954300  | -0.03802500 |
| C  | 2.25656900  | 0.76004300  | 0.78407700  |
| C  | 3.13340300  | 2.39814300  | -0.39091800 |
| O  | 3.40534200  | 1.46327400  | 0.57182700  |
| C  | -3.10282300 | -1.97615700 | -1.72957600 |
| C  | -4.25570900 | -2.76486300 | -1.62097000 |
| C  | -2.18708100 | -2.22335900 | -2.75477700 |
| C  | -4.49268400 | -3.78475800 | -2.53181000 |
| H  | -4.97370500 | -2.57561600 | -0.82183000 |

|   |             |             |             |
|---|-------------|-------------|-------------|
| C | -2.43240000 | -3.25118700 | -3.66485900 |
| H | -1.26983300 | -1.63281600 | -2.80622600 |
| C | -3.57955900 | -4.02729500 | -3.55743000 |
| H | -5.39101300 | -4.39394100 | -2.44351100 |
| H | -1.71283500 | -3.44537400 | -4.45862200 |
| H | -3.76505500 | -4.82877600 | -4.27133100 |
| C | -3.26452500 | -1.32476600 | 1.04179000  |
| C | -2.25326400 | -2.04086000 | 1.69249100  |
| C | -4.52116100 | -1.22757500 | 1.64122000  |
| C | -2.49600900 | -2.64721000 | 2.91937600  |
| H | -1.25809400 | -2.10151700 | 1.24391300  |
| C | -4.75835200 | -1.82387700 | 2.87711100  |
| H | -5.31838400 | -0.67234900 | 1.14720900  |
| C | -3.74829200 | -2.53253500 | 3.51800900  |
| H | -1.70126700 | -3.20745400 | 3.41047100  |
| H | -5.73985800 | -1.73203200 | 3.33992800  |
| H | -3.93564900 | -2.99709100 | 4.48491500  |
| C | -4.21270400 | 0.55725900  | -0.98658000 |
| C | -4.80656700 | 0.52317100  | -2.25272700 |
| C | -4.61692600 | 1.54274300  | -0.07624300 |
| C | -5.79065600 | 1.44511100  | -2.59563600 |
| H | -4.50024700 | -0.23044300 | -2.97749800 |
| C | -5.60524400 | 2.45692900  | -0.42099200 |
| H | -4.15665800 | 1.60313800  | 0.90933600  |
| C | -6.19548200 | 2.41113000  | -1.68061200 |
| H | -6.24449900 | 1.40282700  | -3.58456700 |
| H | -5.90535500 | 3.21483200  | 0.30192800  |
| H | -6.96774900 | 3.13003800  | -1.95009300 |
| C | 4.25751200  | 3.22513800  | -0.80628300 |
| C | 4.04045900  | 4.51490600  | -1.30622200 |
| C | 5.56905900  | 2.74339600  | -0.70776600 |
| C | 5.11202300  | 5.29903500  | -1.71329000 |
| H | 3.02865600  | 4.91485300  | -1.34564400 |
| C | 6.63575300  | 3.53243800  | -1.11453200 |
| H | 5.74031200  | 1.74172200  | -0.31766700 |
| C | 6.41145000  | 4.81003700  | -1.62174700 |
| H | 4.93131500  | 6.30214400  | -2.09541700 |
| H | 7.65088700  | 3.14654300  | -1.03820600 |
| H | 7.25094600  | 5.42614400  | -1.93903400 |
| C | 2.65823100  | -1.22786400 | -1.86422800 |
| C | 3.73487100  | -2.01513500 | -1.45310600 |
| C | 3.51127400  | -3.12956800 | -0.65556900 |
| C | 2.20704400  | -3.46371900 | -0.28492600 |
| C | 1.13869600  | -2.68457600 | -0.69206300 |

|   |             |             |             |
|---|-------------|-------------|-------------|
| C | 1.32278400  | -1.54013000 | -1.50819400 |
| H | 2.81922200  | -0.36600500 | -2.51546400 |
| H | 4.74906600  | -1.75998600 | -1.75680200 |
| H | 2.05634300  | -4.34717400 | 0.33464100  |
| H | 0.11724500  | -2.94845900 | -0.41105100 |
| O | 0.32622100  | -0.78365800 | -1.89952000 |
| O | 4.51989800  | -3.97804400 | -0.25979100 |
| B | 5.73001100  | -3.63844200 | 0.24545800  |
| O | 6.58386700  | -4.68545500 | 0.47322300  |
| H | 7.43955600  | -4.43977900 | 0.83532000  |
| O | 6.03998400  | -2.32262900 | 0.51545200  |
| H | 6.92073300  | -2.19388600 | 0.88043900  |
| C | 1.16886100  | 3.02181200  | -1.92583400 |
| H | 1.89037600  | 3.37387800  | -2.67394600 |
| H | 0.45916100  | 2.34400400  | -2.41847800 |
| H | 0.60087300  | 3.89432500  | -1.57146200 |
| C | -3.38697700 | 4.81280900  | 3.32479600  |
| H | -2.64971100 | 5.52480200  | 3.72343500  |
| H | -4.11537500 | 5.39938400  | 2.74852100  |
| H | -3.91208100 | 4.37578200  | 4.18369100  |
| C | 2.29839800  | -0.28068100 | 1.81659100  |
| C | 3.45805700  | -1.03966800 | 1.99025700  |
| C | 1.16188600  | -0.54827800 | 2.58130600  |
| C | 3.47314700  | -2.06524300 | 2.92581400  |
| H | 4.33188200  | -0.85705300 | 1.36770800  |
| C | 1.18625200  | -1.57445100 | 3.51737900  |
| H | 0.27496100  | 0.06740500  | 2.44467400  |
| C | 2.33940500  | -2.33632000 | 3.68781800  |
| H | 4.37397400  | -2.66428100 | 3.04851600  |
| H | 0.30351600  | -1.76804100 | 4.12553100  |
| H | 2.35580900  | -3.14317200 | 4.41900400  |
| H | 1.92867100  | 0.16622000  | -0.35060300 |

**3<sub>a</sub>**

|   |             |             |             |
|---|-------------|-------------|-------------|
| C | -4.36122300 | -2.06686500 | 0.17415100  |
| C | -3.91499700 | -1.12151700 | 1.10290400  |
| C | -2.62764000 | -0.60968000 | 1.04407500  |
| C | -1.73893900 | -1.01747800 | 0.04075800  |
| C | -2.18322700 | -1.96408700 | -0.88661300 |
| C | -3.47357200 | -2.47821600 | -0.81936700 |
| H | -4.59272900 | -0.78733300 | 1.89000500  |
| H | -2.29421300 | 0.12282400  | 1.77916300  |
| H | -1.50949600 | -2.28710800 | -1.68083300 |
| H | -3.80262800 | -3.20989400 | -1.55831300 |

|                       |             |             |             |
|-----------------------|-------------|-------------|-------------|
| C                     | 0.82689000  | -1.27718000 | -0.01634200 |
| C                     | -0.36959800 | -0.48543900 | -0.02552700 |
| C                     | 0.03221600  | 0.83015200  | -0.04429600 |
| C                     | 1.87277400  | -0.38907300 | -0.02366300 |
| O                     | 1.39021900  | 0.88555900  | -0.03407000 |
| C                     | -0.65547400 | 2.11074000  | -0.11605500 |
| C                     | -1.97688600 | 2.20457800  | -0.57582800 |
| C                     | 0.01309200  | 3.28713900  | 0.25067600  |
| C                     | -2.61247300 | 3.43635200  | -0.64519900 |
| H                     | -2.50192500 | 1.30508000  | -0.89204100 |
| C                     | -0.62653200 | 4.51676700  | 0.17363200  |
| H                     | 1.04249500  | 3.22528900  | 0.59806600  |
| C                     | -1.94345300 | 4.59817500  | -0.26942000 |
| H                     | -3.63793100 | 3.48978600  | -1.00752800 |
| H                     | -0.09099300 | 5.41937300  | 0.46426800  |
| H                     | -2.44377900 | 5.56334600  | -0.32810300 |
| C                     | 0.88226700  | -2.76406900 | 0.08111300  |
| H                     | 1.02375900  | -3.24552900 | -0.89833800 |
| H                     | 1.70464400  | -3.09472600 | 0.72856600  |
| H                     | -0.05395900 | -3.15667300 | 0.49661000  |
| C                     | 3.31762800  | -0.53033300 | 0.00482700  |
| C                     | 3.93777700  | -1.73327900 | -0.36267200 |
| C                     | 4.12684400  | 0.54740800  | 0.39431500  |
| C                     | 5.32026300  | -1.85876700 | -0.31859400 |
| H                     | 3.33388800  | -2.56893400 | -0.71039400 |
| C                     | 5.50760700  | 0.41815600  | 0.42938700  |
| H                     | 3.65628100  | 1.48817100  | 0.67283000  |
| C                     | 6.11246400  | -0.78640700 | 0.07916000  |
| H                     | 5.78256700  | -2.80060300 | -0.61036000 |
| H                     | 6.11818200  | 1.26620900  | 0.73588100  |
| H                     | 7.19598000  | -0.88630000 | 0.11027800  |
| C                     | -5.74795800 | -2.63035000 | 0.26304100  |
| H                     | -5.84445600 | -3.32632400 | 1.10839500  |
| H                     | -6.49597300 | -1.84076100 | 0.41388500  |
| H                     | -6.01856500 | -3.18073400 | -0.64625000 |
| <b>3<sub>a</sub>'</b> |             |             |             |
| C                     | 0.67936200  | 1.89205300  | -0.06197200 |
| C                     | -0.74225200 | 1.92088600  | -0.06980000 |
| C                     | -1.17943200 | 0.62614500  | -0.02465800 |
| C                     | 1.02626700  | 0.56198900  | -0.00889300 |
| O                     | -0.10487300 | -0.20325200 | 0.00864200  |
| C                     | 2.28816800  | -0.15480300 | 0.00282500  |
| C                     | 3.48981900  | 0.49348100  | 0.32382500  |

|   |             |             |             |
|---|-------------|-------------|-------------|
| C | 2.32866900  | -1.52364000 | -0.30283800 |
| C | 4.69143400  | -0.20262200 | 0.32245500  |
| H | 3.48212600  | 1.54513500  | 0.60184700  |
| C | 3.53153400  | -2.21457200 | -0.29687900 |
| H | 1.40257700  | -2.03791400 | -0.55071400 |
| C | 4.72061300  | -1.55836500 | 0.01131600  |
| H | 5.61258500  | 0.31908600  | 0.57783400  |
| H | 3.54148500  | -3.27608000 | -0.53974200 |
| H | 5.66357500  | -2.10225500 | 0.01336300  |
| C | 1.56721700  | 3.08831800  | -0.13497800 |
| H | 2.40128400  | 2.93663600  | -0.83277300 |
| H | 1.00228200  | 3.96372000  | -0.47744200 |
| H | 2.00110900  | 3.34706200  | 0.84181400  |
| C | -2.49754400 | 0.02240600  | 0.00491700  |
| C | -2.65762900 | -1.36490600 | 0.11218400  |
| C | -3.64104100 | 0.82974400  | -0.06597500 |
| C | -3.92807000 | -1.92425400 | 0.15082700  |
| H | -1.77526700 | -1.99885600 | 0.16849700  |
| C | -4.90727800 | 0.26597200  | -0.02649100 |
| H | -3.53188700 | 1.91030500  | -0.15341400 |
| C | -5.05803900 | -1.11468600 | 0.08339100  |
| H | -4.03606900 | -3.00443000 | 0.23655700  |
| H | -5.78466000 | 0.90852800  | -0.08053400 |
| H | -6.05227900 | -1.55668800 | 0.11642900  |
| H | -1.35865300 | 2.81289400  | -0.10640100 |

**1b**

|   |             |             |             |
|---|-------------|-------------|-------------|
| C | 2.23375900  | 0.52628000  | -0.27086700 |
| C | 2.49870100  | -0.68180400 | 0.16852700  |
| C | 2.77804300  | -1.86923900 | 0.62366700  |
| H | 2.77157100  | -2.74558700 | -0.02426300 |
| C | 0.91623600  | 1.21489700  | -0.20192200 |
| O | 0.89793700  | 2.43442400  | -0.19488800 |
| C | -0.34500000 | 0.42767800  | -0.11556100 |
| C | -0.47209000 | -0.87186000 | -0.61274400 |
| C | -1.45968900 | 1.05868700  | 0.44638200  |
| C | -1.69126600 | -1.53515500 | -0.53183900 |
| H | 0.37766600  | -1.35573500 | -1.08964100 |
| C | -2.67093000 | 0.38991700  | 0.54266100  |
| H | -1.34745900 | 2.07963500  | 0.80590400  |
| C | -2.78753800 | -0.90965400 | 0.05370400  |
| H | -1.78762000 | -2.54283100 | -0.93245800 |
| H | -3.53012600 | 0.88252300  | 0.99470300  |
| H | -3.73979300 | -1.43343400 | 0.12268900  |

|                      |             |             |             |
|----------------------|-------------|-------------|-------------|
| H                    | 3.02248600  | -2.03135600 | 1.67300000  |
| H                    | 3.04842600  | 1.17291600  | -0.60287500 |
| <b>C<sub>b</sub></b> |             |             |             |
| C                    | 3.71289700  | -2.19977100 | 2.95093700  |
| C                    | 2.80342800  | -1.30497200 | 3.51262100  |
| C                    | 1.86702700  | -0.63529100 | 2.72259500  |
| C                    | 1.81054200  | -0.85370900 | 1.34445600  |
| C                    | 2.72838700  | -1.74225200 | 0.77591900  |
| C                    | 3.66222300  | -2.40274000 | 1.56893400  |
| H                    | 2.82417000  | -1.12956000 | 4.59007200  |
| H                    | 1.15604600  | 0.04146200  | 3.20280000  |
| H                    | 2.70720700  | -1.94464700 | -0.29822400 |
| H                    | 4.36558700  | -3.09921200 | 1.10768800  |
| Pd                   | 0.43550600  | 0.13150300  | 0.23239100  |
| P                    | -0.68993400 | -1.84082800 | -0.37471400 |
| C                    | 2.87168900  | 1.30037200  | -1.27709600 |
| C                    | 2.07132900  | 1.60268900  | -0.28034800 |
| C                    | 1.36949900  | 2.15026600  | 0.72030500  |
| C                    | 3.91628100  | 2.22874500  | -1.80378700 |
| O                    | 4.18306300  | 2.19883600  | -2.99147600 |
| C                    | -2.43973400 | -1.58251600 | -0.80929900 |
| C                    | -2.93175500 | -1.70619100 | -2.10867000 |
| C                    | -3.30949000 | -1.22980400 | 0.22797900  |
| C                    | -4.28133400 | -1.48106800 | -2.36488400 |
| H                    | -2.26334500 | -1.97536400 | -2.92562300 |
| C                    | -4.65540900 | -1.00781100 | -0.03168100 |
| H                    | -2.92884300 | -1.11532900 | 1.24407400  |
| C                    | -5.14109200 | -1.12969200 | -1.33021700 |
| H                    | -4.65936100 | -1.57694200 | -3.38150600 |
| H                    | -5.32020300 | -0.70894000 | 0.77666300  |
| H                    | -6.19315300 | -0.93897000 | -1.53568900 |
| C                    | 0.18299400  | -2.23638500 | -1.92952100 |
| C                    | 0.26654200  | -1.22444500 | -2.89919400 |
| C                    | 0.85115300  | -3.44556000 | -2.13082600 |
| C                    | 0.99512000  | -1.44072100 | -4.06228000 |
| H                    | -0.23050800 | -0.26680000 | -2.71911200 |
| C                    | 1.58542700  | -3.64959700 | -3.29701700 |
| H                    | 0.80585300  | -4.22789500 | -1.37391200 |
| C                    | 1.65632700  | -2.65173400 | -4.26206600 |
| H                    | 1.05888500  | -0.65325300 | -4.81117200 |
| H                    | 2.10518100  | -4.59448600 | -3.44727100 |
| H                    | 2.23348100  | -2.81324400 | -5.17096500 |
| C                    | -0.74866800 | -3.39511800 | 0.58653800  |

|   |             |             |             |
|---|-------------|-------------|-------------|
| C | -1.48770100 | -4.47047400 | 0.07340000  |
| C | -0.11569800 | -3.52769300 | 1.82322200  |
| C | -1.57192000 | -5.66278700 | 0.77885800  |
| H | -2.00361700 | -4.36625800 | -0.88215900 |
| C | -0.20942800 | -4.72351400 | 2.53120800  |
| H | 0.44918700  | -2.69499900 | 2.23756300  |
| C | -0.93154100 | -5.79031900 | 2.01023900  |
| H | -2.14607300 | -6.49318000 | 0.37145600  |
| H | 0.28645100  | -4.81510500 | 3.49607800  |
| H | -1.00272800 | -6.72442900 | 2.56529700  |
| C | 4.60207800  | 3.16302000  | -0.87174200 |
| C | 4.75312500  | 2.89730000  | 0.49288500  |
| C | 5.16663800  | 4.32125000  | -1.41539400 |
| C | 5.44356000  | 3.79104700  | 1.30343700  |
| H | 4.36017500  | 1.97194200  | 0.91410800  |
| C | 5.83884900  | 5.22041800  | -0.60155200 |
| H | 5.05935700  | 4.49490100  | -2.48435200 |
| C | 5.97638300  | 4.95617100  | 0.75997700  |
| H | 5.57124500  | 3.57433700  | 2.36256800  |
| H | 6.26217300  | 6.12893900  | -1.02638800 |
| H | 6.51036700  | 5.65814800  | 1.39863000  |
| C | -2.30907600 | 1.79376800  | 0.79436500  |
| C | -3.54241800 | 2.25212000  | 1.24663200  |
| C | -4.54907400 | 2.54855800  | 0.33757700  |
| C | -4.31405500 | 2.38349400  | -1.02594100 |
| C | -3.08847000 | 1.92277300  | -1.47652200 |
| C | -2.04465600 | 1.60768900  | -0.58004900 |
| H | -1.52382800 | 1.54569400  | 1.51532900  |
| H | -3.72909500 | 2.37969200  | 2.31261700  |
| H | -5.11850500 | 2.60914400  | -1.72553300 |
| H | -2.90120200 | 1.78349800  | -2.54087000 |
| O | -0.89519700 | 1.16232700  | -1.04615100 |
| O | -5.80595900 | 2.93957900  | 0.74924300  |
| B | -6.05737700 | 4.07593800  | 1.44964000  |
| O | -7.37472600 | 4.28510200  | 1.77070400  |
| H | -7.53863800 | 5.09003700  | 2.26951800  |
| O | -5.02954300 | 4.91924100  | 1.78647900  |
| H | -5.30172300 | 5.71405800  | 2.25379500  |
| C | 4.72368300  | -2.92058000 | 3.79378000  |
| H | 5.75013800  | -2.62092200 | 3.53986300  |
| H | 4.57556700  | -2.71651600 | 4.86140000  |
| H | 4.66695400  | -4.00851800 | 3.65142200  |
| H | 1.70583700  | 2.04796000  | 1.75369500  |
| H | 0.55933800  | 2.84813600  | 0.50378300  |



|                        |             |             |             |
|------------------------|-------------|-------------|-------------|
| H                      | 2.72714500  | 0.38991200  | -1.86019500 |
| <b>TS6<sub>b</sub></b> |             |             |             |
| C                      | 0.01590700  | -4.94340300 | -1.77567100 |
| C                      | 0.07986900  | -3.73338900 | -2.47215500 |
| C                      | 0.00568100  | -2.51524500 | -1.80554500 |
| C                      | -0.13371300 | -2.46888400 | -0.41526500 |
| C                      | -0.23417300 | -3.67374500 | 0.27968200  |
| C                      | -0.15272700 | -4.89377000 | -0.39328400 |
| H                      | 0.21114100  | -3.74922800 | -3.55640700 |
| H                      | 0.09269500  | -1.58993800 | -2.38003600 |
| H                      | -0.35273600 | -3.67377700 | 1.36563100  |
| H                      | -0.21559200 | -5.82715000 | 0.17024900  |
| Pd                     | -0.13754000 | -0.69829500 | 0.55818800  |
| P                      | 2.22094300  | -0.48639200 | 0.22505200  |
| C                      | -3.32652700 | -0.91948200 | 0.07834900  |
| C                      | -2.17842400 | -0.93650300 | 0.77397900  |
| C                      | -2.18041900 | -1.05589700 | 2.14914000  |
| C                      | -4.47493100 | -1.02256700 | 0.98242500  |
| O                      | -4.26431300 | -1.09917600 | 2.20884400  |
| C                      | 2.68042300  | 1.10756700  | -0.52974100 |
| C                      | 3.83531800  | 1.79727700  | -0.15361900 |
| C                      | 1.83837800  | 1.65117800  | -1.50515000 |
| C                      | 4.13951800  | 3.01853900  | -0.74559500 |
| H                      | 4.49088500  | 1.38501600  | 0.61367700  |
| C                      | 2.14515900  | 2.87164100  | -2.09443800 |
| H                      | 0.92544600  | 1.12327200  | -1.78646900 |
| C                      | 3.29338300  | 3.55811400  | -1.70966200 |
| H                      | 5.03624300  | 3.55722700  | -0.44318100 |
| H                      | 1.46859500  | 3.30579600  | -2.82859800 |
| H                      | 3.51859100  | 4.52601400  | -2.15462800 |
| C                      | 3.13821800  | -0.52652900 | 1.80415500  |
| C                      | 2.55951400  | 0.12972200  | 2.89778400  |
| C                      | 4.40047700  | -1.11325800 | 1.93112300  |
| C                      | 3.24767200  | 0.19244600  | 4.10498900  |
| H                      | 1.57527500  | 0.59503200  | 2.77787600  |
| C                      | 5.07811200  | -1.04940200 | 3.14483400  |
| H                      | 4.85642500  | -1.61840500 | 1.07945900  |
| C                      | 4.50232300  | -0.39743200 | 4.23138700  |
| H                      | 2.79736500  | 0.70476400  | 4.95392000  |
| H                      | 6.06083100  | -1.50883400 | 3.24053900  |
| H                      | 5.03510500  | -0.34823800 | 5.18004100  |
| C                      | 3.00876500  | -1.75221400 | -0.82912700 |
| C                      | 3.49571300  | -1.44792800 | -2.10114300 |

|   |             |             |             |
|---|-------------|-------------|-------------|
| C | 2.99801100  | -3.08530000 | -0.40112600 |
| C | 3.95584500  | -2.46320000 | -2.93631400 |
| H | 3.50918000  | -0.41402100 | -2.44515100 |
| C | 3.45956600  | -4.09436600 | -1.23403100 |
| H | 2.60067500  | -3.33638200 | 0.58279800  |
| C | 3.93412000  | -3.78514000 | -2.50724500 |
| H | 4.33167200  | -2.21589000 | -3.92794200 |
| H | 3.43218000  | -5.12889500 | -0.89431500 |
| H | 4.28728200  | -4.57818200 | -3.16499200 |
| C | -5.86298800 | -1.03468300 | 0.48086100  |
| C | -6.15686300 | -1.09476900 | -0.88562600 |
| C | -6.91227200 | -0.98781300 | 1.40701200  |
| C | -7.47658500 | -1.10485200 | -1.31715600 |
| H | -5.35705600 | -1.14716600 | -1.62073700 |
| C | -8.22911400 | -0.99267600 | 0.97363600  |
| H | -6.66672800 | -0.94439400 | 2.46580000  |
| C | -8.51268500 | -1.05057600 | -0.38948700 |
| H | -7.69754600 | -1.15538700 | -2.38152800 |
| H | -9.03958100 | -0.95052300 | 1.69881000  |
| H | -9.54691100 | -1.05474600 | -0.72973100 |
| C | -1.05519300 | 2.50196400  | -0.06222500 |
| C | -1.01598500 | 3.69087300  | -0.78001500 |
| C | -0.10242300 | 4.68058400  | -0.43592700 |
| C | 0.75687600  | 4.48201900  | 0.64012800  |
| C | 0.71986300  | 3.29415500  | 1.35467800  |
| C | -0.17704600 | 2.25911000  | 1.01595000  |
| H | -1.76762900 | 1.71996100  | -0.33202000 |
| H | -1.69082800 | 3.85497300  | -1.62001100 |
| H | 1.47621300  | 5.26310700  | 0.88512900  |
| H | 1.41289600  | 3.12170500  | 2.17919300  |
| O | -0.17674100 | 1.12492600  | 1.69529700  |
| O | 0.03771300  | 5.82765700  | -1.19085000 |
| B | -0.94975200 | 6.74327100  | -1.37015700 |
| O | -0.62070100 | 7.81025700  | -2.16809000 |
| H | -1.32891000 | 8.44907700  | -2.28551700 |
| O | -2.17074800 | 6.56497400  | -0.77233000 |
| H | -2.80035200 | 7.27503800  | -0.92511500 |
| C | 0.15176700  | -6.24951700 | -2.50162500 |
| H | -0.56257100 | -6.33142600 | -3.33249400 |
| H | 1.15626900  | -6.36554200 | -2.93599700 |
| H | -0.01793600 | -7.10205500 | -1.83211800 |
| H | -2.00569800 | -0.16701400 | 2.75973400  |
| H | -2.04664900 | -2.02847900 | 2.62572000  |
| H | -3.40891900 | -0.82921300 | -0.99981700 |

**D<sub>b</sub>**

|    |             |             |             |
|----|-------------|-------------|-------------|
| C  | -3.22486600 | -3.85362200 | -1.50102000 |
| C  | -2.42748700 | -3.01783800 | -2.28422400 |
| C  | -1.70393900 | -1.97135800 | -1.71686500 |
| C  | -1.73463800 | -1.73370100 | -0.33945700 |
| C  | -2.57060600 | -2.54301300 | 0.43788600  |
| C  | -3.29936200 | -3.58514600 | -0.13349800 |
| H  | -2.36643800 | -3.19479200 | -3.36031200 |
| H  | -1.09270500 | -1.33972000 | -2.36530900 |
| H  | -2.64698600 | -2.37014900 | 1.51386800  |
| H  | -3.93232500 | -4.21234400 | 0.49904800  |
| Pd | -0.58366000 | -0.33098900 | 0.53707000  |
| P  | 1.39162300  | -1.68434200 | 0.25919100  |
| C  | -3.53494400 | 0.80167000  | 0.31581700  |
| C  | -2.18555100 | 0.89027100  | 0.61683800  |
| C  | -1.97476500 | 2.27515900  | 1.06840500  |
| C  | -4.12819700 | 2.04393400  | 0.56603000  |
| O  | -3.26833000 | 2.93775300  | 1.00844700  |
| C  | 2.51737000  | -0.84950100 | -0.91556200 |
| C  | 3.69334700  | -0.23255100 | -0.48484400 |
| C  | 2.11545300  | -0.69620300 | -2.24921700 |
| C  | 4.45939500  | 0.51576400  | -1.37394100 |
| H  | 3.99985900  | -0.30701100 | 0.55772500  |
| C  | 2.89416600  | 0.03265600  | -3.13936400 |
| H  | 1.18425600  | -1.15060600 | -2.59240400 |
| C  | 4.06664100  | 0.64348900  | -2.70110200 |
| H  | 5.36032200  | 1.01443200  | -1.02043300 |
| H  | 2.57647200  | 0.13591700  | -4.17595000 |
| H  | 4.66743800  | 1.23388800  | -3.39103300 |
| C  | 2.40945400  | -1.95393100 | 1.75509100  |
| C  | 2.28000100  | -1.07374700 | 2.83360400  |
| C  | 3.34682100  | -2.99145300 | 1.81096100  |
| C  | 3.08558200  | -1.23832500 | 3.95790800  |
| H  | 1.56501500  | -0.24937500 | 2.76653000  |
| C  | 4.14296400  | -3.15110400 | 2.93830800  |
| H  | 3.45137000  | -3.67696700 | 0.96938100  |
| C  | 4.01146500  | -2.27431400 | 4.01318000  |
| H  | 2.98651000  | -0.54822200 | 4.79470700  |
| H  | 4.86913300  | -3.96158900 | 2.97920900  |
| H  | 4.63702300  | -2.40032500 | 4.89585700  |
| C  | 1.15589400  | -3.38024200 | -0.39134400 |
| C  | 1.75747200  | -3.86351000 | -1.55381300 |
| C  | 0.28772400  | -4.21336100 | 0.32285400  |

|   |             |             |             |
|---|-------------|-------------|-------------|
| C | 1.47449900  | -5.14901400 | -2.00911900 |
| H | 2.44822500  | -3.23407400 | -2.11322100 |
| C | 0.01378400  | -5.49780500 | -0.12729100 |
| H | -0.18976400 | -3.84385900 | 1.23102000  |
| C | 0.59834800  | -5.96420100 | -1.30242000 |
| H | 1.94426700  | -5.51245200 | -2.92195300 |
| H | -0.67296300 | -6.13055400 | 0.43319300  |
| H | 0.37345000  | -6.96688700 | -1.66320000 |
| C | -5.50622800 | 2.46784300  | 0.40311100  |
| C | -6.46796500 | 1.56377200  | -0.06730000 |
| C | -5.88052900 | 3.78522300  | 0.70148100  |
| C | -7.78186800 | 1.97259100  | -0.23777000 |
| H | -6.18333300 | 0.53981400  | -0.30181200 |
| C | -7.19596400 | 4.18788100  | 0.52861400  |
| H | -5.12970700 | 4.48221900  | 1.06639100  |
| C | -8.14645100 | 3.28406500  | 0.05883000  |
| H | -8.52453100 | 1.26780000  | -0.60569000 |
| H | -7.48305400 | 5.21158800  | 0.76012000  |
| H | -9.17806100 | 3.60387100  | -0.07712800 |
| C | 1.26729300  | 2.32807700  | -0.33555800 |
| C | 2.20002500  | 3.16238600  | -0.94029200 |
| C | 3.26469700  | 3.66828300  | -0.20538500 |
| C | 3.39071400  | 3.33419500  | 1.14027900  |
| C | 2.46224600  | 2.50099300  | 1.74645500  |
| C | 1.37043200  | 1.96229200  | 1.02693800  |
| H | 0.46674100  | 1.88453000  | -0.93344100 |
| H | 2.11822500  | 3.40362200  | -1.99989300 |
| H | 4.23911700  | 3.72851400  | 1.69888700  |
| H | 2.55987600  | 2.23440100  | 2.79938200  |
| O | 0.50655200  | 1.17527500  | 1.63014600  |
| O | 4.26149600  | 4.41924400  | -0.79419000 |
| B | 4.05680200  | 5.60076900  | -1.42949300 |
| O | 5.17890500  | 6.17469300  | -1.97351600 |
| H | 5.02032700  | 7.01376900  | -2.41437500 |
| O | 2.79810300  | 6.14346300  | -1.49541900 |
| H | 2.75514200  | 6.99539600  | -1.93880000 |
| C | -3.94279400 | -5.02485700 | -2.10403800 |
| H | -3.30021800 | -5.91813600 | -2.12475000 |
| H | -4.84254100 | -5.28902400 | -1.53289300 |
| H | -4.24745600 | -4.82616900 | -3.14001200 |
| H | -1.27504700 | 2.84763800  | 0.44011900  |
| H | -1.59363400 | 2.32943100  | 2.09676000  |
| H | -4.04558400 | -0.08173000 | -0.05394600 |

**TS7<sub>b</sub>**

|    |             |             |             |
|----|-------------|-------------|-------------|
| C  | -2.76584500 | -4.22808500 | -1.41239000 |
| C  | -2.37946800 | -3.09309100 | -2.13594300 |
| C  | -1.90939300 | -1.95978700 | -1.48974900 |
| C  | -1.77032400 | -1.92886100 | -0.09279900 |
| C  | -2.20081900 | -3.04723400 | 0.62886900  |
| C  | -2.68426600 | -4.18008300 | -0.02112000 |
| H  | -2.44745400 | -3.10961200 | -3.22529100 |
| H  | -1.62229900 | -1.08511500 | -2.07810700 |
| H  | -2.12162800 | -3.05407800 | 1.71833200  |
| H  | -2.99549600 | -5.04910600 | 0.56154900  |
| Pd | -0.45633200 | -0.53865500 | 0.72585600  |
| P  | 1.74836700  | -1.39585900 | 0.17432900  |
| C  | -3.26076900 | 0.59134700  | 0.01542000  |
| C  | -2.38149200 | -0.13920900 | 0.83159500  |
| C  | -3.07601000 | -0.22453600 | 2.14099300  |
| C  | -4.40992900 | 0.86618500  | 0.73209000  |
| O  | -4.38503800 | 0.36423300  | 1.96698900  |
| C  | 2.51410400  | -0.26610000 | -1.04495300 |
| C  | 3.56838800  | 0.58481600  | -0.71183100 |
| C  | 1.92840500  | -0.16809900 | -2.31364700 |
| C  | 4.02909100  | 1.52253200  | -1.63230500 |
| H  | 4.01828600  | 0.53116300  | 0.27911200  |
| C  | 2.40443200  | 0.75324700  | -3.23700700 |
| H  | 1.09653600  | -0.82503300 | -2.57750200 |
| C  | 3.45339200  | 1.60473100  | -2.89476900 |
| H  | 4.83014100  | 2.20478500  | -1.35219100 |
| H  | 1.94916700  | 0.81615600  | -4.22471200 |
| H  | 3.81499900  | 2.34252100  | -3.60951800 |
| C  | 2.98429800  | -1.51750600 | 1.51895400  |
| C  | 2.77019000  | -0.76217700 | 2.67634800  |
| C  | 4.14180700  | -2.29369700 | 1.40006800  |
| C  | 3.71360000  | -0.78529700 | 3.70041400  |
| H  | 1.87198400  | -0.14125500 | 2.74554100  |
| C  | 5.07531800  | -2.31635900 | 2.42894300  |
| H  | 4.31339400  | -2.88468000 | 0.49980200  |
| C  | 4.86129000  | -1.56168700 | 3.58058400  |
| H  | 3.54676700  | -0.19025800 | 4.59748200  |
| H  | 5.97365100  | -2.92454300 | 2.33324900  |
| H  | 5.59488100  | -1.57994500 | 4.38555700  |
| C  | 1.83496900  | -3.03466300 | -0.64639400 |
| C  | 2.71961500  | -3.32970100 | -1.68862800 |
| C  | 0.97548800  | -4.03529600 | -0.18482900 |
| C  | 2.73762400  | -4.59926300 | -2.25803800 |

|   |             |             |             |
|---|-------------|-------------|-------------|
| H | 3.39340100  | -2.55808300 | -2.06202300 |
| C | 0.99063100  | -5.30281100 | -0.75619700 |
| H | 0.27005800  | -3.80896300 | 0.61477400  |
| C | 1.87141400  | -5.58599900 | -1.79546700 |
| H | 3.43029200  | -4.81700500 | -3.06975000 |
| H | 0.30281600  | -6.06598400 | -0.39293500 |
| H | 1.88271200  | -6.57645400 | -2.24833100 |
| C | -5.60113200 | 1.60259700  | 0.34860500  |
| C | -5.71941000 | 2.13867100  | -0.94063100 |
| C | -6.64305500 | 1.78470900  | 1.26754100  |
| C | -6.85757000 | 2.84230300  | -1.30175600 |
| H | -4.91613500 | 2.00457800  | -1.66274700 |
| C | -7.78011900 | 2.48946600  | 0.90045600  |
| H | -6.54538300 | 1.37037000  | 2.26814400  |
| C | -7.88967600 | 3.01961300  | -0.38227500 |
| H | -6.94208900 | 3.25723700  | -2.30413800 |
| H | -8.58410700 | 2.62934700  | 1.62036400  |
| H | -8.78134000 | 3.57534500  | -0.66707900 |
| C | 0.63770200  | 2.48369600  | -0.02910900 |
| C | 1.33764100  | 3.49905100  | -0.66347700 |
| C | 2.40529800  | 4.11665500  | -0.01936800 |
| C | 2.75422800  | 3.72055800  | 1.26662500  |
| C | 2.05701000  | 2.70042800  | 1.90033500  |
| C | 0.98443800  | 2.03557400  | 1.26499300  |
| H | -0.18335900 | 1.97744600  | -0.54458400 |
| H | 1.07247300  | 3.80818000  | -1.67407400 |
| H | 3.59539400  | 4.21212200  | 1.75487500  |
| H | 2.33369800  | 2.38293600  | 2.90620200  |
| O | 0.36267500  | 1.04968800  | 1.87872700  |
| O | 3.19729100  | 5.05222700  | -0.65547900 |
| B | 2.73642000  | 6.18460100  | -1.24235300 |
| O | 3.69521200  | 6.96951000  | -1.83518400 |
| H | 3.35266100  | 7.76856100  | -2.24474300 |
| O | 1.39701500  | 6.48559500  | -1.22240300 |
| H | 1.17393100  | 7.32981100  | -1.62461100 |
| C | -3.23314800 | -5.46201700 | -2.12285900 |
| H | -3.68660700 | -6.18066600 | -1.42935000 |
| H | -3.97339200 | -5.22947500 | -2.89997300 |
| H | -2.39533000 | -5.96984600 | -2.62281500 |
| H | -2.52885800 | 0.39737200  | 2.86760200  |
| H | -3.20412400 | -1.22921600 | 2.55537200  |
| H | -3.07092700 | 0.88663200  | -1.01096200 |

**E<sub>b</sub>**

|    |             |             |             |
|----|-------------|-------------|-------------|
| C  | -4.42813700 | 0.73649600  | 3.32144000  |
| C  | -4.75386500 | 0.02069900  | 2.17354600  |
| C  | -3.78184200 | -0.65014700 | 1.43943500  |
| C  | -2.44247700 | -0.63447600 | 1.84333900  |
| C  | -2.11063400 | 0.10045100  | 2.99460700  |
| C  | -3.08346100 | 0.76719300  | 3.71618100  |
| H  | -5.78310800 | 0.00712000  | 1.81255500  |
| H  | -4.08698700 | -1.16658900 | 0.52795900  |
| H  | -1.06896600 | 0.15923800  | 3.31287400  |
| H  | -2.80210500 | 1.33518200  | 4.60438700  |
| Pd | 0.05953000  | -0.02246300 | 0.16905400  |
| P  | 2.19444800  | 1.01142300  | -0.25198000 |
| C  | -0.10674400 | -1.71148900 | 1.50478900  |
| C  | -1.42035800 | -1.32241700 | 1.06345600  |
| C  | -1.77985200 | -2.29169500 | -0.02894200 |
| C  | 0.38649900  | -2.59680600 | 0.54061800  |
| O  | -0.54798800 | -2.97287700 | -0.34211100 |
| C  | 3.36047100  | 0.60421100  | 1.11049900  |
| C  | 4.66586400  | 0.15137000  | 0.90986000  |
| C  | 2.88642200  | 0.74619600  | 2.42106500  |
| C  | 5.48152700  | -0.15187500 | 1.99836500  |
| H  | 5.04969300  | 0.03080300  | -0.10374900 |
| C  | 3.69913500  | 0.44202200  | 3.50620300  |
| H  | 1.86385500  | 1.09722300  | 2.58133300  |
| C  | 5.00060200  | -0.01280000 | 3.29577800  |
| H  | 6.49902200  | -0.50214200 | 1.82806700  |
| H  | 3.31817500  | 0.55986500  | 4.51964900  |
| H  | 5.63775700  | -0.25469300 | 4.14502100  |
| C  | 3.10731100  | 0.44321700  | -1.73554500 |
| C  | 3.00467200  | -0.91178300 | -2.06781900 |
| C  | 3.92155200  | 1.27360900  | -2.50879000 |
| C  | 3.72068000  | -1.43443900 | -3.13723000 |
| H  | 2.35400400  | -1.55983000 | -1.47873200 |
| C  | 4.62584500  | 0.75211300  | -3.59074600 |
| H  | 4.00383300  | 2.33285900  | -2.26549000 |
| C  | 4.53191900  | -0.60076000 | -3.90281500 |
| H  | 3.63517600  | -2.49417900 | -3.37508700 |
| H  | 5.25287200  | 1.40789000  | -4.19305700 |
| H  | 5.08686700  | -1.00463300 | -4.74824600 |
| C  | 2.29576100  | 2.83621000  | -0.32730700 |
| C  | 3.43536900  | 3.54459600  | 0.07165300  |
| C  | 1.18914300  | 3.52633600  | -0.83355700 |
| C  | 3.47233700  | 4.92920800  | -0.04401700 |
| H  | 4.29717100  | 3.01038800  | 0.47432600  |

|                        |             |             |             |
|------------------------|-------------|-------------|-------------|
| C                      | 1.23635700  | 4.91324200  | -0.94857200 |
| H                      | 0.28860700  | 2.97125900  | -1.10682300 |
| C                      | 2.37245500  | 5.61353800  | -0.55672200 |
| H                      | 4.36075500  | 5.47660600  | 0.26800100  |
| H                      | 0.37233100  | 5.44859000  | -1.33894900 |
| H                      | 2.40175900  | 6.69880700  | -0.64447600 |
| C                      | 1.69285400  | -3.21851600 | 0.40771800  |
| C                      | 1.91490500  | -4.16167300 | -0.60557800 |
| C                      | 2.74972000  | -2.85482200 | 1.25342500  |
| C                      | 3.17469700  | -4.71973300 | -0.77318600 |
| H                      | 1.09247100  | -4.44157700 | -1.25961600 |
| C                      | 4.00435100  | -3.41895700 | 1.08076200  |
| H                      | 2.59709800  | -2.10429300 | 2.02928100  |
| C                      | 4.22232100  | -4.34838500 | 0.06533300  |
| H                      | 3.33960800  | -5.45069400 | -1.56294800 |
| H                      | 4.81999300  | -3.11819400 | 1.73584500  |
| H                      | 5.21086500  | -4.78326500 | -0.07175600 |
| C                      | -2.48759500 | 0.22615200  | -2.24974000 |
| C                      | -3.75169300 | -0.13184400 | -2.70576900 |
| C                      | -4.88367700 | 0.42173800  | -2.11842900 |
| C                      | -4.74881100 | 1.35324500  | -1.09278100 |
| C                      | -3.49117400 | 1.69799300  | -0.62448900 |
| C                      | -2.31621100 | 1.14627100  | -1.18614000 |
| H                      | -1.58928600 | -0.19074300 | -2.71026900 |
| H                      | -3.87647900 | -0.84261500 | -3.52225400 |
| H                      | -5.64670600 | 1.77879500  | -0.64318900 |
| H                      | -3.37560300 | 2.39378800  | 0.20714400  |
| O                      | -1.13215500 | 1.49522300  | -0.74444000 |
| O                      | -6.13268600 | 0.05757600  | -2.57915900 |
| B                      | -6.98675800 | -0.69150400 | -1.83709600 |
| O                      | -8.20472300 | -0.94711200 | -2.40957300 |
| H                      | -8.80080100 | -1.47371100 | -1.87041800 |
| O                      | -6.60126400 | -1.14914100 | -0.59586500 |
| H                      | -7.25733400 | -1.69913300 | -0.15748800 |
| C                      | -5.47206300 | 1.46188900  | 4.11580500  |
| H                      | -5.62422700 | 0.99970100  | 5.10186100  |
| H                      | -5.18704000 | 2.50730700  | 4.29646800  |
| H                      | -6.43947000 | 1.46395600  | 3.59905100  |
| H                      | -2.15107500 | -1.80736000 | -0.94607600 |
| H                      | -2.50657700 | -3.05786900 | 0.28723800  |
| H                      | 0.37798600  | -1.49001700 | 2.45121700  |
| <b>TS8<sub>b</sub></b> |             |             |             |
| C                      | -2.51540300 | 2.37941900  | 3.64042100  |



|    |             |             |             |
|----|-------------|-------------|-------------|
| C  | -1.61650400 | 1.40640100  | 4.06997100  |
| C  | -1.10457700 | 0.45676000  | 3.18410100  |
| C  | -1.46824500 | 0.47488600  | 1.83604000  |
| C  | -2.38408600 | 1.44536700  | 1.40398700  |
| C  | -2.89461200 | 2.37802700  | 2.29028600  |
| H  | -1.31145000 | 1.38550300  | 5.11713600  |
| H  | -0.39801000 | -0.28546000 | 3.55789500  |
| H  | -2.68336300 | 1.48157300  | 0.35383000  |
| H  | -3.59293500 | 3.13693900  | 1.93288700  |
| Pd | -0.13122700 | -0.45227200 | 0.53177100  |
| P  | 0.52665100  | 1.49232200  | -0.71613500 |
| C  | -3.10029200 | -1.49974500 | 0.54267900  |
| C  | -1.89027800 | -1.47008100 | 1.10909900  |
| C  | -0.82673300 | -2.26191000 | 1.48620500  |
| C  | -3.90811400 | -2.73365100 | 0.62548800  |
| O  | -3.57178200 | -3.68572600 | 1.31468700  |
| C  | 2.08458600  | 1.39398600  | -1.65702500 |
| C  | 2.13239300  | 1.32131000  | -3.04919400 |
| C  | 3.27489700  | 1.38756100  | -0.92242700 |
| C  | 3.36139100  | 1.24544500  | -3.69896300 |
| H  | 1.21130800  | 1.32478200  | -3.63089400 |
| C  | 4.49875500  | 1.31411800  | -1.57468600 |
| H  | 3.24351800  | 1.42929100  | 0.16729800  |
| C  | 4.54184700  | 1.24074900  | -2.96435500 |
| H  | 3.39329600  | 1.18814600  | -4.78583400 |
| H  | 5.41933000  | 1.29376100  | -0.99457300 |
| H  | 5.50127600  | 1.17176000  | -3.47444900 |
| C  | -0.82402200 | 1.48845500  | -1.95059800 |
| C  | -1.05968000 | 0.27998500  | -2.62593700 |
| C  | -1.70033700 | 2.56016800  | -2.13130000 |
| C  | -2.14583000 | 0.16533000  | -3.48404600 |
| H  | -0.38901200 | -0.56668900 | -2.45853700 |
| C  | -2.79565300 | 2.43234500  | -2.98308700 |
| H  | -1.53586900 | 3.49583500  | -1.59684500 |
| C  | -3.01837900 | 1.23890700  | -3.66056800 |
| H  | -2.31924100 | -0.77272700 | -4.00908600 |
| H  | -3.47693400 | 3.27138100  | -3.11537600 |
| H  | -3.87374100 | 1.14235400  | -4.32759800 |
| C  | 0.58518400  | 3.18101300  | -0.02220800 |
| C  | 0.89839200  | 4.27410300  | -0.84021200 |
| C  | 0.35374700  | 3.38693400  | 1.33839400  |
| C  | 0.94565500  | 5.55535700  | -0.30703000 |
| H  | 1.11189400  | 4.11360500  | -1.89828500 |
| C  | 0.40313000  | 4.67232300  | 1.87138900  |

|                      |             |             |             |
|----------------------|-------------|-------------|-------------|
| H                    | 0.13376400  | 2.53623000  | 1.98219200  |
| C                    | 0.69310600  | 5.75529200  | 1.04967900  |
| H                    | 1.18835800  | 6.40144700  | -0.94776100 |
| H                    | 0.21412000  | 4.82038800  | 2.93406400  |
| H                    | 0.73336200  | 6.76057100  | 1.46634300  |
| C                    | -5.17708100 | -2.78079000 | -0.16372000 |
| C                    | -5.46826400 | -1.89759200 | -1.20735900 |
| C                    | -6.09627300 | -3.78581800 | 0.15450800  |
| C                    | -6.66175700 | -2.01202900 | -1.91141500 |
| H                    | -4.75321300 | -1.12994600 | -1.49861300 |
| C                    | -7.29250600 | -3.89171000 | -0.53928300 |
| H                    | -5.84332300 | -4.47373300 | 0.95861900  |
| C                    | -7.57783700 | -3.00321200 | -1.57402700 |
| H                    | -6.87612500 | -1.32505900 | -2.72846500 |
| H                    | -8.00611100 | -4.67118900 | -0.27753300 |
| H                    | -8.51545700 | -3.08697000 | -2.12155200 |
| C                    | 2.88417500  | -1.49507500 | 0.80369200  |
| C                    | 4.23250100  | -1.69141600 | 1.08596500  |
| C                    | 5.09981500  | -2.09487200 | 0.07879900  |
| C                    | 4.61057700  | -2.28999100 | -1.21119500 |
| C                    | 3.26961700  | -2.08872900 | -1.49384100 |
| C                    | 2.36372800  | -1.67994200 | -0.49278700 |
| H                    | 2.19991900  | -1.17602300 | 1.59723500  |
| H                    | 4.61516700  | -1.53900400 | 2.09404400  |
| H                    | 5.30771400  | -2.59193400 | -1.99211200 |
| H                    | 2.88450700  | -2.22210300 | -2.50423600 |
| O                    | 1.09620900  | -1.48308500 | -0.80445400 |
| O                    | 6.45317400  | -2.24578800 | 0.29132700  |
| B                    | 7.00503600  | -3.03310900 | 1.25056100  |
| O                    | 8.37670700  | -3.04195900 | 1.27889200  |
| H                    | 8.75513800  | -3.58793900 | 1.97336500  |
| O                    | 6.20526200  | -3.74714600 | 2.10629300  |
| H                    | 6.68140800  | -4.31481600 | 2.71887100  |
| C                    | -3.07390100 | 3.40168900  | 4.58354700  |
| H                    | -2.61851700 | 3.32497400  | 5.57812700  |
| H                    | -2.90518300 | 4.42239200  | 4.21265100  |
| H                    | -4.15962900 | 3.28474300  | 4.70639000  |
| H                    | -0.45506800 | -2.28068000 | 2.51072400  |
| H                    | -0.53886800 | -3.09043300 | 0.83790000  |
| H                    | -3.50590300 | -0.61232300 | 0.06202900  |
| <b>G<sub>b</sub></b> |             |             |             |
| C                    | 2.45414100  | 0.19583900  | 4.80605800  |
| C                    | 1.36861700  | 0.91112800  | 4.29479700  |

|    |             |             |             |
|----|-------------|-------------|-------------|
| C  | 0.41024600  | 0.29552400  | 3.50260600  |
| C  | 0.51209300  | -1.06375700 | 3.18490200  |
| C  | 1.59405700  | -1.78318600 | 3.70133900  |
| C  | 2.54368200  | -1.16360200 | 4.50268500  |
| H  | 1.27679000  | 1.97390200  | 4.52121500  |
| H  | -0.41833900 | 0.88568600  | 3.10833400  |
| H  | 1.67660900  | -2.84922700 | 3.49149100  |
| H  | 3.37307000  | -1.74722200 | 4.90380600  |
| Pd | -0.80375400 | -0.83087900 | 0.37035200  |
| P  | -1.87872500 | 1.13983300  | -0.31760100 |
| C  | -0.04492800 | -2.68208400 | 1.35861800  |
| C  | -0.48963800 | -1.74669200 | 2.33239300  |
| C  | -1.81920900 | -1.26711700 | 2.22499400  |
| C  | -0.88696200 | -3.73411600 | 0.73753500  |
| O  | -2.01497800 | -4.00054200 | 1.13768000  |
| C  | -0.69800300 | 2.42995400  | -0.82188800 |
| C  | -0.92687900 | 3.25378600  | -1.92664000 |
| C  | 0.47697200  | 2.58122100  | -0.07816300 |
| C  | 0.01244100  | 4.21695600  | -2.28111400 |
| H  | -1.83457900 | 3.13549400  | -2.51800000 |
| C  | 1.41197800  | 3.54564200  | -0.43476200 |
| H  | 0.67042200  | 1.92332500  | 0.77032200  |
| C  | 1.18133400  | 4.35973900  | -1.53975000 |
| H  | -0.16694600 | 4.85177300  | -3.14728300 |
| H  | 2.33967100  | 3.63562600  | 0.12778400  |
| H  | 1.92481100  | 5.09939500  | -1.83193200 |
| C  | -2.95006100 | 0.88599100  | -1.77262200 |
| C  | -2.47330300 | 0.04179000  | -2.78344100 |
| C  | -4.17938300 | 1.53337800  | -1.92484800 |
| C  | -3.23126900 | -0.14888400 | -3.93336000 |
| H  | -1.50468900 | -0.44928500 | -2.65474400 |
| C  | -4.93189300 | 1.33203200  | -3.07761600 |
| H  | -4.55061200 | 2.19650200  | -1.14339400 |
| C  | -4.45958200 | 0.49027200  | -4.08001000 |
| H  | -2.86167600 | -0.80838200 | -4.71675500 |
| H  | -5.89126100 | 1.83432600  | -3.19184000 |
| H  | -5.05202200 | 0.33103500  | -4.97971700 |
| C  | -2.95521000 | 1.94527300  | 0.92162700  |
| C  | -2.73692800 | 3.25028400  | 1.36672400  |
| C  | -4.01837800 | 1.20776900  | 1.45831000  |
| C  | -3.57007800 | 3.80818800  | 2.33422400  |
| H  | -1.91563200 | 3.83530900  | 0.95400500  |
| C  | -4.85458100 | 1.77109900  | 2.41264800  |
| H  | -4.19384400 | 0.18650000  | 1.11457300  |

|   |             |             |             |
|---|-------------|-------------|-------------|
| C | -4.62805000 | 3.07356100  | 2.85573700  |
| H | -3.39084300 | 4.82627200  | 2.67612200  |
| H | -5.68282500 | 1.19169700  | 2.81686700  |
| H | -5.27960700 | 3.51299800  | 3.60912800  |
| C | -0.27868100 | -4.50159200 | -0.38558000 |
| C | 0.78045100  | -4.00672800 | -1.15378300 |
| C | -0.82411800 | -5.75418100 | -0.68673400 |
| C | 1.29021800  | -4.76606300 | -2.20147500 |
| H | 1.16670000  | -3.00373000 | -0.97721100 |
| C | -0.30217800 | -6.51496800 | -1.72178300 |
| H | -1.66161900 | -6.10873300 | -0.08872900 |
| C | 0.75850000  | -6.02115900 | -2.47997500 |
| H | 2.10273900  | -4.36867300 | -2.80708900 |
| H | -0.72313100 | -7.49454300 | -1.94336900 |
| H | 1.16614000  | -6.61571600 | -3.29658200 |
| C | 2.32785200  | -0.12627800 | -0.42780000 |
| C | 3.50863900  | 0.60064500  | -0.52084900 |
| C | 3.79722500  | 1.31567400  | -1.67759800 |
| C | 2.89817000  | 1.29804200  | -2.74082600 |
| C | 1.71780700  | 0.57814000  | -2.64615800 |
| C | 1.39479300  | -0.15502200 | -1.48552400 |
| H | 2.09201300  | -0.66179600 | 0.49532900  |
| H | 4.21072700  | 0.62179800  | 0.31207300  |
| H | 3.13132200  | 1.88087700  | -3.63130200 |
| H | 0.99690200  | 0.58125400  | -3.46408700 |
| O | 0.26235100  | -0.83893100 | -1.43772300 |
| O | 4.91345700  | 2.11707000  | -1.77411300 |
| B | 6.19024500  | 1.66698700  | -1.65089300 |
| O | 7.16130000  | 2.62848900  | -1.76709400 |
| H | 8.05889200  | 2.29770000  | -1.67436100 |
| O | 6.43100600  | 0.33599200  | -1.42799900 |
| H | 7.36118000  | 0.09578000  | -1.39228900 |
| C | 3.50275600  | 0.86906000  | 5.63885700  |
| H | 3.13395100  | 1.80753000  | 6.07033200  |
| H | 3.83821700  | 0.22609300  | 6.46259400  |
| H | 4.39143800  | 1.11305400  | 5.03954100  |
| H | -2.14298100 | -0.45135700 | 2.87147800  |
| H | -2.59237600 | -1.95285100 | 1.88242300  |
| H | 1.03267200  | -2.81434200 | 1.25704400  |

**TS9<sub>b</sub>**

|   |             |            |             |
|---|-------------|------------|-------------|
| C | -4.25296600 | 3.75552400 | -2.37203700 |
| C | -4.68698200 | 2.53551500 | -1.85134600 |
| C | -3.88144300 | 1.78125800 | -1.01034100 |

|    |             |             |             |
|----|-------------|-------------|-------------|
| C  | -2.60352900 | 2.22711900  | -0.64001900 |
| C  | -2.16742700 | 3.44875800  | -1.16960600 |
| C  | -2.97512200 | 4.19239700  | -2.01743400 |
| H  | -5.67421300 | 2.15993400  | -2.12485100 |
| H  | -4.24052900 | 0.81509500  | -0.65414200 |
| H  | -1.18118200 | 3.83376100  | -0.91242700 |
| H  | -2.60677500 | 5.14004700  | -2.41341800 |
| Pd | -0.09445700 | 0.12862300  | -0.58421800 |
| P  | 2.13736200  | -0.52615800 | -0.77212000 |
| C  | -0.41790300 | 1.79352700  | 0.68064500  |
| C  | -1.75275300 | 1.41128600  | 0.24356100  |
| C  | -2.32947400 | 0.44600600  | 1.11442900  |
| C  | -0.26997200 | 1.53316000  | 2.10122900  |
| O  | -1.22742700 | 1.00641900  | 2.72025000  |
| C  | 3.31867600  | 0.86231400  | -0.56479000 |
| C  | 4.51683500  | 0.76421700  | 0.14658600  |
| C  | 2.99902700  | 2.06861600  | -1.19755700 |
| C  | 5.38130400  | 1.85338000  | 0.21991400  |
| H  | 4.77573700  | -0.16851700 | 0.64842000  |
| C  | 3.86188100  | 3.15614600  | -1.12357900 |
| H  | 2.05816000  | 2.14776700  | -1.74681400 |
| C  | 5.05546500  | 3.04967100  | -0.41211500 |
| H  | 6.31432000  | 1.76578500  | 0.77502000  |
| H  | 3.60477900  | 4.08854300  | -1.62383000 |
| H  | 5.73327300  | 3.90003400  | -0.35453400 |
| C  | 2.57929600  | -1.71023600 | 0.55050400  |
| C  | 2.50195700  | -1.27847900 | 1.88021800  |
| C  | 2.89138100  | -3.04499400 | 0.28474400  |
| C  | 2.74607600  | -2.15992700 | 2.92378700  |
| H  | 2.25688300  | -0.23868100 | 2.09742700  |
| C  | 3.12275100  | -3.93063000 | 1.33491100  |
| H  | 2.94864700  | -3.39640900 | -0.74527900 |
| C  | 3.05288200  | -3.49185900 | 2.65241400  |
| H  | 2.68870700  | -1.80407100 | 3.95182400  |
| H  | 3.36055300  | -4.97075300 | 1.11770000  |
| H  | 3.23473500  | -4.18855900 | 3.46914000  |
| C  | 2.73048600  | -1.33846800 | -2.30074700 |
| C  | 4.08360700  | -1.31611500 | -2.65904700 |
| C  | 1.81587000  | -2.05766400 | -3.07744600 |
| C  | 4.51864200  | -2.00645700 | -3.78317200 |
| H  | 4.80108700  | -0.75640300 | -2.05894400 |
| C  | 2.26341000  | -2.74975200 | -4.20053700 |
| H  | 0.76041100  | -2.06326900 | -2.79326700 |
| C  | 3.60786100  | -2.72529900 | -4.55443200 |

|                         |             |             |             |
|-------------------------|-------------|-------------|-------------|
| H                       | 5.57199400  | -1.98395700 | -4.05870500 |
| H                       | 1.55003300  | -3.30842300 | -4.80425100 |
| H                       | 3.95004900  | -3.26637900 | -5.43566200 |
| C                       | 0.97315700  | 1.82833900  | 2.84221600  |
| C                       | 1.09653700  | 1.34657900  | 4.15146300  |
| C                       | 2.04020900  | 2.52500200  | 2.26410700  |
| C                       | 2.27413200  | 1.53769200  | 4.85975900  |
| H                       | 0.25772800  | 0.80785800  | 4.58676100  |
| C                       | 3.21467800  | 2.72245000  | 2.97931200  |
| H                       | 1.96981100  | 2.89994200  | 1.24447000  |
| C                       | 3.33643200  | 2.22255900  | 4.27265500  |
| H                       | 2.36726600  | 1.15053300  | 5.87303400  |
| H                       | 4.03955600  | 3.25958600  | 2.51467900  |
| H                       | 4.26210600  | 2.36973600  | 4.82680500  |
| C                       | -1.70439900 | -2.71550300 | -0.06679600 |
| C                       | -2.78022400 | -3.13139800 | 0.71002100  |
| C                       | -4.07339500 | -2.75836500 | 0.36089300  |
| C                       | -4.29448300 | -2.02376300 | -0.80341000 |
| C                       | -3.22371700 | -1.60321000 | -1.57576100 |
| C                       | -1.89133000 | -1.89547000 | -1.20447900 |
| H                       | -0.68137600 | -2.97881400 | 0.21048600  |
| H                       | -2.63043600 | -3.73621100 | 1.60366500  |
| H                       | -5.31852700 | -1.77100000 | -1.08175200 |
| H                       | -3.37907800 | -0.99585100 | -2.46730100 |
| O                       | -0.87824700 | -1.39053000 | -1.87883000 |
| O                       | -5.12938800 | -3.15337000 | 1.15390700  |
| B                       | -5.87083800 | -2.26480400 | 1.86445200  |
| O                       | -6.91411700 | -2.79555600 | 2.57424000  |
| H                       | -7.42638700 | -2.15789100 | 3.07863300  |
| O                       | -5.54739000 | -0.92557700 | 1.84253300  |
| H                       | -6.11787600 | -0.37390100 | 2.38607500  |
| C                       | -5.13407700 | 4.57610400  | -3.26538400 |
| H                       | -5.80376400 | 5.22615700  | -2.68348700 |
| H                       | -4.54545200 | 5.22641100  | -3.92466700 |
| H                       | -5.77026300 | 3.94321500  | -3.89724000 |
| H                       | -1.85300700 | -0.50761200 | 1.33605000  |
| H                       | -3.40915000 | 0.43600800  | 1.29811400  |
| H                       | 0.08337000  | 2.66476500  | 0.25906500  |
| <b>TS10<sub>b</sub></b> |             |             |             |
| C                       | 3.49841700  | -3.64245600 | 1.16770300  |
| C                       | 2.82908700  | -3.68472000 | -0.05862200 |
| C                       | 1.47438500  | -3.41988000 | -0.14719100 |
| C                       | 0.73305800  | -3.09992600 | 0.99755600  |

|    |             |             |             |
|----|-------------|-------------|-------------|
| C  | 1.39019500  | -3.09774600 | 2.23345100  |
| C  | 2.75085000  | -3.36446200 | 2.31222700  |
| H  | 3.39628500  | -3.89231100 | -0.96643400 |
| H  | 0.99748900  | -3.39460800 | -1.12460900 |
| H  | 0.84111500  | -2.86153300 | 3.14576600  |
| H  | 3.24807300  | -3.34054900 | 3.28262200  |
| Pd | -0.53838300 | -0.47463100 | 0.76112500  |
| P  | -0.94436400 | 1.77544500  | 0.37033200  |
| C  | -1.55225300 | -2.89713800 | -0.25078000 |
| C  | -0.67287700 | -2.70084100 | 0.87398500  |
| C  | -1.55575900 | -2.30934000 | 1.93279200  |
| C  | -2.83083800 | -2.71055500 | 0.17704200  |
| O  | -2.85321700 | -2.45537200 | 1.52333700  |
| C  | -2.24688000 | 1.72059200  | -0.91441500 |
| C  | -3.46978200 | 2.37922700  | -0.77770100 |
| C  | -2.00923100 | 0.91565000  | -2.03926400 |
| C  | -4.45492200 | 2.22911900  | -1.75121200 |
| H  | -3.66195700 | 3.00514100  | 0.09382400  |
| C  | -2.99433600 | 0.78306600  | -3.00977500 |
| H  | -1.04991400 | 0.39525600  | -2.12558200 |
| C  | -4.22001600 | 1.43050400  | -2.86413100 |
| H  | -5.41104000 | 2.73714600  | -1.63425000 |
| H  | -2.80944700 | 0.15573400  | -3.88114500 |
| H  | -4.99475300 | 1.30622100  | -3.61958400 |
| C  | -1.63231900 | 2.87299000  | 1.66123900  |
| C  | -2.35849400 | 2.31511700  | 2.71502800  |
| C  | -1.50696700 | 4.26317800  | 1.57590100  |
| C  | -2.95910100 | 3.13202100  | 3.66664500  |
| H  | -2.44763900 | 1.22952800  | 2.78208100  |
| C  | -2.10113000 | 5.07896900  | 2.53268200  |
| H  | -0.94332800 | 4.70624000  | 0.75459400  |
| C  | -2.82815500 | 4.51483800  | 3.57730200  |
| H  | -3.52333100 | 2.68726700  | 4.48474400  |
| H  | -1.99601700 | 6.16032300  | 2.46135300  |
| H  | -3.29097300 | 5.15571500  | 4.32611600  |
| C  | 0.42492600  | 2.72773300  | -0.35639300 |
| C  | 0.29361500  | 3.45695300  | -1.54037700 |
| C  | 1.65670200  | 2.69978500  | 0.30478100  |
| C  | 1.38507400  | 4.15270200  | -2.05204300 |
| H  | -0.66108100 | 3.47553200  | -2.06645900 |
| C  | 2.74465700  | 3.39407400  | -0.20987600 |
| H  | 1.76967300  | 2.10695600  | 1.21266100  |
| C  | 2.60863200  | 4.11904500  | -1.38977300 |
| H  | 1.28009900  | 4.71554200  | -2.97835400 |

|                      |             |             |             |
|----------------------|-------------|-------------|-------------|
| H                    | 3.70934900  | 3.33612900  | 0.29155900  |
| H                    | 3.46620500  | 4.64710600  | -1.80354800 |
| C                    | -4.10396300 | -2.70400300 | -0.51817200 |
| C                    | -5.31115600 | -2.64441100 | 0.18825800  |
| C                    | -4.13573900 | -2.75720700 | -1.91773200 |
| C                    | -6.52072000 | -2.64326900 | -0.49411000 |
| H                    | -5.29202300 | -2.59997400 | 1.27487200  |
| C                    | -5.34631800 | -2.75586800 | -2.59350900 |
| H                    | -3.20157300 | -2.77919300 | -2.47792100 |
| C                    | -6.54418900 | -2.70047500 | -1.88427700 |
| H                    | -7.45333900 | -2.59799700 | 0.06584300  |
| H                    | -5.35612700 | -2.79324900 | -3.68149100 |
| H                    | -7.49430000 | -2.69817200 | -2.41569400 |
| C                    | 2.71842500  | -0.31350200 | 0.12934400  |
| C                    | 4.06831000  | 0.01556600  | 0.12211900  |
| C                    | 4.66287900  | 0.48427900  | -1.04409700 |
| C                    | 3.89333300  | 0.62731700  | -2.19542300 |
| C                    | 2.54583400  | 0.29867600  | -2.18648500 |
| C                    | 1.91013700  | -0.18327600 | -1.02136300 |
| H                    | 2.26029900  | -0.68922200 | 1.04745800  |
| H                    | 4.66670800  | -0.09522400 | 1.02657700  |
| H                    | 4.36907200  | 1.01638000  | -3.09545300 |
| H                    | 1.93653800  | 0.42754600  | -3.08163200 |
| O                    | 0.63099900  | -0.49494700 | -1.04782600 |
| O                    | 5.98111300  | 0.89383300  | -1.08775600 |
| B                    | 7.04902000  | 0.17178300  | -0.67337900 |
| O                    | 8.26474600  | 0.79448100  | -0.80812100 |
| H                    | 9.01593100  | 0.27644800  | -0.50677200 |
| O                    | 6.88931700  | -1.09486700 | -0.15850200 |
| H                    | 7.71513500  | -1.53072800 | 0.07237200  |
| C                    | 4.98209600  | -3.83678700 | 1.22566800  |
| H                    | 5.33951500  | -3.92225300 | 2.25948200  |
| H                    | 5.29292900  | -4.74034300 | 0.68348400  |
| H                    | 5.49651100  | -2.98364300 | 0.75678400  |
| H                    | -1.47294200 | -0.70193000 | 2.07517400  |
| H                    | -1.40919700 | -2.47924000 | 2.99598900  |
| H                    | -1.24242300 | -3.11583600 | -1.26530600 |
| <b>3<sub>b</sub></b> |             |             |             |
| C                    | -4.87435700 | -0.38965900 | -0.03936400 |
| C                    | -3.94048100 | -1.37398600 | 0.29269400  |
| C                    | -2.58192600 | -1.09451800 | 0.32322500  |
| C                    | -2.10451100 | 0.18406200  | 0.01414200  |
| C                    | -3.03813400 | 1.16680900  | -0.33141500 |



|   |             |             |             |
|---|-------------|-------------|-------------|
| C | -4.39662200 | 0.88413000  | -0.35189800 |
| H | -4.28930500 | -2.37855100 | 0.53672100  |
| H | -1.87624900 | -1.87546700 | 0.60609100  |
| H | -2.68971800 | 2.16093700  | -0.61177400 |
| H | -5.10544400 | 1.66559700  | -0.62858800 |
| C | 0.42144600  | -0.43066900 | -0.05981600 |
| C | -0.67342300 | 0.48506100  | 0.05457600  |
| C | -0.09306700 | 1.71027400  | 0.21997800  |
| C | 1.57055900  | 0.30027600  | 0.03587300  |
| O | 1.25556700  | 1.61456300  | 0.21054200  |
| C | 2.98194300  | -0.03875800 | -0.01246600 |
| C | 3.96080600  | 0.95721500  | 0.08681000  |
| C | 3.38660300  | -1.37223700 | -0.15503500 |
| C | 5.30833400  | 0.62469800  | 0.04647400  |
| H | 3.65313000  | 1.99476100  | 0.19726000  |
| C | 4.73430900  | -1.69894700 | -0.19566400 |
| H | 2.63536400  | -2.15771700 | -0.23283600 |
| C | 5.70233200  | -0.70252400 | -0.09424000 |
| H | 6.05806400  | 1.41025900  | 0.12738900  |
| H | 5.03207000  | -2.74043700 | -0.30617800 |
| H | 6.75932700  | -0.96104000 | -0.12459000 |
| C | -6.34246200 | -0.69488600 | -0.04633600 |
| H | -6.91130600 | 0.07648000  | -0.57973200 |
| H | -6.55149600 | -1.66010800 | -0.52608300 |
| H | -6.74650000 | -0.75180000 | 0.97453500  |
| H | -0.49313900 | 2.70260200  | 0.38354400  |
| H | 0.35257800  | -1.50007000 | -0.22532300 |
